# Supplementary material for: A novel synthetic-genetic-array–based yeast one-hybrid system for high discovery rate and short processing time
Source: PubMed Central journal article supplement — Genome Res. 2019 Aug;29(8):1343–51. doi: 10.1101/gr.245951.118 (PMC6673709; doi:10.1101/gr.245951.118), 2019-08
Supplement: supp_gr.245951.118_Supplemental_Material_figure_table_and_Information.pdf [file supp_gr.245951.118_Supplemental_Material_figure_table_and_Information.pdf]

## Supplementary Information

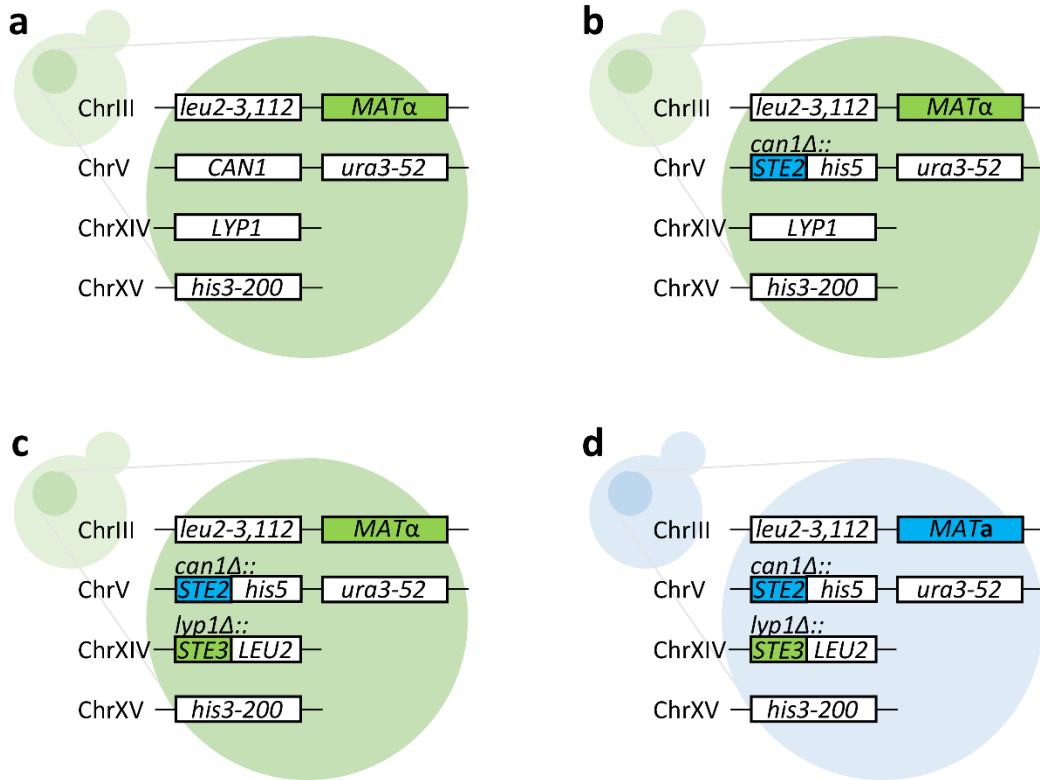

## Supplementary Figure 1

### Construction of the Y1HGold-MM strain

See Online Methods for details. (a-c) Magic marker *MM $\alpha$*  is a *his5* gene from *S. pombe* under the control of the *STE2* promoter (blue) and is expressed specifically in *MAT $\alpha$*  cells. It was chromosomally (Chr) integrated into the commercial Y1HGold strain (light green stands for *MAT $\alpha$* ) (a) at the *CAN1* locus (b). Magic marker *MM $\alpha$*  is a *LEU2* gene placed under the control of the *STE3* promoter (green) and is expressed specifically in *MAT $\alpha$*  cells. It was chromosomally (Chr) integrated into (b) strain at the *LYP1* locus (c). The (c) strain's mating type was switched into *MATa* by replacing the *MAT $\alpha$*  locus with the *MATa* cassette, resulting in Y1HGold-MM strain (d) (light blue stands for *MATa*).

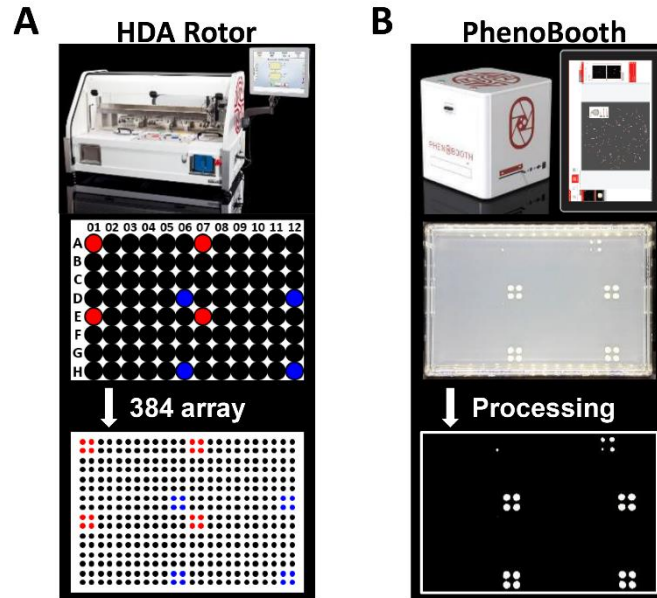

## Supplementary Figure 2

Diagram of the high-throughput Y1H screening procedure.

(A) The HDA rotor (Singer) was used to transfer cells by pinning. (B) PhenoBooth Colony Counter (Singer) was used to capture the images of the grown colonies on AbA-2 plates and for data processing.

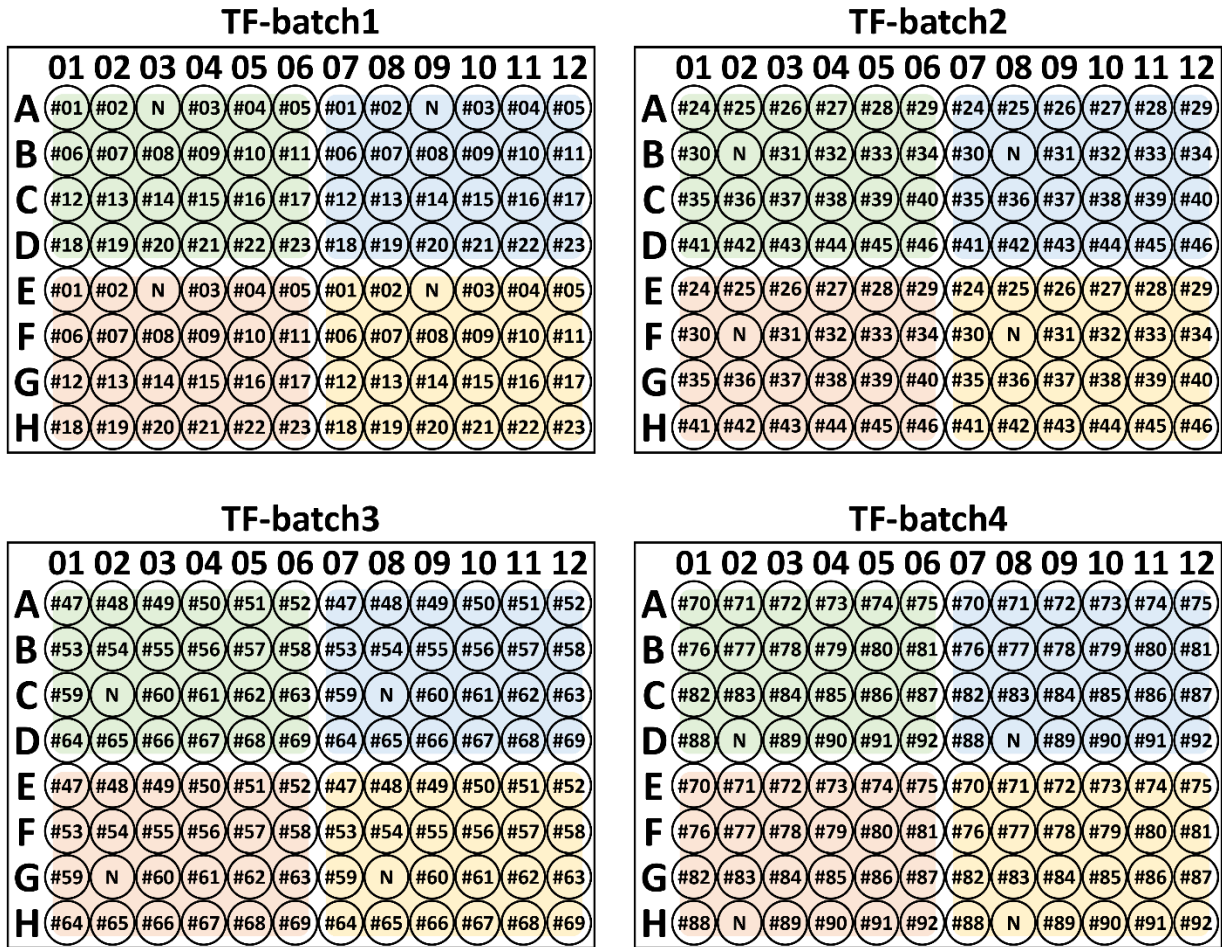

**Supplementary Figure 3**

Experimental arrangement of 4 batches of TFs

TF-batch1 (TF#01 to TF#23), TF-batch1 (TF#24 to TF#46), TF-batch1 (TF#47 to TF#69), TF-batch1 (TF#70 to TF#92). N (negative control) was arranged randomly in each of the batches.

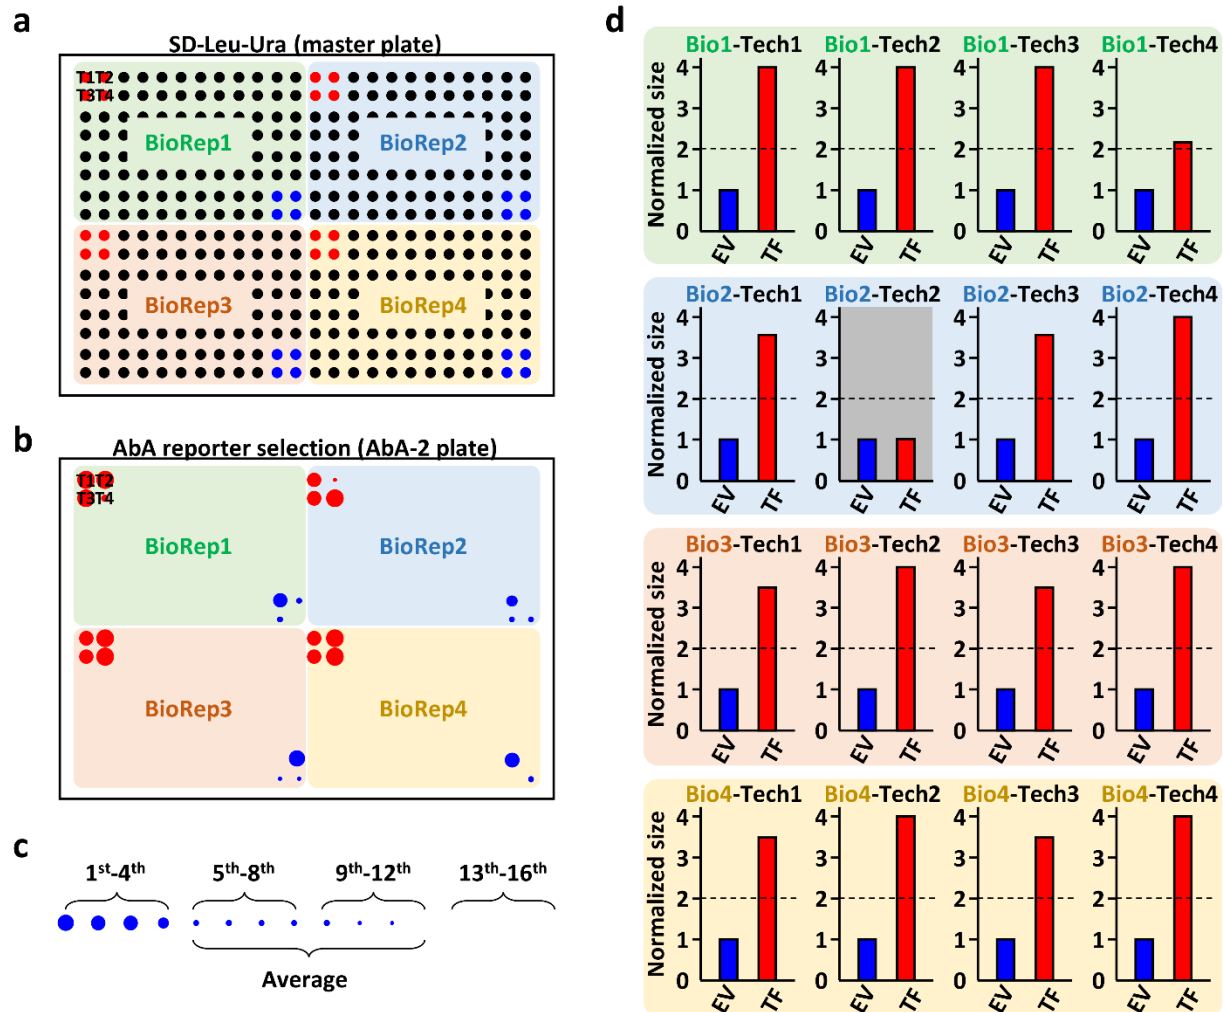

## Supplementary Figure 4

Diagram of data processing and scoring

See Online Methods for details. **(a)** A representative master plate. **(b)** An example of the AbA-2 plate illustrating the negative controls (blue colonies) and a hypothetical TF-DNA interacting events (red colonies). **(c)** The colony-size values of the negative controls were first ranked. Values from the 5<sup>th</sup> to the 12<sup>th</sup> ranks were averaged as the threshold value [blue bars in **(d)**]. **(d)** The two-fold threshold-value was taken as a cut off (horizontal dash line) to judge whether other colonies (red bars) on the same plate grew or not. In this example, the second technical replicate from the second biological replicate (Bio2-Tech2) was evaluated as a negative event (highlighted in grey background).

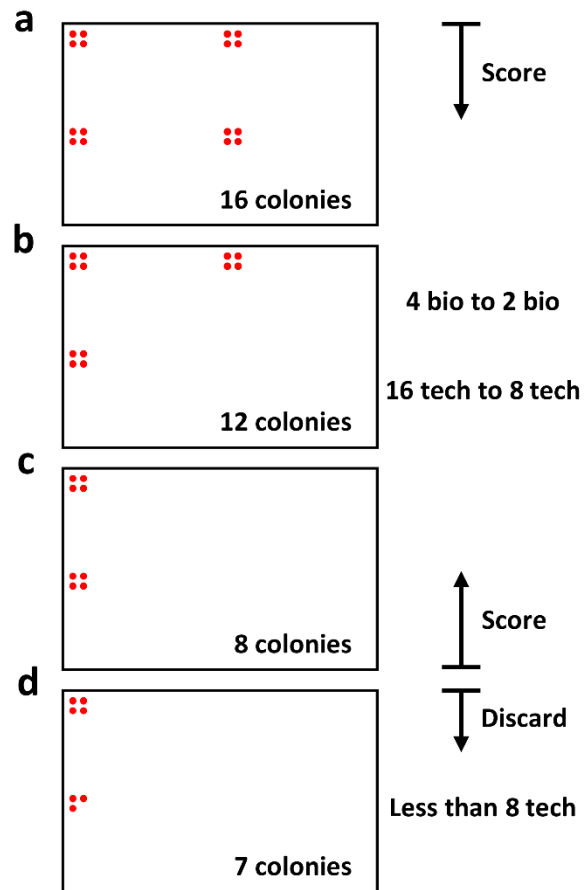

### Supplementary Figure 5

Defining the positive TF-DNA interactions

See Online Methods for details. **(a-c)** Scenarios classified as positive interactions. **(d)** A scenario of no-interaction assignment, because less than 8 colonies grown on the AbA-2 plate.

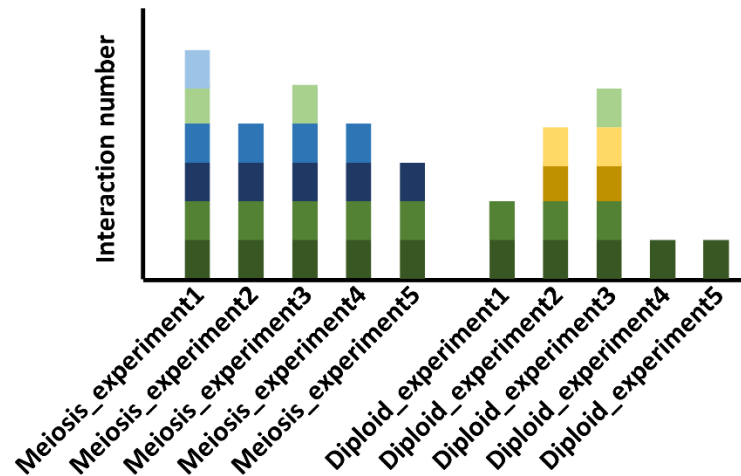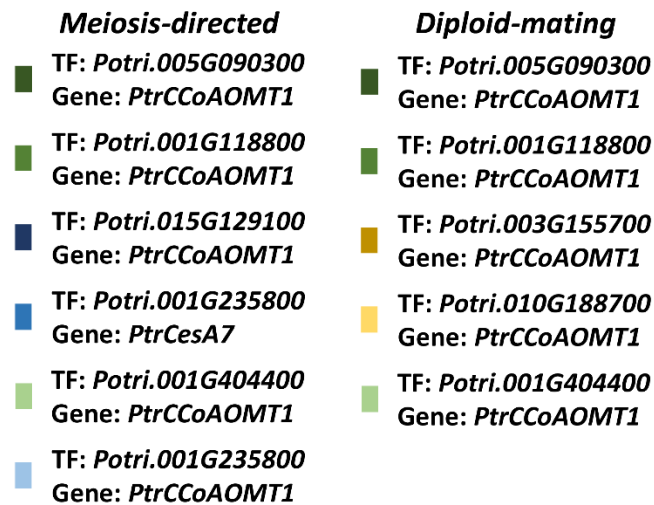

### Supplementary Figure 6

Reproducibility test of the meiosis-directed and diploid-mating systems

Five independent experiments were performed to examine the reproducibility of the meiosis-directed and diploid-mating systems using *PtrCCoAOMT1* and *PtrCesA7* promoters against 46 TFs, which represents a total of 92 possibilities. A color block represents a single TF-DNA interaction event identified by either system. For example, meiosis\_experiment1 identified six interaction events, among them five were also uncovered in meiosis\_experiment3.

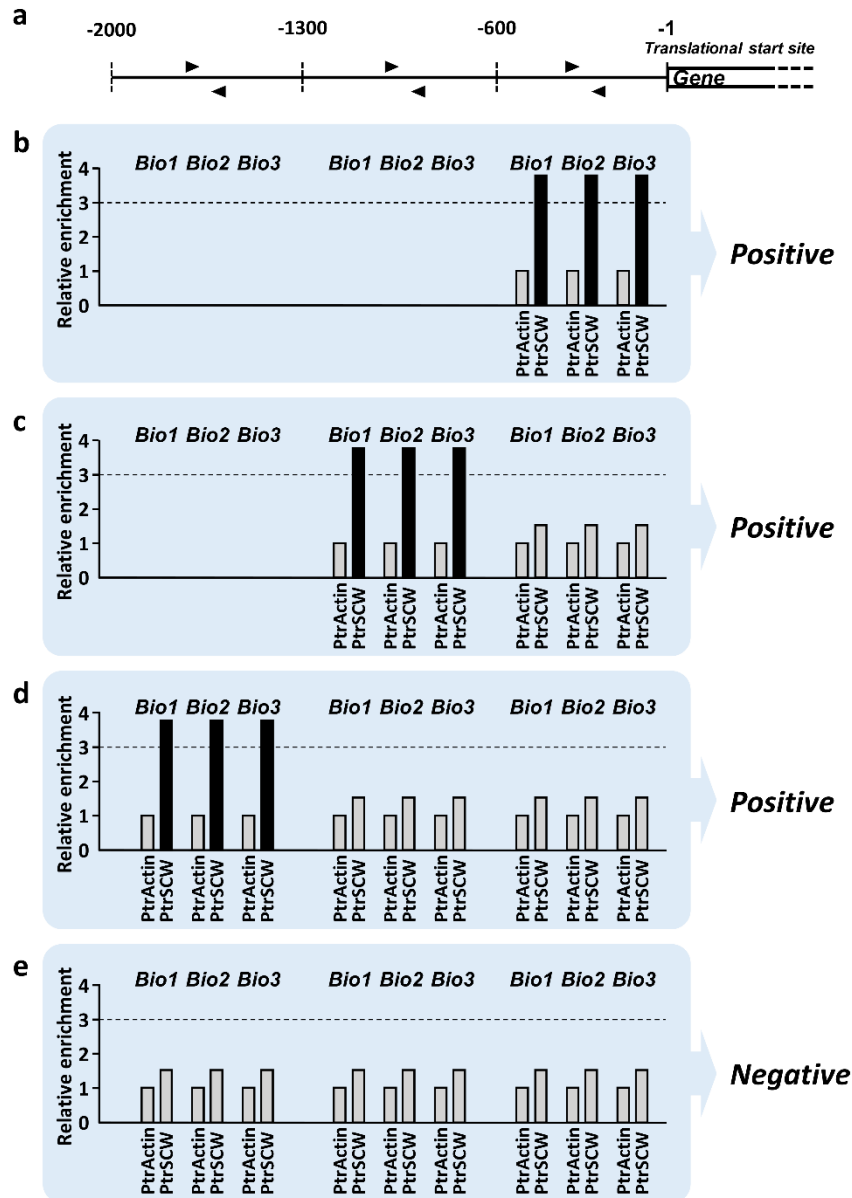

### Supplementary Figure 7

ChIP validation of TF-DNA interactions scored in all Y1H systems

(a) Each DNA-bait was divided into three regions, namely, -1 to -600, -600 to -1300, -1300 to -2000 (counted from the translational start codon) for ChIP validation. Primer sets are shown (black arrows). (b) ChIP-qPCR was done initially within the range of -1 to -600. In this hypothetical scenario, qPCR enrichment of the *PtrSCW* (Secondary Cell Wall genes) is more than 3 folds over that of the *PtrActin* (control) in all three biological replicates (Bio1–3), thus classified as a positive validation. (c–d) Should (b) yield a negative result, the same process was repeated in the range of -600 to -1300. Likewise, the process was repeated, if necessary, in the range of -1300 to -2000. (e) A scenario in which a Y1H scored interaction could not be validated by ChIP.

A

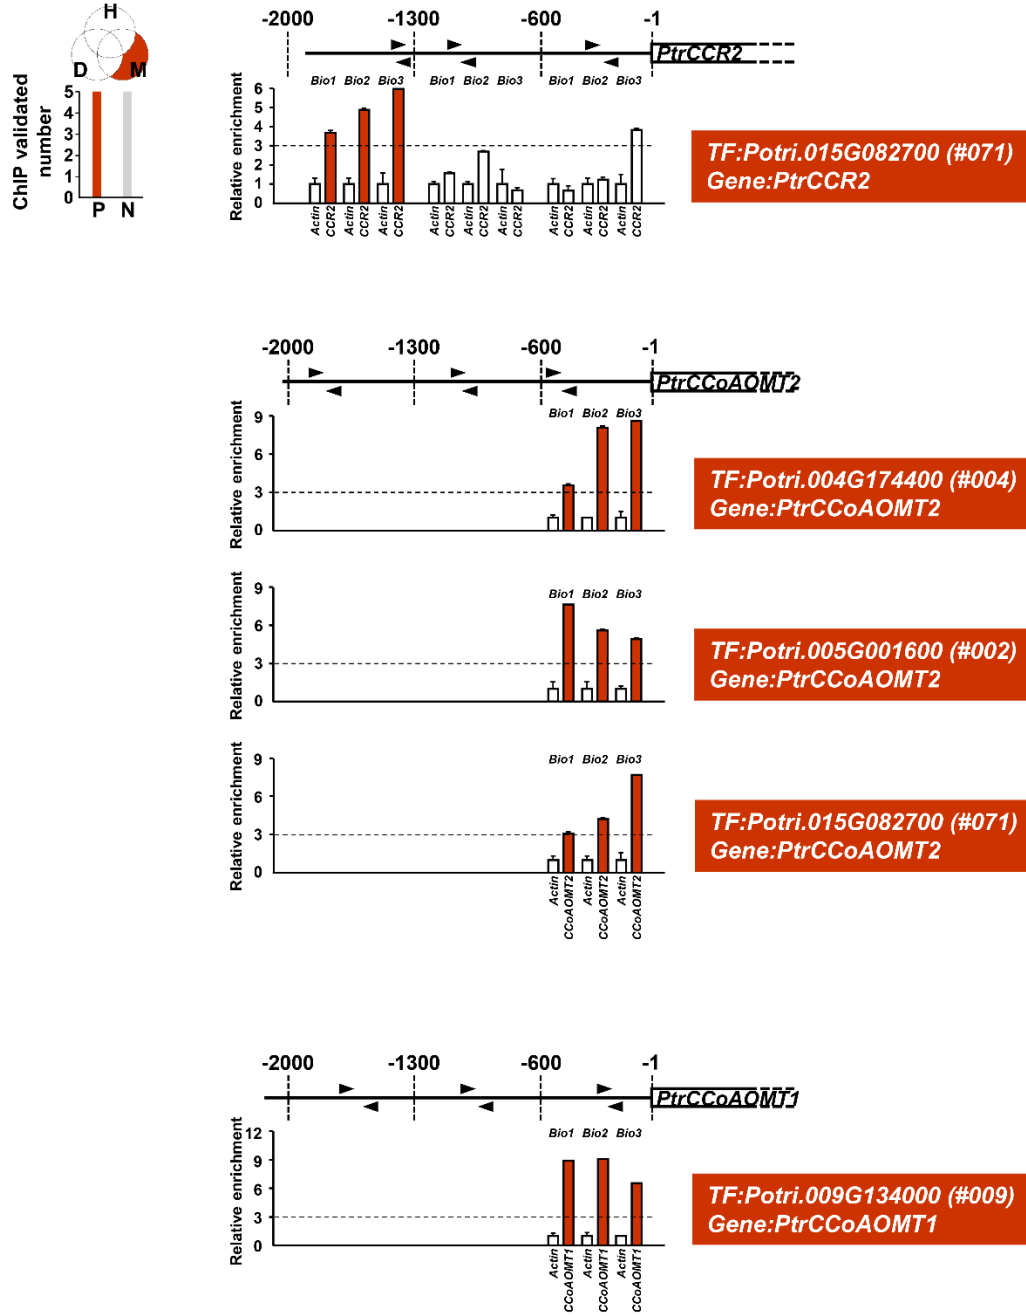

## Supplementary Figure 8

### ChIP-qPCR validation

ChIP-qPCR was used to validate the TF-DNA interactions identified in (a) meiosis-directed system, (b) haploid-transformation system, (c) diploid-mating system, (d) both meiosis-directed and haploid-transformation systems, (e) all three Y1H systems, (f) haploid-transformation and diploid-mating systems. ChIP positive TF-DNA interactions (text boxes in yellow, red, and brown); ChIP negative interactions (grey text boxes).



A

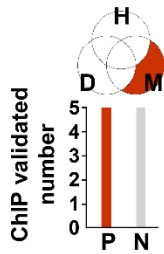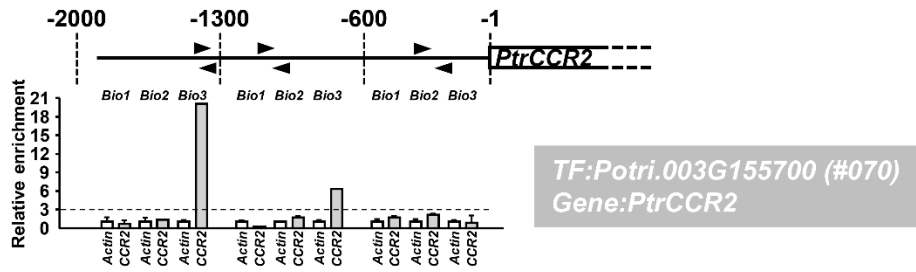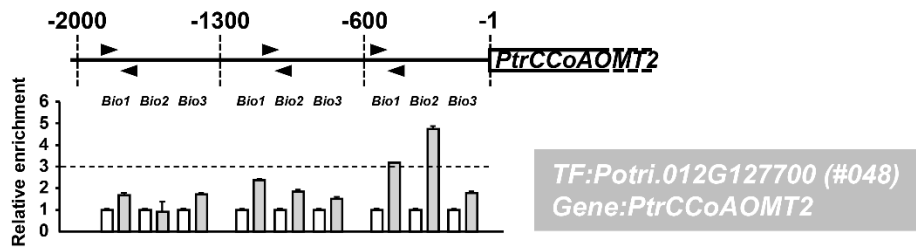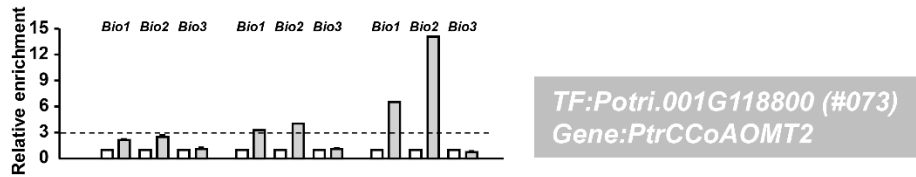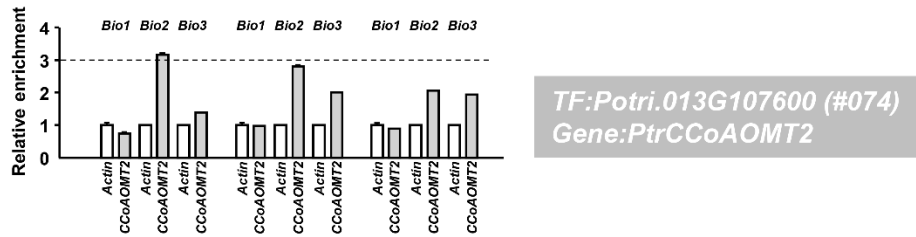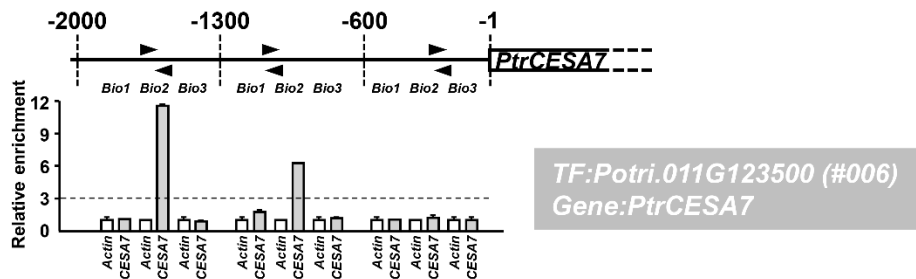

Supplementary Figure 8

Continued

B

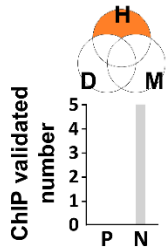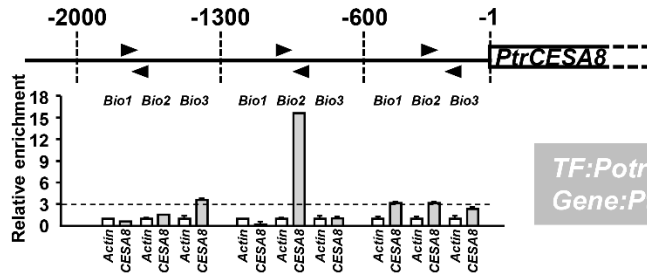

TF:Potri.003G155700 (#070)  
Gene:PtrCESA8

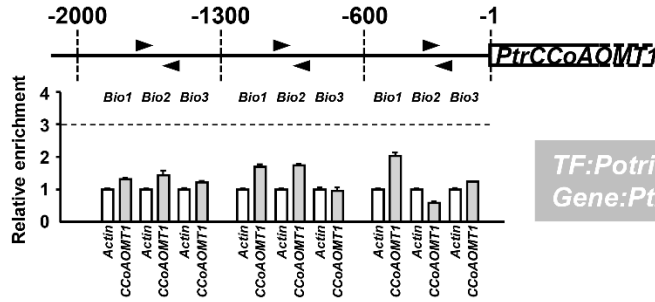

TF:Potri.012G127700 (#048)  
Gene:PtrCCoAOMT1

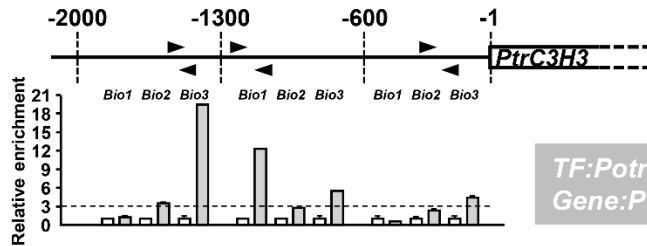

TF:Potri.010G209400 (#053)  
Gene:PtrC3H3

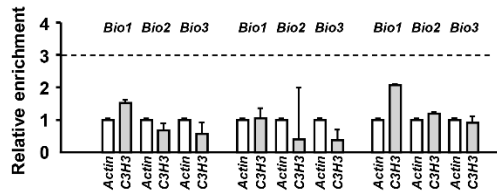

TF:Potri.001G372100 (#078)  
Gene:PtrC3H3

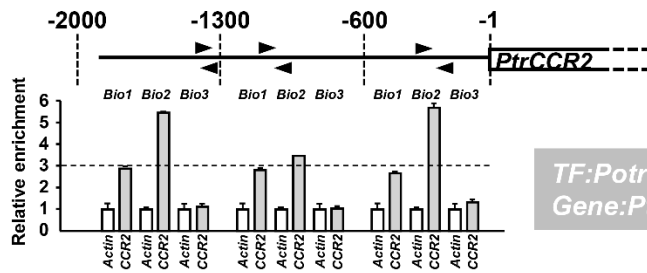

TF:Potri.007G070900 (#084)  
Gene:PtrCCR2

Supplementary Figure 8

Continued

C

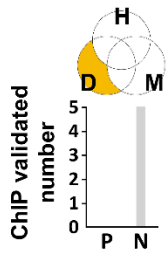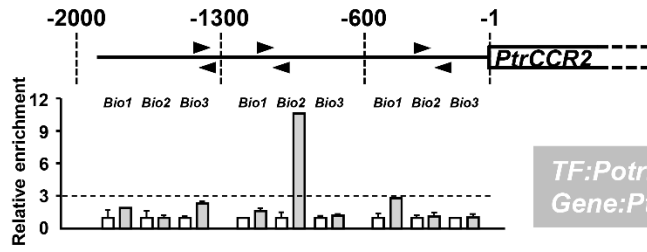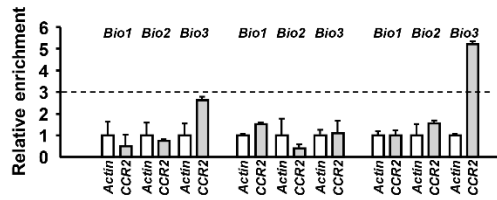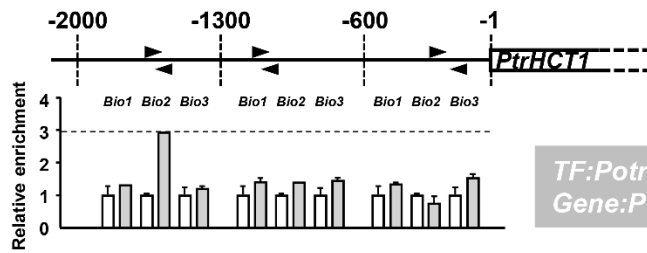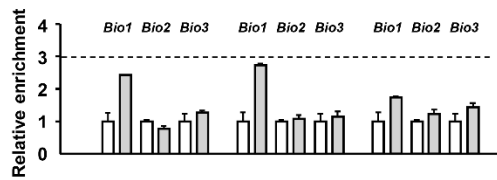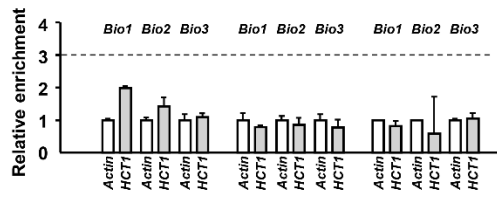

Supplementary Figure 8

Continued

D

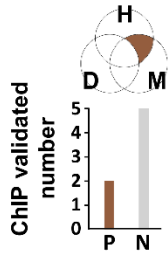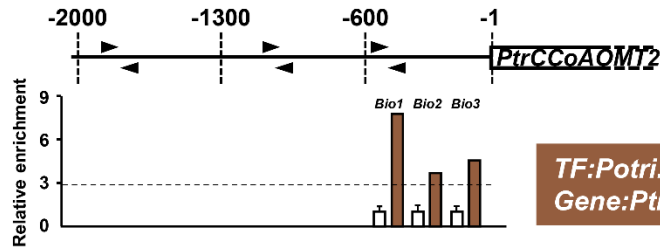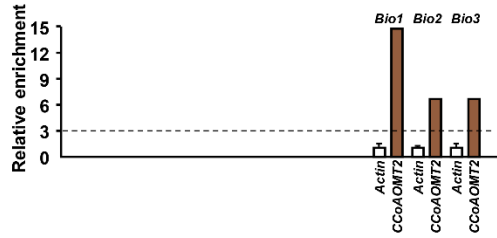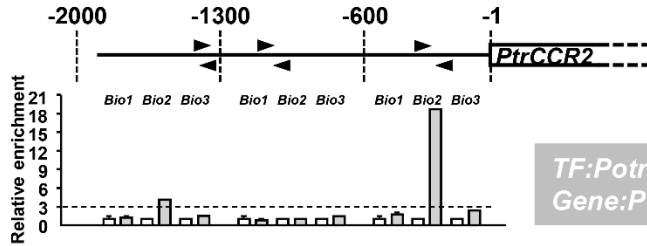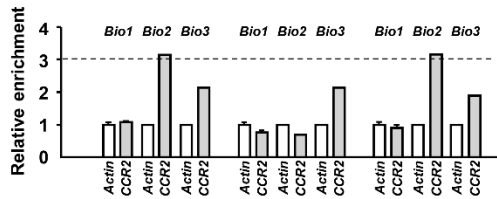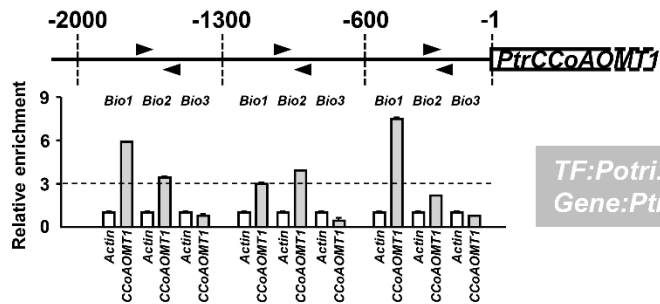

Supplementary Figure 8

Continued

D

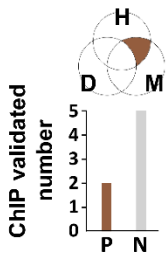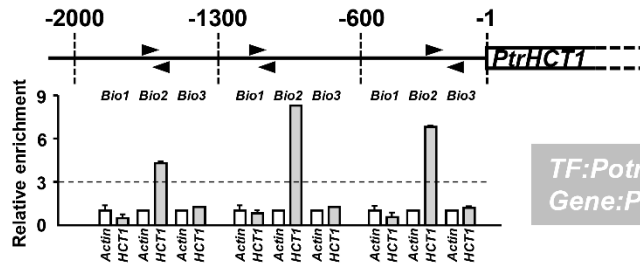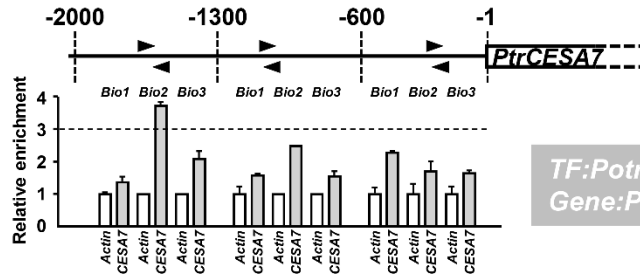

E

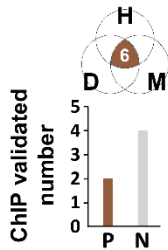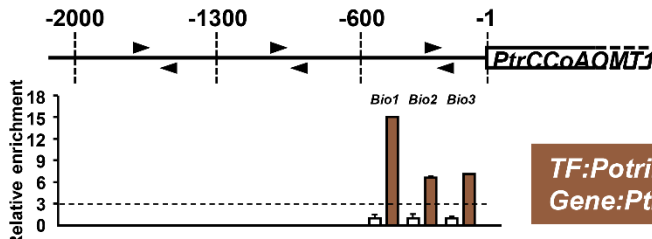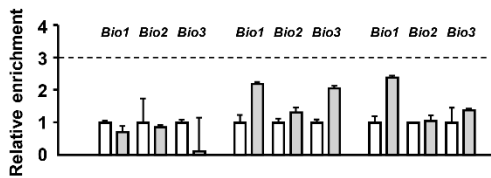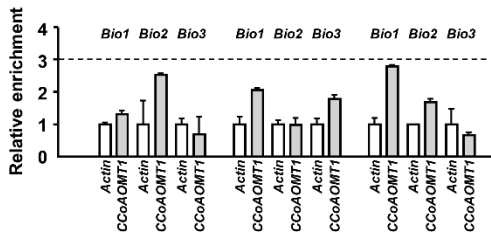

Supplementary Figure 8

Continued

E

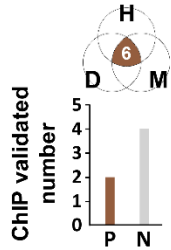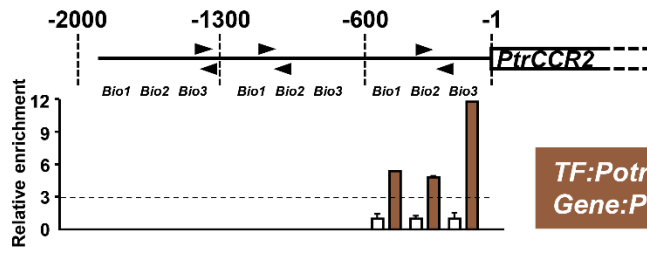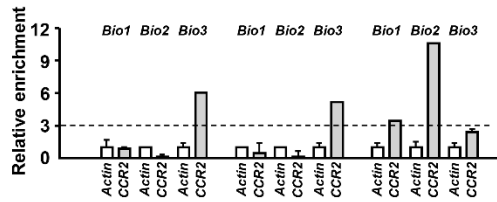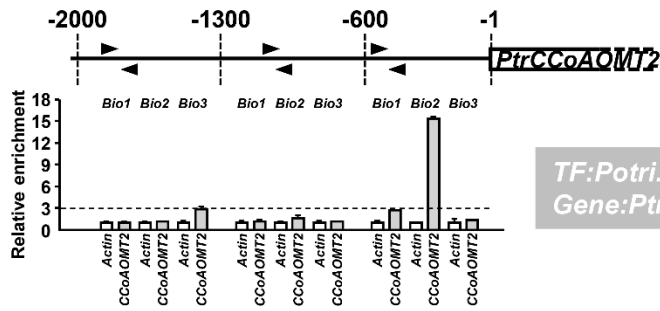

F

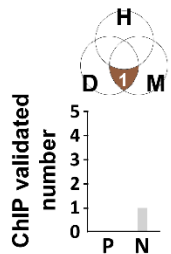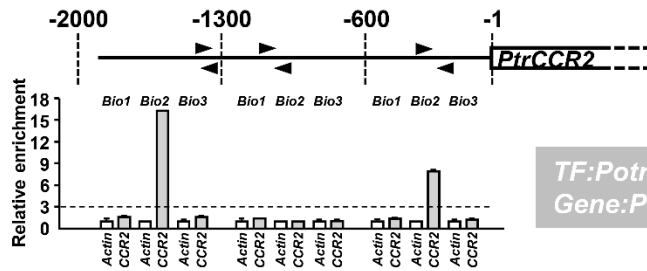

Supplementary Figure 8

Continued

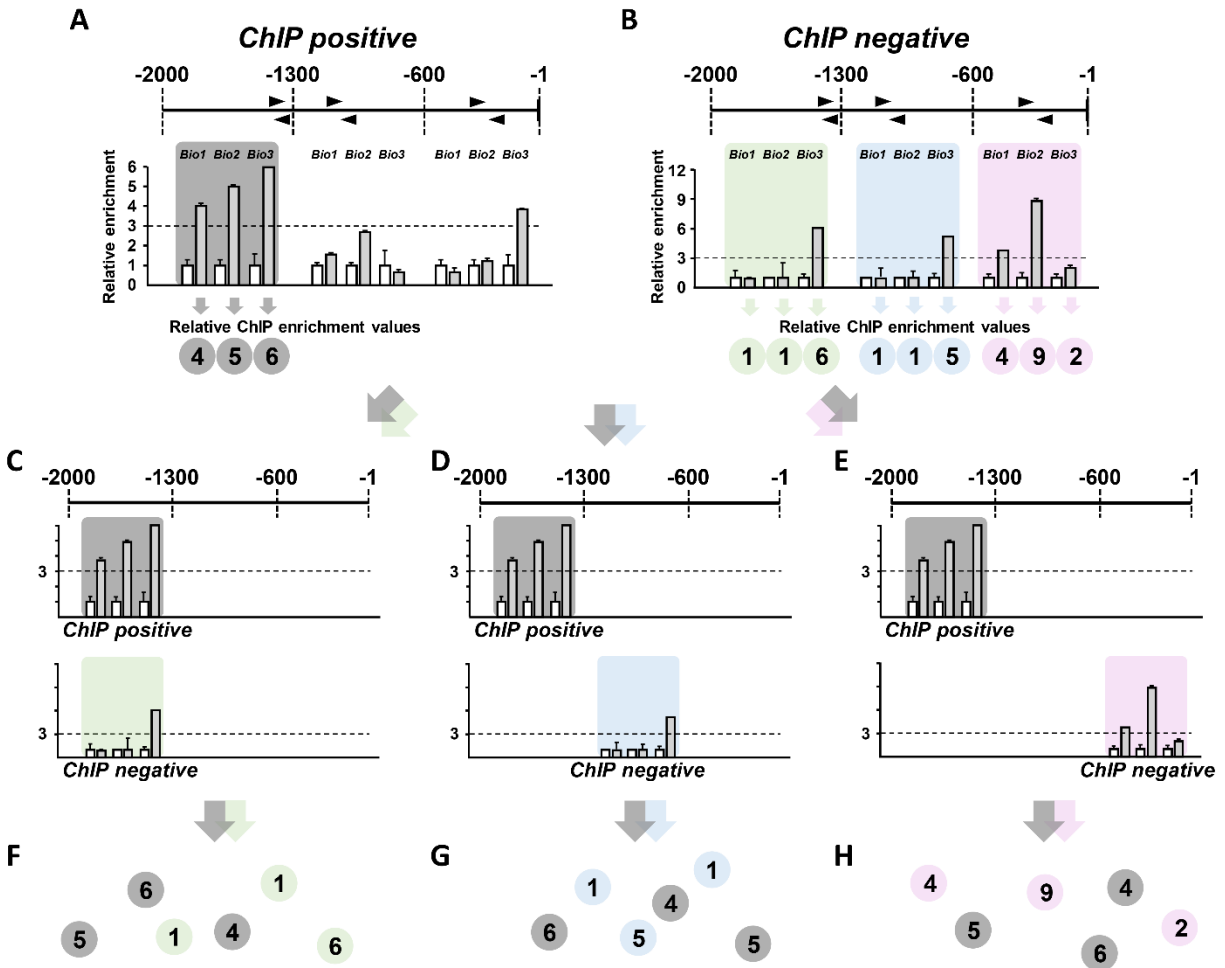

## Supplementary Figure 9

ChIP data selection for statistical analyses.

The scheme of ChIP data selection from ChIP-positives and ChIP-negatives. (A) In ChIP-positives, only the enrichment values (ex. 4, 5, 6) from the positive regions were selected (ex. -1300 to -2000). (B) In ChIP-negatives, the enrichment values from each of the three regions (light green, light blue, light pink) were selected. (C) to (H) The enrichment values of ChIP-positives were grouped with that of ChIP-negatives in each region, (C, F) region -1300 to -2000, (D, G) region -600 to -1300, and (E, H) region -1 to -600.

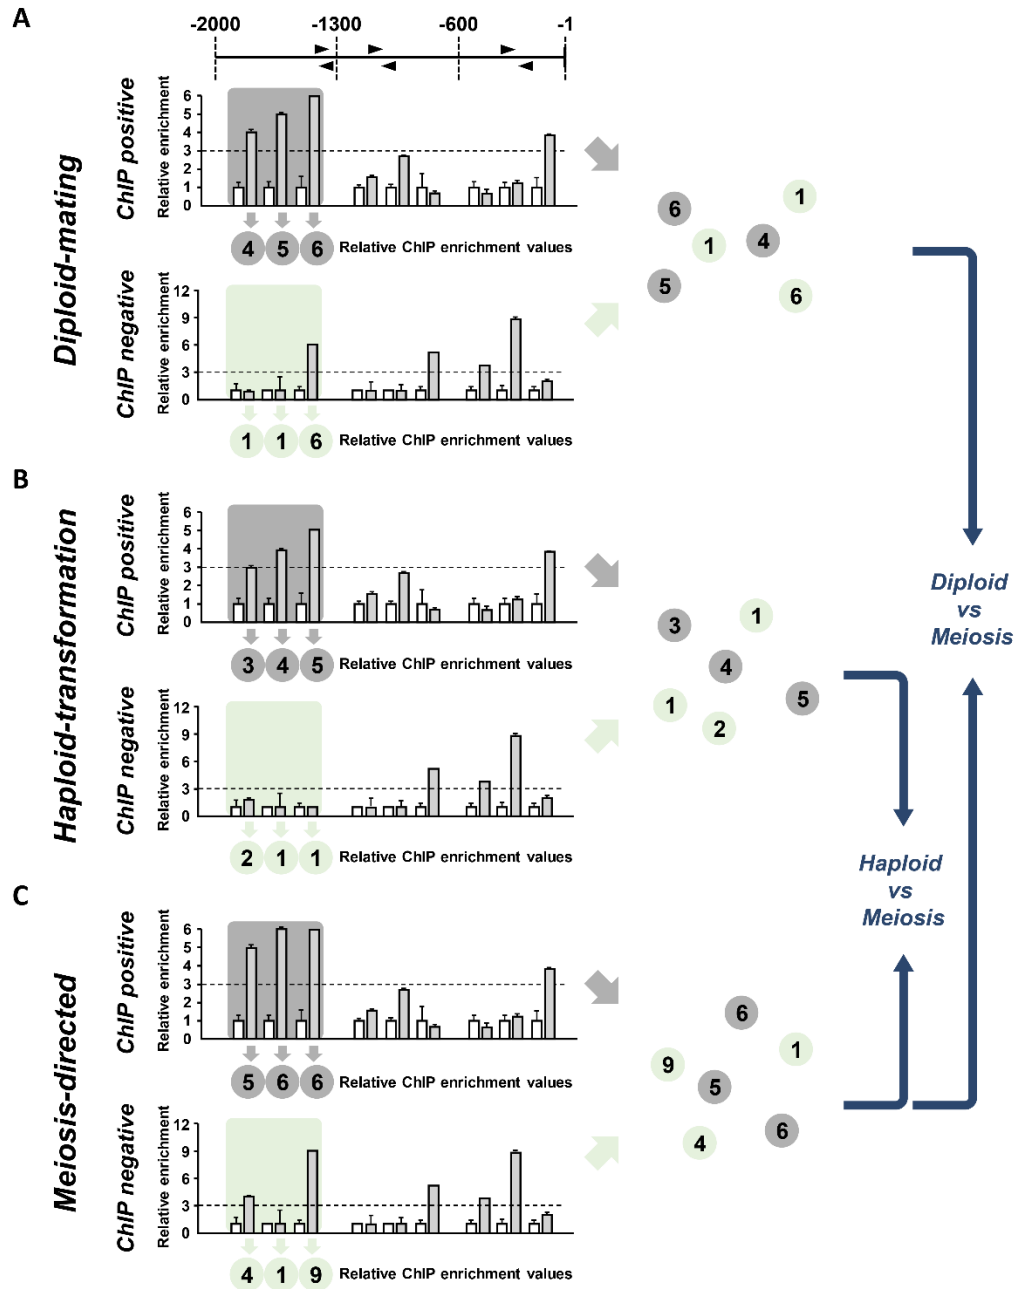

## Supplementary Figure 10

ChIP data selection for statistical analyses among three Y1H systems.

The scheme of an example of ChIP data selection from three Y1H systems. (A) to (C) The enrichment values were grouped using data from ChIP-positives and ChIP-negative (region -1300 to -2000) of (A) diploid-mating, (B) haploid-transformation, and (C) meiosis-directed Y1H systems.



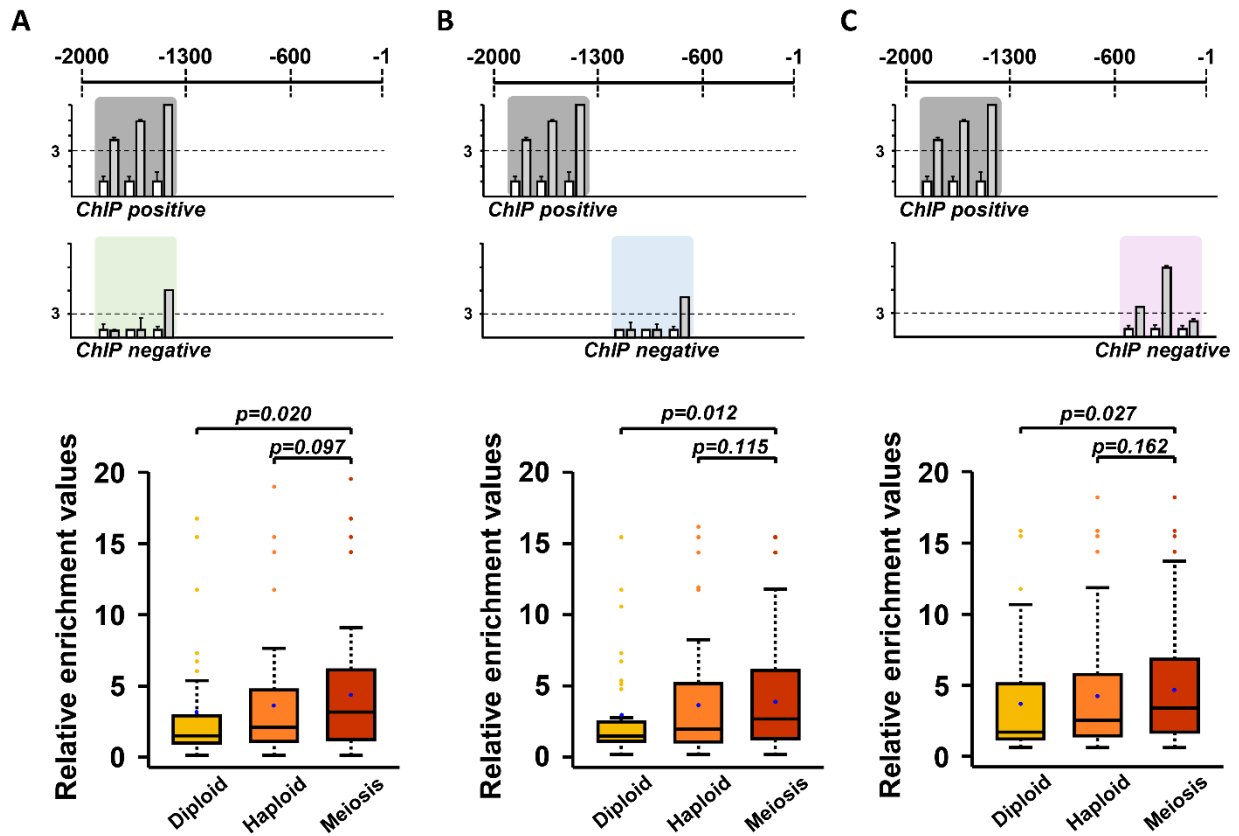

### Supplementary Figure 11

Mann-Whitney U test for the ChIP-PCR enrichment of all three Y1H systems

The ChIP relative enrichment values were statistically analyzed using Mann-Whitney U test for all ChIP-PCR validated data with three biological replicates from three Y1H systems. (A) to (C) All enrichment values were analyzed using Mann-Whitney U test, including ChIP-positives together with each region of the ChIP-negatives from regions (A) -1300 to -2000, (B) -600 to -1300, (C) -1 to -600, respectively. Blue dots in the box plots represent the mean values.

### Supplementary Table 1

Comparison among three kinds of Y1H systems

|                               | <u>Processing time<br/>This study<sup>a</sup></u> | <u>TF-DNA interaction<br/>Discovery rate<sup>b</sup></u> | <u>Processing time<br/>Estimated<sup>c</sup></u> |
|-------------------------------|---------------------------------------------------|----------------------------------------------------------|--------------------------------------------------|
| <b>Haploid-transformation</b> | 15 wk                                             | 100%                                                     | 27 years                                         |
| <b>Diploid-mating</b>         | 2 wk                                              | 60%                                                      | 0.6 years                                        |
| <b>Meiosis-directed</b>       | 2 wk                                              | 124%                                                     | 0.6 years                                        |

<sup>a</sup>Time required for constructing 644 yeast strains in this study.

<sup>b</sup>The TF-DNA interaction discovery rate of haploid-transformation assay was set as 100% for comparison.

<sup>c</sup>Based on our experience, a well-trained postdoctoral fellow can generate ~200 yeast strains per month for Y1H screening.

The estimate is based on building a TRN of secondary cell wall (SCW) in *P. trichocarpa* using all 1301 wood-forming related TFs and 50 secondary cell wall related promoters. In Haploid transformation assay, total  $1301 \times 50 = 65,050$  strains are required, and  $1301 + 50 = 1351$  strains are required for mating and meiosis-directed assays. The estimated time using haploid transformation, for example, is  $65,050/200 = 325$  months = 27 years.

### Supplementary Table 2

See Supplementary Spread Sheet

### Supplementary Table 3

See Supplementary Spread Sheet

#### Supplementary Table 4.

Sequence of 92 TFs

**Yellow highlighted sequence** represents translational start or stop codons

**Red highlighted sequence** represents the sequence which is different from Phytozome (v3) due to SNPs, insertions, deletions, synonymous mutations caused by PCR.

Potri.001G033200.1 (NF-YC family)

**ATG**AGGAAGAAGCTTGATACTCGTTTTCCAGCTGCTCGCATAAAAAAAAAATTATGCAA  
GCTGATGAGGATGTTGGGAAGATAGCACTGGCAGTGCCTGTTTTAGTTTTCCAAAGCG  
TTGGAGTTGTTTCTTCAAGACCTTTGTGACCGTACATATGAGATCACCCCTCAGCGA  
GGAGCAAAGACTATGAATTCCTGCATCTAAAACACTGTGTACAGAGCTATAACGT  
GTTTGATTTTCTAAGAGAAATTGTCAGCAAGGTTCTGATTATAGTCATGGTCACTCT  
GATGCTGCTGCAGATCATAGACCTCTTCAAAGAGAAAGCCCACTGTAGATGAATG  
CAATGACAGTGATGAGGAGCTGAAGAGAAGCAGGATGCATGAGACGAGCCATGCT  
GGCAGCAGCGGCAGAGGGAGAGG**TC**GAGGACGGGGGAGGGGTCGTGGACGAGGTG  
CTCGAAATATAGAAAGAGAGACTTCTAGTCGTGACCTTGAATCCGAATCCTCCACAA  
CCATTCCGCAGAGTGTTAAAAATAACTCGAATCCTGAAGTGGTGATGGACAATGGCT  
CAGAGTCAAAGGAATATGTGATGGAAAATAACATAGCCAGTGATGCTGCCAGTCAA  
GCAGAACGAACTTTGATCTTAATGCAGAGGTTAATGATAGTGAGGATGCAAAGC  
TGCAGCAGCACCAGCTGCCGCCACCACTTCTGCCACCGCTGCAGCAGCAGCACCAG  
CTGCCGCCACCGCTGCAGCAGCACCAGCTGCCGCCACCGCTACAGCCCCTAGCTTAT  
CAGCAGAGCCTGCTGCAGAACTAATCATGAAGAATATCCAGGTTGGTCACTTTCTG  
AGATGGACAAGATGGCTATTGACCCTCTTCAGCTTGCACAACCTCAGCACAAGAGTA  
GATGAGGAGGAGGAAGATTATGATGAAGAAGGA**TGA**TCATGCTATTAGCTGAGGCT  
CTTAG

Potri.001G055000.1 (NF-YC family)

**ATG**GTAGAATCAGAGGAGAACAAGACAGAAACAACAACAACCCGACCCGAATTCC  
CAACAGGCCGGATCAAGAGAATCATGAACTTGACAAAGACACCAACAAGGTCAAT  
GCAGATGCTCTATTCTCGTTTTCCAGCTCCACCGAGTTGTTTCTCCGGTTCCTCGCGG  
AGAAATCAGCAGAAGTTGCAATCGAGAAGAAGCGAAAGATTGTGAACTCGATCAC  
ATCCGAGCCGCTGTTAAAAGACACCACCTACCAGTGATTTTCTTTAGATTCGCTTC  
CTTTGCCAGCTCAGTCATCAGAGAAGCCTGCAAGTGATAAATACCAGTGCTCGCACCG  
TGACTGATAAACCAGCCCCGGCTGGCACGCGCCGGATTGATCAGTTTTTTCGCTAAGG  
CGGCAAGTGAAGAAGTTCCGGTCTGATAAATGAGTCC**TAA**AC

Potri.001G103600.1 (bHLH family)

AGGAGCTGAACTTCCTCTTTGGTTAATTCTCCAAGCTTCATTAATAATCTCACAAGTT  
CCAACCTTGAGTTTCTAGTCTCTGTTGTTTTCTTGAACAAACCTACTTTTGGTATTCA  
GGAATCAAGATTTTAAGCATATGGTTCTTAAGATAGCATGGTTCTTAAGATACTGAA  
TATTCCATCGTCGAAGTTTCTGGTATTTAGAAATGCAGAATAAAGTTTAAAGCAAGA  
TTCTTGTTTTGTGACTGATCTGATAAAAGTGGTGGGTTTTATCCTTCTGATCTTAAAA  
TATGGCTACTAAGCTCCACAACCAAGAGAGACTACCAGGGAACCTCAAGAAACAGC  
TTGCTATTGCTGTCAGGAGCATTCAAGTGGAGCTACGCAATCTTCTGGTCCATCTCAG  
CAAGACAACCAGGAGTGTGGAGTGGGGTGATGGGTACTACAACGGAGATATTTAAA  
ACAAGGAAGACAATTCAATCCATAGAGCTTGATGAAGATGAATTGGGTTTACAGAG  
AAGTGAGCAGTTAAGAGAACTCTACGAGTCACTTTCAGTTGGTGAAGCCAGTCCAC  
AAGCTAGAAGACCTTCAGCTGCATTATCTCCAGAAGATCTCACTGATACAGAGTGGT  
ATTATTTGGTTTGCATGTCCTTCATATTCGACATTGGCCAAGGCTTGCCAGGAACAA  
CATTAGCAAATGGTCATCCTACTTGGCTATGCAATGCTCATTCTGCAGATAGTAAAG  
TATTCAGTCGCTCTCTGCTAGCTAAGAGTGCATCAATTCAGACCGTGGTTTGCTTTCC  
ATTTATGAGAGGTGTGATTGAGCTGGGTGTGACTGAGCAGGTTTTGGAGGACCCAA  
GTCTCATTAAATCACATAAAAACATCATTCTTGGAGATCCCATACGCAGTAGCTGCCA  
AGAATTCTAGTGCAAGAAGTGAAAAAGAGCTTGCATGTGCCACCTTCAATCGTGAA  
ACACTTGACACCAAACCGATTCCAGTTATAGGATGTGGAGAACTAGACATAACTTCC  
CCTAACCGCAATTCAAATGATCAGCCGGCTGCAGATTTGATTATGGTTGAAGGGCTA  
AATGGAGGAGCTTCCCAAATGCAAAGTTTGCAGTTCATGGATGATGACCACAGTGTG  
CATCATTCTTGAATTCTAGTACTGCATATCTCAAACCATTGTAGATCCTGTGAAG  
GTTGTTCCATTTTTGAAGAATGTGAAGGTAAATAACCAGAATCTTCTGGATGTTCAA  
GACTGCAATCACACGAAGCTGACTTCGTTGGACCTTCAAAGGAAGATTTTCATTAT  
CAAAGTGTCTCTCATGTCTCTTAAAGACCTCCAATCCATTGATTTTAGGACCCGATG  
TCCAGAATTGTCACCAGGAATCGAGCTTTGTCAGTTGGAAGAAAGCAGGATCGGTG  
CATACTCACAAATTGAAAAGTGGAACTCGACAAAAAGTACTAAAGAAGATACTACT  
TGAAGTTCCTCGGATGCATGTTGATGGCTTGCTTGACTCCCCAGAATATAATAGCAA  
TAAAGTTGTAGTGGGGAGGCCAGAGGCTGATGAAAATGGTGCAAGCCATGCATTAT  
CTGAGAGGAAGCAAAGAGAAAAGCTGAATAAAAGGTTTATGATTCTGAAATCAATT  
GTCCCTTCAATCAGCAAGGT~~AGT~~TGATAAAGTATCTATACTAGATGAGACC  
ATCGAATACCTTCAAGAGCTTGAAAGAAAGGTTGAAGAGTTGGGATCTAACAGGGA  
GCTATTGGAGGTTCTTACCAAAGAAAACCCCAAGATACTGCGGAGAGGACATCTG  
ATAACTATGGCAGCAATAAGATTGGAAATGGAAAACATTCGTTGACAAATAAGAGG  
AAGGCTCCAGACATTGATGAAATGGAGCCAGATATCAACCATAATGTATCAAAGA  
TGGTTCAGCTGAAAGTATAACTGTCAGCGTGAATAAAGAGGATGTTCTAATCGAGAT  
CAAGTGTCGTTGGAGGGAGGGAATATTGCTGGAGATAATGGATGTAGCTAGTCATC  
TCCATTTAGATTCTCACTCGGTTCAATCATCTACCATGGACGGGATCCTTTCTCTGAC  
TATCAAATCAAAGCACAAAGGGATTGAATGCTACATCAATTGGCACAATCAAACAAG  
CCCTTCGAAGAGTTGCTGGGAAATGT~~TGA~~AACTTATTCTCAAATCGATGACAGTATG  
GTTAGAATTCAGTCTCAGTTGTAAAATTCCGTGTGCG

Potri.001G118800.1 (MYB family)

CTCTTTCTCTCCCTCCATACATGGCTGTGCATATTTATTTATATATAAGCACTTGGGG  
TGGGAAATATAAAGGTGGTTGTGGGGCTTTGAGTCTTTACAAGTAATAATATTGGCG  
AGGTTTAATTTGTTTTAGTGGTGTAACCTTAGCTATAGTCAGCGAGCTAGCTAGTAC  
TGTGTGCAGT**ATG**GGAAGGCAACCTTGCTGTGACAACTTGGGGTCAAGAAAGGTC  
CATGGACAGCCGAGGAGGATAAAAACTCATCAATTTTCATCCTCACCAATGGCCAG  
TGCTGTTGGAGAGCTGTCCCTAAGCTTGCAGGACTCCGACGATGCGGCAAGAGTTGC  
CGGCTTCGTTGGACTAATTATCTTCGCCCTGACTTGAAGAGAGGGCTTCTTACTGAA  
GCAGAAGAACAGCTGGTTATCGATCTTCATGCTCGTCTTGGCAATAGGTGGTCCAAG  
ATTGCAGCTAGATTGCCTGGAAGGACAGACAATGAGATTAAGAATCACTGGAACAC  
TCATATCAAGAAAAAGCTACTCAAGAGGGGAATCGATCCTGTTACACATGAACCCTT  
GCACAAAGAAGCCAGGCCTGAAGAAAGTTCATCGTCTCATGCTGATATTTTGCCGGA  
ATCTAGTAACAACAATGTTATGCAAGAAAATGATGGCATCGTTATTAATTCGGACGA  
TAATCCAAGATCACCTACTGAAAATTCTTCTAGTCCAGAGGATTCGATCTTGTTAGA  
TAGTATTTGCAATGATGAAATGTTACTGAACAGCTTGTGGATGGAAGAGCCTCCGCT  
AGTTGATGCATCATGGAACAATATAATTCCTCCGGCTGCGGCGAATACTAACGACGA  
CACGGGTTATCCTTCATGGGAGGAAAATTACACATGGTTATCGGACTGTCAAGATTT  
TGGCGTTCACGACTTCGGGCTCGAATGTTTCGACAGCATGGAATTGAGCGCACTTAG  
CACATTAGAGATGGAACACAAGCAC**TAG**

Potri.001G157700.1 (C2H2 family)

CCTTCTTCTCTGCAAAGCAAGCTTTATAGAAAGAGGCTAGAGAGAGAAAGACAGCT  
AAAAAAGAAAGCTTTGATCTTTGCTTGCTAACTGCTTCA**ATG**GAGAGGCATAAATG  
CAGGCTCTGCGTTAGAACTTTTCCGAATGGCAGAGCTTTAGGTGGTCACATGAAGGC  
CCACTTGGCAGCAACTCGGCCGCAACTCGGCCTTGATC**GTAATGAGTCGTCCTCTTC**  
**CTCGTATTCTTCTTCTGCTGGTGAAGAAGAAG**TGCAAGAAGAGCAAGAAATCATCA  
AGATCAAAGAAGCAGTTGAAGAGAAGTCTCTGGCTTATGGATTGAGAGAGAATCCC  
AAGAAAAGTTGCAGGCTTGCAGATCCTGAGTTCTCTTTTGCTGTTGATACTGGGTCT  
GTTGTTGTGCAAGATAGGGAGAGTGAGACCGAGTCAAGAAACCCAACTCGAAGACG  
ATCCAAGAGGATCCGTAAATCATGTGGTTTTGGAGAGAGTCAGAAGCAGGATTTG  
ATGTCAAGAAAGTAGTAGACTTCAAGAATCCGAGTTGGGGCGAGTCATCATCACCA  
GCTGAGCCGGAACCGGTGAGTTCTGTTTCTGATACCTCTCCTGAAGAAGATGTTGCT  
AGGTGCCTTATGATGTTGTCAAGAGACGTTTGGATGAGAAATGATGAAGAAGAAGT  
TCAAGAACAAGGCGGGAAAGATGGAGAAAAGTCGGTTCGATATGTTGGAAGAAGCA  
GAGGAGATCAAAGTCAACAAGATTCGCGGGAAGTTTAGATGTGAGAAATGCATGAA  
ACTGTTTCGATCTTCAAGAGCATTGAGCGGTCATAAGAGGATTTGCTCGTTAAATGC  
AACTGAAGCAAGAAATATTGCCGCTGCAGGTGATGCTAATGACAGAATTTTTGAGT  
GCCCCATTGTCTCAGAGTGTTTGGGTCTGGGCAAGCACTTGGTGGACACAAAAGAT  
CGCATCTTATAGGTTCTTCAACTAGTACTAATGCTGTTGCTGAAGTATCAACTAACT  
CGAGAACAATATGATAGATCTTAACTTGCTGCTCCAGTGGAAGATGATGAATTCAG  
TGTGGTGTCTGATGCA**TAA**TCCATTAATAGTACTCAAGCACACCTCTG

Potri.001G235500.3 (MYB family)

GAAAATGATGCAAGACGAGATCCGAAAGGGTCCATGGACAGAAAAGGAGGACATA  
CTACTGATCAACTTTGTGCACTTATTTGGAGATCGACGATGGGATTATATAGCAAAA  
GTATCAGGTTTGAAGGTGGCGGGAGACACGTAA TAGGTATGAATGTATGGCGATGG  
GTGGTTTTGTAAAGGAACTACCTTTAACAACCAAGTTTTGTTGTAGGTTTGAACAGG  
ACAGGAAAAAGCTGCAGGTTGCGATGGGTTAATTATCTCCACCCTGGTCTTAAGAGA  
GGGAAGATGACACCTCAGGAAGAAAGACTTGTGCTGGAACCTCACGCCAAATGGGG  
AAATAGGTTTGAAGATATGATCAGAAGTTTGCTTCTTTTTTTCTTCTCTCTTAATTTAAT  
CATAATCCAACCACTTATATAATTTACTGTTATTTCCCTCCATGATGATTCTTAGATAT  
TACTGAGAATTTTCCAATTCTGATTTACAACTTCCCTTTAATTTACTATGCCTGTTT  
TAGTATAAAGCTTATATAACCATCATCTCTTTTGCCTCATAATTTCTCAGATTGTGT  
TGATCTTCACTGAGTATTTGGTGGTAAAAAATTTATC ATGTGCAGATGGTCAAGAAT  
TGCTCGCAAATTACCTGGACGTACTGATAATGAAATAAAGAACTATTGGAGGACTC  
ATATGCGGAAGAAGGCTCAAGAGAGGAAAGGGGCCATGTCCCCTTCACTGTCATCT  
TCAAAGTGTTCCTTTCATCCAATACCACTACAGTGAATTCATCACCTCTTCCACGAA  
CTGGAGAAACAAGTTTCTATGACACAGGAGGGCTCGAACAAGTTGCTTTAGCAGGG  
AAAAATAGCGAGGCAGTTCAAGGAGGTGAGAAGGGATACTCGATGGATGACATATG  
GAAAGACATTGAAAACACTATTGAACCAGTTTGTGATGGGTTTAGTGAAAAAGGTT  
GCAATTTTTCTTGTCTTTCGTTGGCTTCGCCGTCATGGGACTATTTCCAGACACCCT  
TTGGGGTTTCGGTGAAGAAGAGGGCAAGATATTTCTCCCTTACGACGATGGGACAA  
CGATTTTGACTGGCT TAA

Potri.001G235800.1 (C2H2 family)

CAGCCACCTTCTTCTTTTGAAGCTTTATACTTTGTTGTTCTTGCTCATCGTATAAACA  
CAAATCATACTATATATCTAATCTATAGATTTAATTACC ATGAAGAGAGATAGAGAA  
CAGGCAGAGATAGACTTGGCCAAATGCTTGATGCTACTTTCTAAAGTTGGCCAAGCT  
GATCACGAGATACTAATAATTATAGATCAGCAGCAGCAGCAGCAGCAGCAGCAAC  
GGCAGGGGCCGGGGCCGGGGCCGGTTCGCTCATTTTCATGCAAAACATGCAACAAGA  
ATTTCCCTTCATTTCAAGCATTAGGAGGCCA TCGTGCAAGTCACAAGAAACCAAAAC  
TCAAGGAATCAACTGGGAACTTGTTGAAGCTGCCTAATTCGCCTTCAAAGCCAAAAA  
CTCACCAGTGCTCCATTTGCGGCCTTGAATTTCTCTCGGGCAAGCACTTGGAGGTC  
ACATGAGGAGACAT CGGGCGCCT CATAATGTTGATAACCACCAGTACTAGTAGTAAA  
GATCATGAATTGGC AGC TGTGACTCA CCGCCTTTCTTACCCGCTGTCCCAGTTTTGA  
AGAGATCCAATAGCAGCAAGAGAGTTCTGTGCTTGGATTTGAGCTTGGCCCTGCCTA  
TGTATCAGAATGACTCGGAGTTGCAGTTAGAGAAGGTCGATCGTCCCATGTTGAGAT  
GTTTTATC TAA CCTAATTTGGAGCTTGGACATAATTTTTTTCTCTCCTTATTACCAACTT  
CTGCTACTATGTAGTTGGG

Potri.001G249900.1 (C2H2 family)

TGCTATGCTATACTTTCTCCCTTGCTTCTTCCATCATTCCCTTCTCACATGACTCCCCCT  
CTCTCTAGGACAGGAATGCCGATGTCCTGAAGAATTACCAGAGCTCAAGCTGATTCC  
AAAATTAACAATGCAACCAATAGAGGTTTAGTCTTCAACAAATTCCTCTCTTTCT  
TTATCCTTCTTCTCCATCTTGGTTGCTTTATTTTCAAAGCCAAATTAGATGATCGCCA  
TCCAGCCAAGAAACGCAAAAAAGTCTCTCCTCTTGCTCCCATTTCTTCTTCTCATTCT  
CGCCTAAAACCCACAAAGCTCTCTCTTCCCTCTTGGTCCTACCTCAAAGCATTTTCT  
CTGGTAAAACGTCCAAAACCCAAACTCAACCTGCAGCTCCGACCCTAACCTCAGCA  
AGATCATCACAGCAATCCATTGTCTCCATGATCCTACCTGATCAAACCTCACTTGTCC  
GAACTTCCACCAAGGAAAAAGTCAACTGGGTCTGCGAAGAACCCGACATCTCAAC  
AGACCACCAATTCTTTCCTTTGAGAAATGATATTTTTCCATGCACAGCTTGCGGTGA  
AGTTTTCCAGAAACCTCAGCTTCTTGAACAACATCAAGCTATCAAACATGCTGTCAC  
ACAGCTTCTAGACGGTGATTGAGGCAAGAATATAGTCGATATCATATTTAAAACCTGG  
ATGGTCTTGTAAGGAGAAGAGCCCAGAAATCCGTAGGATTTTGAAGATCCATAATA  
GTCCAAAGATATTGTCAAGATTTGAGGAGTACAGAGAGTTTGTCAAACCAAAGCA  
GCGAGAAACAGTCCTATCAAGAGACGAGATGAGAGGTGCATTGCTGATGGTAATGA  
GCTCTTGAGGTTTTTCTGCTCAACTTTTATGTGTGATTTAGGACTGAATGGGGATTCT  
AGTATTTGTAACCAGCAATATTGCAGTGTTTGTGGGATAATCAAGTCTGGTTTCTCA  
CCAAAGATGGATGGAATCTCTACACTGTCTACTAGCTGGAGAGCACACATGGCGTTC  
CCTGAGGAGATTGAAGAGGAGTTCAAGTTCATGAACGTGAAACGGGCTATGCTAGT  
CTGCCGGGTCGTGGCGGGTCGGATCGGGTGTGACTTGGACGAGGATATAGACAAGC  
AGGATAGTGGGTCTGATTCTGTCTGGGAAGAGGTGGCAGTGGGATCCACACGAGG  
GTGGACGAGGAGGAGCTGTTGGTGTAAATCCAAGGGCTGTACTTCCCTGCTTTGTT  
ATTGTATATACTGTGTGAGTGTGATCATGGTAATAGCGTCTGATCCCTTCTGCTTGTG  
TTTTTAATTTTGATGGATTTGTTAAGCGTGATGTGTGGTGGTATCATGGCTTTTGAT  
TTACTTTCTTACTTGATCCGTGACTGTGACCAAACATGGTCAGTTGGTCTCGACCC  
CATTAC

Potri.001G257600.1 (NF-YA family)

TGAAGGCATGCGGTCAAAGCCTGAGAACACAAATGGTCTAGATGCTGATCTGAAGG  
ACATTGAATACACCGTTAACTCTGAACCCTGGTGGCGCAATATCGGTTATAGTTCCA  
TACCTCCTGCCATGACTGGGGGAAATGCATCCAACCTTAACCACACCAGAAGGACAT  
AATGGTTCAGAATCAAATGATGATCAGTCTCTGTGCGAGTGGTAGATTGAACGAGGA  
AGATGCTGATGCTAACAAAGATTCCCAAGCCACTGCATCGTCTCAATTAGGGAATGG  
TTTACATTACCAAATCTTCAGAGTGTTGTGTCAAGTATGACTAGAACGCATGATGG  
CCTCTCCCAGTCTCCACAGTTTGTGAGCTTGTAGTCACTCTATTGCATGTGCATCGAAT  
CCATAACCAGGATGCGTATTACAGCGGAATGATGGCTTATGGACATCAGCCTCTGGGT  
TACCCTCATTGTTGGAATGCCACATGCCAGAATGCTCTTGCCCCTTGAGGTGGCTC  
AGGAACCGGTTTATGTGAATGCCAAACAATACCCGGGGATTATTAGGCGAAGACAG  
CAACGTGCAAAGCTGAGGTTGAGAAGAAGCTGATAAAATCTAGAAAGCCATATCT  
TCATGAATCTCGGCACCAGCATGCTATTAGAAGGGAAAGGAGCTCTGGAGGACGTT

TTGCGAAGAAAAGTGGTGATGATGCTTCCAAGAACACATCTGAAAGAAAGCTCAAT  
GGTTCTGGTCCACTTCGTGCATCTCAGTCAGGGAGTTCATCAGGTTCTGAACCATTCT  
CCTCTGACTCTGTTGAAACTTTGAAATCCTCTGATGGTCAAAAAGAAGCAAGGGCGT  
CCCAAGTGCATGACACTTTTGAAGCTTATGGGTATGCAAATAGAGATGGCCATTATC  
AGAACCACCATGGCTTGAATCCTCTACATATGGCCTGTACTTGGGTGAAAACAAGG  
ACGGAGACCGTTCACGTGAAAACGAGGATGAAGATCATCCAGGCCGGCAGCTGAGG  
AAGCAGGCCAAAACGTCTTCTGCCACCAGTGAACCGTGCATGCTAAGTGGATGCC  
AGGACTGGAGGGTTGATTCA

Potri.001G266000.1 (NF-YA family)

CGTGAATGATGCCGGCAAATCTGAAAAAGAAGATCGACGTTTAGACCACAGTGGA  
CAGAGCCTGTTCCAATCAAACGTTTACTCCAACCTTGGTGGCGTGAAGTGGGGAAC  
AATCCCTCTTTGGGCGAAACTGCATCGAAGTTGTCTTCAGTGGAGAACCTGAACGGT  
TCTCTTCTGAATGCAGTGACACAATCAAAGTTAATACTGGCTTACAGAAAGGAGCT  
ATATTGAACAAAGATACGCAGACCGATGTAACATCACTATCTGATGAAGGTACTGG  
GCAACACCATCTCAATCATGTCCCATCACCAACAACCTGTTACTATGGACGGACACCT  
TGAACCAAATTCCCAGATGGAACCTTGTGGCCACTCAATTGTTTTGACTTCACATCC  
ATATACAGATCCACAGTACGGTGGGATCTTTGCTTCGTACAGACCACAAGCTATGGT  
GCCTCAATTTTATGGAATGACTCACGCCAGGATGCCTTTGCCCTTGAAATGGAAGA  
GGAACCTGTTTATGTAAATGCAAACAGTTTAATGGTATTATGAGGCCGAAGACAGG  
CACGTGCTAAGGCAGAGCTTAAAAAGAAAGCAGTAAAAGTTAGAAAGCCATATCTT  
CATGAGTCTCGACACCAGCATGCTATGAGAAGGGCAAGGGGTTGTGGAGGCCGTTT  
CCTTAATACAAAGAAGCTTGATCATAATGCTGCCAATCCAACGTCAGATAAAGGTAC  
TGGAGATTTGGATTCCCTCCGGTGATCTGCAGGAAGGAAAAGAGTCCATGGTTCAAG  
ACATGCAAACACACGCTTCCCTCCAATTGCCATGGTAATGGCAATGGACTCTCATCAA  
GATATCATTATTATCAGATGATGGCAGCTTCTTGGGTGAGCAGAAGGAAACCACAC  
ATGGGAATGGGGTGTCTAATGGGAACGTCTCCATTTATTAAATTTCCACCTTGAGTT  
GCAAAGCT

Potri.001G268200.1 (C3H family)

GCAAATTCACATGATCGACGACACCCTTCTATTTTCGCTTCCGTTTCATCTCCTCCTCT  
AGTTCTCGTTTTCTTTCTTTCCAGCTACTACTGGTAATCATTATATAATAATAATAA  
CCATTTAAACAAATACAGGCACCAGACAGGCTAGGGTTTCAGTTATCCTTTCTTTTTC  
TTTTCTTTTTTTTTTTAATAAAAATCGTTTTCTTTTCTTTCAAATTAATATCCTTCTC  
CATGCTCTAAAAGGGTACTTTGCAAGTTTTTTGCTCATGGGGCATGCTTGAAAGGGGA  
GCATTGTGAATTTTACATGATTGGAAAGATCCTCCAAATAATATTTGCACCTTTTAT  
CAAAAAGGTATCTGCTCTTATGGTAGCGATGCCGATATGAACATGTTAAACCTTCT  
AGGCCTGAATCTACTGCATCATCTTCATTGACAGTTCCTTGTCAACCTCTGGGCTCAA  
ATTCCGTGTCCCTGGCCCTTCCCTGCAAGAAATGTATCGAATGGGGTGACAACAGTAC  
CGGGTGTTCCTCCAGAGCTTTCAAGTAGACCCTTTATTGCTCCCCTGCACCAGAAT



GGAATTTGGAGTCTGCACAACATGACTTCTTAGAAGATGGTGAGGTTATAGAGCCTA  
GGAATGTTAAACCAGCTGACCGATCTATCTGTTCAATTTGCTGCTGCTGGTAGTTGTCC  
TCGTGGAGATAAATGCCCCATATTCACGGTGACTTGTGTGCCTATTGTGGAAAGCA  
TTGCTTACACCCTTTCAGACCTGAAGAAAGAGATGAACATTTGAAAGCATGCGAGA  
AGAAGCAAAAGAACCTTGATTTGTTAAAATATAGTCAAGAAATAGAATGCAGTGTA  
TGCCTGGATCGTGTACTTTCAAAGCCCACGGCAGCTGAACGAAAGTTTGGTCTGCTA  
TCAGAATGCGATCATCCATTCTGCATATCATGTATTAGGAACTGGCGTAGTAGTTCC  
CCAACCTCTGGAATGGATGTCAATACTTCATTGAGGGCTTGCCCAATATGTGCGAAG  
CTTTCATACTTTGTCATTCCAAGCGTTATTTGGTATTCTCTAAAGAGGAAAAACAG  
GAAATTGTTGATACCTACAAGGCAAACTCAGGTCAATAGATTGTAAACACTTCGCAC  
TTTGGGAATGGGAACTGCCATTTGGAACCAGCTGTTTTTACAAGCATGCATATCGA  
GATGGCCGCCTGGAGGAAGTTGTTTTACGTCATCTTGGAAGCTGATGATGGACAGACT  
GTGATAGCTAAAAATATCTGGCTGTCTGATTTCTCGGTAGCTTACAAATAAGGTGA  
GCTGGTGGTGTTTGAATGTTTTTAAAGGATATCTATCAATGTCAAGACATGCACTCA  
ACTTTATTGTGGAAGGTCTTCAATCTCCAGTGCCGAATCATGTTGTTTGTGAGGATG  
GCTTCTGGAGGAGACTAATTTGTGGGAAGCTGAAAGATGTGCCGTTGTGTCATTAT  
AAGCTGCATCTTAAGTTATTTTGAATAATAAAAACGAAGAACATGTCAAGGCATTGA  
AAGGTTTTGAACAGCGTTGATAAATTATGTACTTGTGAAGGAAAATGATTTGAATAA  
TGGATGTTTGCATTATAGTTTGCTTCCCTCACACCAGAAAGGACGGCGAAAACACTAC  
AGGGTTTCGCCCTAATGGTTTGAATAATTTGAAGTTTTGAGGACAATGTCAGGATG  
TTGTGGTGCATCACTGGTGTTCCTCTGTATAAAAAGTTTTGAACTTTGAGGTATAC  
ATGAGATTTGATACAATGTAATTCATTTGTACCTAAGCCATGTACATCTTATGACG

Potri.001G273700.1 (HSF family)

GCAGAGGTCTAGCAGCAGTACATGTCATTTGCTCCCTCTGGTGTAAATTCATAGCTGG  
TAATGGCTTTTACAGTGGATAGATGTGAAGAGATGGTGTTTACTGTGGAGTCTCAA  
AGGCAGTTCCTGCACCATTCTTAACAAAAACATATCAGCTGGTTGATGATCCTCTTA  
CTGACCACATTGTGTCTTGGGGTGATGATGAAACCAGCTTTGTTGTGTGGAGACCTC  
CTGAGTTTTCAAGGGATCTTCTTCCCAACTATTTCAAGCACAACAACCTTCTCAAGCTT  
CGTCAGGCAGCTCAATACCTATGGATTCAAGAAGGTAGTAGCTGACAGATGGGAGT  
TTGCAAATGAGTACTTCAGAAAAGGAGCAAAGCACTTGTATCTGAGATCCACAGG  
AGAAAAACATCCCAACACCATCACCAGCACTACCCTGAGCAACCACCCAATTTTTTC  
CAACCAGAAGATGGTTTTAGTTGGATCGACCCTCCATTTCAATCTCCAAAATCAAGT  
ACTGACATCCTAACTGCACTCTCAGAAGATAATCAGCGACTGAGAAGGAAAAACTG  
CATGCTTTTATCAGAACTCTCCACATGAAGAACCTCTATAATGACATTATCTACTTC  
ATCCAAAACCATGTAAAACCAATGCCCTATGAGCAAAAGGCTTATAATGCAGCACC  
TAAGCTAATAGAAGTGGGCTTTCATGTCAGGATCAAACCATTTGTTCTAGCATTCA  
AAGAGCTAAGAATGGTACTGTTTTGGGTCAGCATTCAATTGACATTAAGTACTGAGGA  
ATCAACTAGTCCTGTGAAGCTCTTTGGAGTCCCTCTCAGTGGCAATAAAAAGGCTGCA  
TCCAGAAGTGATCGATTAGCGGCAACAATATCGTAGGGTCTCCATTAATTAGCCTGT  
ACCGCAGGTTGTAGTCGTTCTC

Potri.001G372100.8 (NF-YA family)

GCTTCTCTCTCGCCCTGCAAAACAAATACATAAGGAAGTTTGTGTATGAGATTTGAG  
TTTGGGGACTCTGTGTGCATAACAGCCATGACTTCTTCCTTGCATGATCTTTCTGATA  
ATAGTGAAGCTGATGAGCAGCAAAATGAATCAGAACCCAGATTCAGTCTTCATCTC  
CTGCAATGGCACAGGCACACCCGGGCTTCTCAACTCCAAATGTTTCAGTATGCAACTC  
CACAGCTTGGAGCAGGACATGCTATGGCACCAGCAACTTACCCATATCCAGATCCTT  
ATTATAGAAGCATCTTTGCTCCATATGATCCTCAGCCATATCCTCCACAGCCCTATGG  
TGCACAACCGATGTTGATGGGAATTCAGCAAGCTGGAGTTCCTTTGCCATCTGATGC  
TGTTGAGGAACCTGTATTTGTTAATGCAAAACAGTATCATGGTATCTTGAGACGACG  
ACAATCTCGTGCAAAAGCTGAATCAGAAAGCAAAGCAATCAAGTCTCGGAAGCCAT  
ACTTGCATGAATCTCGGCATCAGCATGCACTGAAAAGAGCTAGAGGATGTGGGGGT  
CGGTTTCTCAATTCGAAGAAACAAGAGAATCAAGAACATAATGGAGTGGCTTCAGG  
TGACAAATCACAATCTAATATCAATCTTAATTCCGATAAAAATGATATTGTTTCCTC  
AAATGAC TAGTAGGGATA

Potri.001G404400.1 (NAC family)

CAATCTCACTACTCCATCAATGGAAAGAAGTATTCCTCCACAGGAGGTGCGGGCG  
GTGGTGGTGGCGGTGGCGGTGGCCGCGGCTCGCAACAACCAAACCTTCCACCGGGG  
TTCCGGTTCCACCCCACTGATGAAGAGCTAGTGGTTCCTACCTCAAGAAAAAGACC  
ACTTCTGCCCCTCTCCCTGTGGCGATTATCGCAGAAGTTGATCTTTACAAGTTTGATC  
CATGGGAATTACCAGCTAAGGCCACTTTTGGTGAACAAGAGTGGTACTTTTTTAGTC  
CGAGAGACCGGAAGTACCCGAATGGAGCTAGGCCAACAGGGCAGCAACTTCAGG  
GTATTGGAAGGCTACAGGAACTGATAAGCCAGTATTATCTTCAGGAGGTACACAAA  
AGGTTGGGGTTAAGAAAGCACTAGTCTTCTATGGTGGTAAACCTCCTAAAGGGATCA  
AAACCAATTGGATCATGCATGAATACCGGTTAGCTGATAACAAAGTGAATAACAAG  
CCACCAGGATGTGACTTGGGAAACAAGAAAACTCTTTAAGGCTTGATGATTGGGT  
GTTATGTTCGGATATACAAGAAAAACAACACGCAGAGACCAATGGATCATGATAAAG  
ATGATTCCATGGATGATGTGCTTGGATCAATACCGCCTTCGATATCAGTTGGAAGCC  
ATCAGAATGGAACACTGCATCTTGCAAAAGGAACAACTTTGGGGCATTGCTTGAC  
AATGACCACAATTTATTCGAAGGAATAATCAGCAGCAGTATGGTATCAGAAGCAG  
CAGCTCTTCTTTGTCTCACATGGCCTCTTCAGTAACCAAGCGAGACCTACTTATGCTT  
CCACCCAAAAGAACACTCCCATCACTATATTGGACCGGCGAGGACATGGTTGGCCC  
TTCATCAAGTAAGAGATTTCAAGGGGGTATTAATGGTATGAAATTGTTGTGAGGAC  
CGATGGGAATAGTTCCGTAGCTACCCTGCTCGGTGAACTTCCACAGACACCTCAATT  
GCACCAACAGACAATGTTGGGATCTATGGCAGATGGGATTTTTAGGTCACCATATCA  
AATCCAAGCATGAATTGGTACTCTTAA

Potri.002G042000.1 (bHLH family)

ATGGGTGAGAAATTTTGGGTGAAAGAAGAAAATCGTATGGTGGAAATCAGTGCTGGG  
TGTTGAGGCCTGTGAATTCTTGATCACGTCGGCTTCTAAAAACATTTTGAATGATTTG  
GTTTCGCCGCCTGCTAATTTGGGTGTGCAGCAGGGTCTTGGTAAGGTTGTAGAAGGT  
TCTCATTGGAATTATGTGATTTTCTGGTATGCTTCTGGCTTCAAATCTGGTGGGTCTA  
TATTGGTCTGGGGTGTGATGGGATTTGCCAGGACCCGAAGGGTGGAGGGGTTGTACAT  
GGAAGCTCCAGTGGGGATGGCAAATTGGAGGGAGTAGAGAAAAGAAAAGTGAAGA  
AGTGTGTGCTTCGAAAGCTTCATGCATGCTTTAATGGATCAGATGATGGTAGTTTTG  
CGGCCAGTTTGGATGAGGTTTCGGATGTGGAGATGTTTTATCTAACCTCAATGTATTT  
TACATTTCCGGTGTGATTCAGCATATGGCCCTGGAGAGGCATTCAAGTCTGGTAGGTC  
CATTTGGGCGTCTAGCATGCCTAGCTGTTTGGATCATTACCAATTGAGATCAGTTTTA  
GCCAGATCAGCTGGGTTTCAAACAGTGGTGTTTTTACCTGTTAAGTCTGGAGTTCTA  
GAGCTCGGTTCTGTCAAATCAATTCGGAAGAGCATGATTTTGTGGAGAAGGCAAA  
AGGTTTGTTTGGGGCTTCTAATAATGCACAGGCAAAGGCAGTTCCAAAAATTTTGG  
CCGCGAACTGAGTCTGGGTGGCTCAAATCACGATCAATTAGCATTAACTTTTCCCC  
AAAGGTTGAAGATGAACTGGTTTTCACTTCAGAATCTTATGCAATGAAAGCAACAA  
GCACGAATCAAGTTTATGGAAGTACTTCCAATGGGCGCCCTAGTGACAAGAGTGAA  
GCAAACTGTTTCCGCATCTGAACCAAGCAATTGTGGGTTTCAATACTGAAACAGTG  
GTTGGTGGTTTGGAGCAGCCAAATGATGACTTGTCCCCTCAGGGTGTGAGAGGAA  
ACCAAGGAAGAGGGGAAGAAAGCCTGCCAATGGAAGAGAAGAGCCACTGAATCAT  
GTGGAAGCAGAGAGACAGAGGAGGGAGAAGCTCAATCAGAGATTTTATGCTTTAAG  
AGCTGTTGTCCCAATATCTCTAAAATGGACAAGGCCTCTCTGCTTGGAGATGCCAT  
TACCTATATCACTGATCTCCAGAAGAAGATTGGGGCTTTAGAAAACAGAAAGGGGGG  
TGGTAAACAATAATCAAAGCAGTTGCCAGTGCCAGAGATTGATTTTCAGCCTGGAC  
AGGATGATGCAGTTGTGAGGGCAAGCTGCCCTCTGGATTCTCACCCAGTTTCTAGCA  
TCATAGAAACATTCAGAGAACATCAAATTACAGCTCAAGAGTCAATGTGTCCATG  
GAGGGTGATAAGATTGTTACACATTCTCTATCCGGACTCCAAGTGGTGTGCTGCTGAG  
CAATTGAAGGAGAACTGGAGGCTGCACTTTCTAAAATGATCTCATCTCACTGTATAT  
TTCTATTTACATCATCAGACTATCTCATGCATGTCCCAGTCTTGTCAAAAATGGGAT  
TTGTATCGATAGATGATTAGCTTCTGTAGTCAAGTTTTAAAAGAGAGCAATCCGTG  
TTCCGATCATTGCTGTATGGTCGTTTTAAAAGCTACCAAATAGACAGAACAGAATGT  
ATGTAACAATACTAGGAGAAACTCTGAAATCACTCCTCAGGAAAGCTCCAAGTGG  
GAAGTGGACACCATTATTGCAAAACAGTCTGAATCATCCACCTACGTTGTCTGTCT  
ATTTTCTTGCTTCAATGTGTTTCTCATGTGTATCTCGAGGATGTCAACGTAGTGTATT  
AGACCCTACTTTCAGAACATTGCGTG

Potri.002G058800.1 (Nin-like family)

ATGAATATCCAGCAGCAGCAGCAACCGAATCAATCAAAAACCGCCCTCCTGGGAAGC  
CATCTCCAAGCACTTCTCTCTTCCCTCTCTCCGATGCCGCTAACAATCTCGGCGTCTGT  
GTCAGTGTGCTTAAGAAAATCTGCCGTGACAATGGTCTTGATAGGTGGCCATATCGC  
AAGTACTTAGCTGGAAAGAGTATAGAGGACATTAGAAGGTATGCTGCTAGAGAAAA

AATCAAAGCCATTGCCGACCTCGCCAAGGCTGCTAACAAAAGTGGTATCCAGCAGC  
AAAACAATGAGAATTCCAAACCTCACAAATTGCAGCAACAAGGAATAAGGATGTT  
CTAGTTGGGCGGCAACATATCACGCTCACTCCAGGGTTGGCAAAGGATTGATGGG  
TTTGATGAGTTTAAATATGGATTTCCATCAGATGGTTTATCAACAGCTACGAATAA  
ATGGTGGGGTAGCAGCCTGTCTGATACTCAAAGGGCCACTGATAGAGCTGGAATTG  
AGACTGATGAAGATGACGGCCGTCAATCTGAAGAAAAGGTAGATGCTGGTACCAGT  
GTGGTATTGTAGACGAAGAGAAAGGTGAGAATGGAAAGATGGAGAGTAATGAAA  
TTGATCCACAAGGGACTGGTTTATTAACGTCTGTTAGGAAAAGAGCTGCTGAAGAA  
GGGCGAGAAGCACTTAACTTGGTGTCTACCGCACTTATGGTGTAAACAAGTTAGGC  
AGGAAACAAGAGCTTTGCTTCTTCGAATATTTGGATCTTCATTGCCAAAACAATGG  
ATTCAGGACTTCAGTTCAAATAGAGGTGGATTGTAGACATGAATAAC

Potri.002G108400.1 (bHLH family)

ATGGAAATTAATGGACATGATTTCTTAGAGGAGTTAATAGCTCTAAGTAGGGAATCT  
TGGCAACCCACTCCAAATTATCCATCAGAAATGAATGAGCTTTTCTCTGGTAGCTTT  
AACCATGGTTGCTTTGAAGAAATCCCAGCTACACTCCCACAACTTCTTTCTGTCCTG  
AAGGATTAATTTTCATCTCCTCTTAAACAAGACTTCAACA ACTACTTTAATGAAG  
TCTTCTGCCCATTTGGTGTAGATTCTCAGCACCACAGTTCACAGATGAGTTCTCTTC  
AGCCCCACAATTCACCGATTCTTCTATAACACGCTTGACACACCACCATTCTCTGTT  
CAAGACGATACTCCAATGTCCATGATGGAAGATGAGGAGCTGGGTCTGCTTGCTAAT  
GATCAACAGAATTTGCAGATGCAGGGTACTTGCAAAGTTGAGCCATTTCAGTCGCCG  
GAGGTGTCGGCTTTCAATGCTGGTATCTGTCCAGAAAGAAAGATTAGAGGCAAGAA  
GATGGAGGGGCAACCATCAAAGAACCTAATGGCCGAGAGAAGGCGAAGAAAGAGG  
TTAAATGACCGGCTTTCAATGCTAAGATCAATTGTTCTTAAATCAGCAAGATGGAC  
AGAACATCAATACTTGGAGACACAATAGATTATATGAAGGAACTATTGGAGAGAAT  
CAACAGCTTGCAACAAGAGATTGAAGTGGGTTTCAGAGGAGTTGAAGATGATTAGCA  
TTTTCAAGGACACAAAACCTAATGAAATTGTTGTGAGAAATTCACCGAAGTTTGAAG  
TGGAAGAAGAAATGAGGATACAAGGATTGATATTTGCTGTGCAACAAGCCAGGG  
TTATTGCTATCATCAGTAACAACATTAGAAACATTAGGCCTTGAGATTCAGCAGTGT  
GTGATTAGTTGTTTCAATGACTTTACAATGCAAGCTTCTTGCTCAGAGGAATTGGAG  
CAGAGAACACTAATAAGTTCTGAACACATAAAACAGGCCTTGTTTAAAAATGCAGG  
ATATGGAGGGAGATGCCTGTAGACAGTAAAGGAGTAGAAAAAGGAGGAAATTGCA  
GTGAAGTCTTTTAAAGAGACATTTTCAAATCTTTTTATTTTGAAGAGGATTTCAAGTG  
AGGGAGTTGTTAACTTCACTTTTTTAAATAAGTTGCGTCTGCTCATCAGAGCTATGC  
ATTATCTACTTCAATGTGAGATCTTTATTAATCCAATTGCTTTAATATCATGAGATTG  
TTATTTCTTTTCTCTCTTTTTGTGTGTGTGTGTGTGTGTGTGTGTGTGTGTGTGT

Potri.002G124100.1 (WOX family)

GCCATGGGAAGCATGAAGGTGCATCAGTTGGCACGTGGATTTTGGGAGCACGAACC  
CTTTCTTACGCTGGGTTTCAAGCGTTTACGCCCTCTCGCTCCCAAGCTGGCCAACACA

GATCATAGTGCTGCCTCTTTCGATCTCAAGAGCTTCATTAGACCCGACAGTGGCCCT  
AGAAATCTTGCCCTTTCTGACGAGAAGAAAGATTCCCCTCAGGGGGAGACGCACCC  
GGGAGGGACACGTTGGAACCCAACGCAAGAGCAGATAGGTATACTAGAGATGTTGT  
ATAGGGGAGGAATGAGAACTCCTAATGGGCAACAAATAGAAGATATCACTGCACAA  
CTAAGCAGATACGGCAAGATTGAAGGGAAGAATGTTTTTTACTGGTTCCAAAATCAC  
AAAGCCCGCGAGAGGCCAAAAACAGAAGAGGAACAGCCTTGGTTTAAGCCATAGTCC  
GAGAACCCCATCTCCCGTTACCATTATATCTTTGGATACTAGGGGAGAGGTGGAGGG  
AGAGGAGGATAGTCCATACAAAAGAAAGTGTAGGAGCTGGACCTTTGAGTGCTTGG  
AATTAGAGGACAGCAGGTCATGTAGAGAGAAGGGAGATAGA ACTCTCGAGCTTTTC  
CCATTGCACCCGGAAGGCAGATGAAGGG

Potri.002G124800.1 (HSF family)

ACCGCCATATCCATATTCACACTCTCTTCCTTATCCCTTACCTAGCTATCACATCCAA  
AACCGTCACTGTTTCTCTCTTACACCTCTCCTGCAAATTAGCAGGGCGCTTTTGATCTC  
CAATGCTCTCATGTTAGATAACTGTGAAGGCATATTACTCTCATTAGACTCCCACA  
AATCAGTCCCAGCTCCTTTCCTTACCAAAAACCTACCAACTGGTAGATGATCCAGCCA  
CTGACCACATAGTTTCTTGGGGTGAAGATGACACTACTTTCGTTGTTTGGAGGCCAC  
CTGAGTTTGCTCGTGATCTCCTTCCTAACTATTTCAAGCATAACA ACTTCTCTAGCTT  
TGTCAGGCAACTCAATACCTATGGGTTTAGGAAGATTGTACCTGACAGATGGGAGTT  
CGCTAATGAGTTTTTCAAGAAGGGAGAAAAACATTTACTTTGTGAAATCCATAGAAG  
AAAAACAGCTCAGCCACAAGTAGCCATTAATCAGCACCACCCACATTCTCCTTTTGG  
TGTTAACGGGCCAGTTTCTTTCCTTTCCTCAAGCAGAACCAGCATCTCTCCATCTGAT  
TCAGATGAGCAAGCCAACA ACTGGTGTGATTCACCTCCTCTCACTTCACCACCAAGA  
GGAGGAGTTGCTACCGCCACAGTTATTGGTGGTGGGGGTGGATTTAATAGTTCAGTC  
TCTGCGTTATCAGAAGATAATGAAAGACTAAGGAGAAGCAACAATATGCTAATGTC  
CGAGCTTGCGCACATGAAAAAGCTTTACAATGATATTATTTACTTTGTCCAAAATCA  
TGTC AAGCCTGTTGCTCCCAGCAATTCCTACTCTTCTTCTTTGCTTCTTTGTGGCCCAT  
CACCTTATGCTACAACA AATCATGTTACTTCTAATGGTTCTCTAGTACAGAAGCCCTT  
AAACCAGCTTCTTGGGTACTATCCTACA ACTGCTCCA ACTAACCCTAAGCAAATCCC  
TCAAGTTCATGTTTTGATCAACTCACCACA ACTACTTCACAGAGCTCTTTGACCATT  
CTTGAAGAAGCCAACAACAATGGTTGCAAGACAAAGTTGTTTGGTGTGTCATTACAA  
ACAAAGAAAAGATTGCACCCAGAGTATGGTTCAAATCCAGGAAATATGGAAACTAG  
CAAGGCTCGTTTGGTGTGGGACAAGGATGATTTAGGATTGAATCTTATGCCTCTTTC  
AAGATGTAGTATCTTCAAATCAATTCTAAAGATCTGAGCTTTTTGGGTTTAATATTT  
ATATCTTTTCTTAGATTTTATTTCTTGTGTTGATTTTCATTGTCTTCTTTGAGTCTTAAG  
ATAGTCTGAGATGATAGTAGGCTACTAGCTCGTGTTAATGAAAGAAACATGCGTGTG  
CGTGCGTGTGGTTTTTGTGACCTTGTATATAACTTTAGTGCCGGGTATTTTCTTTAC  
CCCCACAGCCATGAATGCAGGTGGGGTTTTGGTTAGAATGAAGATCAAATCAAATC  
AAGTTTAAAAATCACAAGTCCATTTCTAAAGAGATGTCCTTTC

Potri.002G138900.1 (WRKY family)

AGTACTGCTTGTGTTAGCTTGACACATGCACCAAATAAGCCAATAAGAGGAGGAGG  
AGGAGGAGGAGGAGGAGCAAAGCTTCTTGATTAGAATGGATCAAGGAGGAAGAGA  
AGTTCCAAATTACGGGCTACAAGTCTCTTTCTCTACACCACAAGCAATCCATGAGAT  
GGGTTTTGTTCAATTTGAAGAAAACCAGGTCTTGAGCTTCTTGGCCCCCTCACAATCT  
TCTCAGATATCTCAACCGCTCAATACTAATAACAACCACCAATAATTCACATGGGGTTT  
AGTCATAATGATGAGCAGGTGGGGACAATGGATCCAAAGCCTTCCAGTGACGAGAA  
CTGCACTGGTAATGCTAACAACGATGGCAACAATTCATGGTGGAGGAGCTCATCCTC  
AGAGAAAACAGGTTGAAAGTGAGGAGAAAGCTTAGAGAACCAAGGTTTTGTTTTTC  
AGACAAGGAGCGATGTGGATGTTCTTGATGATGGTTATAAGTGGAGAAAATATGGC  
CAAAAAGTTGTCAAAAACAGCCTTCATCCAAGAAGCTACTATCGTTGTACTCACAAC  
AACTGTCGAGTGAAGAAGAGGGTTGAAAGATTATCAGAGGATTGTCGAATGGTGAT  
AACAACTATGAAGGCAGACACAATCACTCTCCATGCGAGGACTCAAATTCATCAG  
AACATGAATGCTTTACCTCTTTCATAATGCTTTAGTTAAAGTATTAAGAAAGAC  
AATGTTGTAATATTAGAATCATAATGTTTAAACGTGTCATCAGCTTGTGACAATATTTG  
CTAGTACATGATTTTGAGGGGTTTTTCATCTTCCCAAGATCAACAAATTCTGACAATTC  
TTGATATTCATTTATTTGGATATCAATCTGAG

Potri.002G159400.1 (bHLH family)

ATGGCTCATGTTGTCCAAAGCCAGCAGGCAATACTAGAGAAGCTGAGGAAACAGCT  
TGCAATTGCTGTGAGGAGTGTACAGTGGAGCTACGCAATTTTCTGGTCACTGTCAAC  
CAGACAGAAAGGGGTACTGGAATGGGGTGGTGGTACTACAATGGGGACATCAAG  
ACTAGGAAAGTTCAAGCCACGGAACCTTAAAGCTGATAAAATAGGCTTACAGAGGAG  
TGAGCAATTGCGAGAACTTTACAAGTCTCTCCTTGGAGGCGATGCTGGCCAGCAGGC  
TAAGAGGTCTTCTCCTGCATTGTCTCCTGAGGATCTGTGATGAGGAGTGGTATTA  
CTTGGTGTGCATGTCCTTTGTATTCAATCCTGGTGAAGGGTTGCCAGGAAGAGCATT  
GGCCAATAAACAGACCATCTGGTTGTGCAATGCTCAATATGCAGATAGCAAAGTATT  
CTCTCGCTCTTTGCTTGCAAAGAGTGCATCTATTCAGACCGTGGTGTGTTTTCCCTAT  
CTTGAGGGAGTGATGGAGCTAGGTGTAAGTGCAGCTGGTCCAGAAAGACCCAGTCT  
CATTCAACATATCAAAGCTTCTTATTAGATTTCTCAAAGCCTGATTGCTCTGAGAA  
ATCTTCCTCTGCTGCTCATAATGGAGATGATGATGAAGACCAATGTCTACCAAGAT  
CAGCCATGAGATAGTTGATTCATTAGTTTTGGAGAACCCTGTACACCCCAACAGACGA  
TATAGAACTTGAGCAAGAGGGAATTAACGATTTACATGGAAATTTGCGTGAAGAAT  
TCAAAAGGAATTCCTGATGATTGTTTCAGATGGCTGTGAGCACAATCACCAGACTG  
AAGACTCCATGCATGAAGGTTTAAATGGAGGTGTTTCTCAAGTTCAAAGTTGGCATT  
TCATGGATGATGAATTCAGCGATGATGTTCTAGATTCTATGAATTCGAGTGAGTGCA  
TATCAGAGGCTGTAGTGAAACAAGGAAAGGCCGTA CTCTTCCAAGGAAAAAAT  
GTAACCCGCCTTCAGTCGCAAGTATTTCAAGAAGGAAACCACAAAAGTTGAGCTC  
CTTCGATCTTGGAGCTGATGATGACTTGC ACTACAGAAGAACTGTGTGTGTTATTAT  
GAAAAGTTCAAGTCAATCAATTGAAAATCCATGTTTCCGAAGTGGAGATCACAAGT  
CCAGTTTTTTTAGCTGGAAGAAAAGAGCAGTTGATGGCGTTATGCCACGGGTACAAC

AGAATATGTTGAAGAAGATTTTATTTGCAGTACCTTTGATATATGGTGGCCACTCTCT  
TAGGTTTCGACAAGGAAAATGGAGGAACAGATTGCCTCAAGAAATTGGAAGGCTGTG  
AAACGTGCAAGGAGCATTATAAATCAGATAAACAAAGAGTGAATGACAAATTTATA  
GTACTCAGGTCGATGGTTCCTTCTATTAGTGAGATTGACAAAGAATCAATCCTCAGC  
GACACCATTAACTACTTGAAACAGCTTGAATCAAGAGTAGCAGAACTAGAATCTTG  
CAAAGGCTGGATAGATCACGAGGCAGGACACAGGAGGAGTTACATGGACATGGTA  
GACCAGACATCAGATAACGACGACATCAAGAAGATTGACAATGGAAAGAGATCTTG  
GGTAAACAAGAGGAAGGCCCTTGACATTGATGAAGCTGAACTAGAGCTTGATGGGG  
TTTCTCCCAAAGATGGGATGCCCTTAGATTTGAAAGTATGCACGAAAGAGAAGGAG  
GTTCTCATTGAGATTAGATGTCCTTACAGGGAGTACATGTTGCTTGATATCATGGAT  
GAAATCAACAAACTGCAGTTGGATGTGCACTCAGTCCAGTCATCCACTCTTGATGGC  
ATTTTCGCATTGACCCTGAAATCTAAGTTTAGAGGGGCAGCAGTTGCACCAGCAGGG  
ATGATCGAACAAGCACTTTGGAAAATTGCCGGCAAGACTTGAATCGTCATATATCAA  
CTGGTACTTGGATGGCTTATCCATTCAGTACAAATTAGTTCCTAGATTCTCATGTATC  
ATGTAGCAGTAACTGCATGGCCTTGTAAGTGCATAACTTCAATTTCCCTCTTAACCTT  
CTTTCCATTATCAAATGTTCAACCTTAGTGCTTGCCTAATTAGATCAAGTAGTGACTTG  
TTAGAAGTGGTGGAGGAATCAAATCTTTCAGCGT

Potri.002G196200.1 (bZIP family)

CGCACCAAACGACCTCATTAACCTTCCTTTCTTTCGAATTAATTTGGGTCCTCCTATT  
TTAGGGTTTCTGTTCCCTCAATAATCTCTCTCTCCTCCCCTCTCTGCGTTTTCGTCAGCT  
AAGTATTCTTCTTTCAGTGTCTCTCTATTTTTGTTTTTAGATCTAGAGTCTCGGATCTA  
ATTTTTGGGTGATTTCTTACTCTCGTGTTTTCTAAAAATCCGTGCTGTTTCGATTTGGG  
GATCGAAAATTAGGGTTTTGTAAGAAGTACCAATGTTTTTAGAATTTCTATGAGTTA  
CGCTATACTCATGCGTCGAATTCGGATTCTTCACTCTTCTCGGTTGTGTTTCTCTACT  
GGTTTTATGTGTTCTCATGAATTAATCCAATTTATTTTCTAGATCTCGACCCCTAGGT  
TCTTTTTACAATCTAATTATAACCGAATTGGATAGGTAGGTATTGAATTTATTTGATC  
TTGTTAGCGAAGAATATAGAAATTGTAAAAAATGTCTGCAAGGCAAGCGGCGAGCT  
CAGGATCGGATAGTGATCCGCGATATGCGAATGTGCGATGAGAGGAAAAGGAAGAG  
GATGATATCCAACAGGGAATCTGCGAGGCGTTCCAGGATGAGGAAGCAGAAACAAA  
TGGGGGATTTGGTCAATGAAGTGAGCAAATTGCAGAACGAGAACAATCAGTTGATG  
CAGGGTATCAATGTTGGCCAACAACGCCGCATGGCGATGGAGTCAGCCAACAATGT  
CCTGAGGGCTCAGGCTGTGGAATTGACTGAGAGGCTGCGGTCGTTGAACTCTGTGTT  
GCAGATTGTGGAGGATGTTAGTGGGCTCTCTATGGAGATACCCGAAATACCCGATCC  
TTGTTGAAGCCGTGGCAGCTCCCCTGTTTCAAGTAATGCCATCATGGCATCTGCTGAT  
ATGTTTCAATATAGTGTGTTGTTGGCCTGTTCCGGTGCTTTGGTGGAAAGATGTTGTTG  
TCTATCGTCCGGGGTTCATCTTTTGTGCTGCGTGGGTCTTTATAACAGCATGGTTTAA  
GTCTTAGGTGGATGCTGGTATGGTGTGTTTGGATAGCAGTGTGGTTTTGTGCAAGTT  
GTGATGTTATGGGTCCTGTTTGAATTTCAATCACTGTTTATAATGTAATCAATTTCCA  
ATTTGTGTCATTTCCCTTACTGTTATGTTTCTCTGCAGCT

Potri.002G235400.1 (bHLH family)

GCTGTCAAGATAATTGCTTGTGTTTTCTTTCTCCTCTC**ATG**GAAAAAGACAAGTTGTTT  
ATGAGCGAGGGAGCCAGCACAGCAGCTCCCATTTGGAATTCCTGCAGTTTTGGAATG  
GAAATGCAAACCGATGAGCTGAATTGCAGTTCAGGGCAACTTGCCAATTGCTTTCTC  
AATCCCAATTGGGACAACCTTATTGGATCAGAGCGATCCCTTTGAGTCTGCTTTGAGC  
TCCATTGTCTCATCTCCAGTGGCATCCAGTGTCAATGCCAACGTTATTTCTAATGCTG  
GCGTTGGTGGTGACAGTGTTTTGATCAGAGAACTTATTGGAAGACTAGGAAACATTT  
GCAATTCCGGCGAGATGTCTCCACAATCCTACATTAACAACAATAACAACAGCACC  
AACACTTCTTGTTATAGTACCCCATTTGAATTCCTCCAAAGCTGAGTATTTCAATGA  
TGGATTCACAGATGAGAGGAAATCTGCCAATTCCTGGAAACAGCTTAGTAAACCATC  
CAAGTTTAGCACCATTTCTGCTGACCCTGGATTTGTAGAGAGGGCTGCTCGATATT  
CTTGCTTTGGAAGCAACAATCTTGGAGGCCTAAATGGACAATTCGGATTGAATGAAT  
CAGAATTGATCAATAGGATGATGCCCCGAGTAGAACCTGGTAAGCTGTCGAGAGTT  
TCGAGTAACAATTCATGAAGGTCGCTGGATCGCAAGCAAATGTTCAAGAAAGCAA  
TAAGAGCTCACCCAGGATGGGAATTTGAATTCGTATAAGAAATTCAGTCGGTTGTC  
AAGACCTTCAACACCAGAGAATGGAGATTCCAGGGAGGAATCTTCAGTGTCCGAGC  
AGATCCCGGGTGGGGAATTGAGCATGAAATCCCAGACTGATGCCAATTCAGGAAA  
AGAAAATCAATTCCCAGAGGAAAAGCCAAAGAAACTCCCTCTCCCTCTCCCTCTGCT  
TCTGATGTCAAGGTTGCAGCAGAGAATGATGAATCGAG**G**GCAAAAAAAGCAAATC  
AGAGGACACTAATGGGAGTGACAAGGATTCAGCAAAGGCCATGGAAGAAGAAAAT  
GGAAATCACAAACAGAAAAAAGACAATTCAAACCCGCCAGAGCCACCAAAGGACT  
ATATCCATGTCAGAGCCAGAAGGGGTCAGGCTACAGATAGCCACAGTCTTGCTGAA  
AGAGTTAGGAGAGAAAAAATCAGCGAAAGAATGAAGTTTCTTCAGGATCTTGTTCC  
TGGATGCAATAAGGTTACTGGGAAAGCAGTGATGCTTGATGAGATTATAAACTATGT  
GCAGTCATTACAGCGCCAGGTTGAGTTTCTGTCAATGAAGATGGCAACTGTGAACCC  
GAAGATGGAAATTAACATGGAAACTTTCTTGTTCAAGGATATTTTCCAATCCCGTGG  
ATCCATGCCACATGGTCTTTATCCATTAGATTCCTCCACGCCGGCATTCCCTTATGGT  
TACCAATCCCAGCAAGGGTTAGCCCTACAAGATGGCATGTCCAGGAATGCAGAATC  
CCAGTTCTCTATGAACCCATTAATGCTGCATTGCGGCGAAGCTCGAGTATGCAGTT  
GCCTGCCCTTGATGGCTTTGGTGATGCTTCTCATCAGGCCTCAGCAATGTGGCAAGA  
TGATCTTCAAAGTGTTGTGCAGATGGGATATGGTCAGAATCAGCAGCAGGACTTTCA  
AGGCTCAGTGCCACCAACTCAGATGAAAATTGAGCTA**TG**ATTTAACCAATAAACAG  
TCATTGATTCCACTGAGGCCCCCC**C**TCCCCAGAGAGAGAGGCCTGCCTCAGAATG  
TACAGCCAGGTTCCAGTTTGCATCATCACTCTTTAGCAAGGAGAAAGACAACCTACT  
CATCATCTATATATT

Potri.002G248500.1 (bHLH family)

**ATG**GAGAGTGAGTACTTTTTCAATGCAGGAGTCCCTCCACAAGCATTGCTCTTTGAA  
CCAACCTCAACCTCTTCATCGATGCCA**A**TTTGGCAATCCCTCTCATCTCCCATGGAA  
ATGCAAGATAATTGCTCAGCCC GCCGCTTGTTCAATCCAACCTGGGAAAAGTCAACG  
GATCACAGTCCTCACTTTGAGTCTTCCCTGAGCTCAATGGTGTCTCTCCAGGAGTAT



CAAACGTGTAACGTGTCCAGTGAGAGCTTTATGGTCAGAGAACTGATAGGAAATCTA  
GGAAACATTGACAACAGCAACAACCCTGGTGAGATCTCACCGCATTCTCAGCCAAT  
GTTGGCAGCTTCAATATATTACAGCTGCCAATAACAGTGCCAACACCTCATGCTATAC  
TACTCCTTTGAATTCACCACCCAAGCTGAATATGCCTGTCATGGATCAATTTTCGAA  
AGAGCATTGGAATATCCCCAGTTTGGGAAAACCAATGGGTTTGAATTCCAGTGTGGC  
AGAATTCACAGCTGATCCGGGATTTGCCGAGAGAGCTGCAAAGTTCTCTTGCTTTGG  
CAGCAGGAGTTTCAATGGCAGAATCAGCCAGTTGGGGCTAAACAATGCTGAAATGG  
CTAATGGATGTAATCCATTGATGGGAAATGGCAAGTTGGCGCGTGTGCGAGTAGTC  
CTGACTCAAGGCAGTGGGATCTCAAAGGGTAACAAGAGTACTCCATTGCAGGAT  
CGATCCGAATTGACAAATTCTCAGGAGTCCTCTGTATCTGAACAAATTCCAAGTGGG  
GAGGCAGGTGTAAAGGCCTCCAATGAGTTAAATTCCAGGAAAAGAAAAGCACTTTC  
CAAGGGAAAAGCAAAAACAATCAGCATCAAACCCACCAGCCAGTGCTACGAAGGAT  
GCAGAACTGATGATAATTCAAACACGAAAAGAATCAAGCCAAATGAAGGAGAAG  
AGAATGAAAATAGTCCTGTAAAGCAGAGGAAGAGCCAAAGGGCAGCGGAGATGA  
TATCCAAAACAAGGCCAATTCAAGGCCTCCTGAGCCTCCTAAGGACTACATTCATGT  
TAGAGCAAGGAGGGGTCAAGCAACTGATAGCCATAGCCTTGCTGAAAGAGTTCGAA  
GAGAGAAAATCAGTGAACGAATGAAGCTTCTCCAAGATCTTGTGCCTGGTTGCAAT  
AAGGTCACAGGAAAAGCCCTTATGCTTGATGAAATCATAAATTACGTGCAGTCATTG  
CAACGGCAAGTTGAGTTCCTCTCTATGAAGTTGGCTTCTGTGAATACCAGGCTGGAT  
TTTAACATGGACTCTCATTTCAAAAGATATTTTCCAATCAAGCCAACCATTGCC  
CATCCAATATTTCCATTAGATTCCCTCGGCACCGGCAGCAATATTTAGCCACCAACAG  
CAGCAAAATCCACCACTGCATAGCAATATTTCTAATGGGGCAGTGACCCACTGCTCT  
GTGGACCCATTAGATACCACTGGACTGTGCCAAACCCTCAATGCTCAGTTACCCCCG  
CTTGATGGATTTACCCAAAATGCTCATCAGTATCCAACATTCTGTGAAGATGACCTG  
CAGACCATTGTTTCAAGTGGGTTATGGCCAGAATCCAAACCTGGAAACATTTCTGCCA  
CAAAATTTCCATGGTTCAAATCAAGTATCCACATGAAAATCGAGCTCTAAATCACCA  
TTCTTCAGTCCAAAATTAAGAAGGAGAGAAAGGGCGCTGTACATACAAGAAATCTT  
ATATGGACCAACCCAGGAATCACTAAGCAATTTTATCATTAGGTTGATGAGGAAGA  
ATTTTTTTTTTTTCCCCATGATTTTACATATTCCTGATTTTTTTTCCCCCTCAAGATCCT  
TTTTTTCAAGTTTCTTGGAAGTATCCACTGTAAAATCCTAGCCTAGCTCTTATGTAT

Potri.003G048700.1 (Whirly family)

CTCACTCTCTGCATCAAAGATGAAACTATCGAGATTTCTGAACTTCAACAGGAA  
TGCAGTTGGGAAACCTACTGATGTTAGAGATGGTTCAGCATTGCATGCTTTAACTTT  
CCAGGCTAGCATTCTACTGGTGGGAAGAGTTCTATTCAAGATCGTGTATTTGCTCCT  
TATTCTGTTTTCAAGGGTAAAGCTGCGCTCTCTGTTGAACCTGTTCTTCCAACCTTCT  
CTAAGTTTGGTTCTGGGAATCTTAGAGTTGACCGACGTGGTTCTATGATGTTAACTTT  
CTTGCCTGCTATAGGTGAGCGTAAGTATGACTATGAAAAGAGACAGAAGTTTGCTCT  
ATCAGCAACAGAAGTGGGATCTTTGATAAGCACGGGTCCCAAAGATTCTTGTGAATT  
CTCCATGATCCCTCAATGTTGTCAAGCAATGCTGGCCAAGTGAGAAAGAACTTATC  
AATTAAGCCACACGCAGATGGTAGTGGCTATTTTCGTTTCATTAAGTGTGTCACAA

CATCCTGAAAACCTACCGAACGATTTACTGTTCCCTGTCACGACTGCTGAATTTACAGT  
TCTGAAGACAGCTTGCAGTTTTGCATTGCCCCACATCATGGGTTGGGATCGGTTGAC  
TACTCCACTGCCTGGAACCTTAGCATCAAAGCTGTCAAAGTGGATCCACAAATGCC  
TGATTTAGAATGGGATAAA**TGA**

Potri.003G051600.4 (bHLH family)

**ATG**GCAGGAAACCCTAGCTGGTGGAGCATGCATCCACCTTCACAGCAACCTTCTGCT  
TTGTTATCATCTTCTCCATCTAGCTACCCTTCCCAATATGTACTTGGATCTTCTCCATT  
CCCTTTGAATTCTCTGCCTGATAACCAAGAGCTTCCACAGTCATGGAGCCAACACTACT  
TTTGGGTGGTTCGTCAGGAGATGAAGATAGGTACGGTCTGAGTCAATTTACAGCCTAA  
AAAGTTGGAAAATTGGGAAGACCAAATCTTAAATCCGTCTCCAAGTATTTCTTTAGA  
TGCTGATGTAAAGCAAGAGGTTTCCCAACAATAGCAACTTATATGGTCATGGGGAAG  
AAGACTTTCAGGCAGCTAGGCCACAGCTTGGCCACAAGCGATGCCGGTCTCTTCCC  
CTAGGTCTTGCCTCACAAAGTTAAGTAGTAGTACTAGTATATTAGACTTCTCTTACAA  
CAAGGCAGATGGGGCAAGTCAGCATCCAGATCAGTCATCTGAGTGTAACAGTACAG  
CCACAGGTGGAGTGTGTAAGAAGGCTAGGGTTCAGCCCTCTTCAAGCCAACCTCTTA  
AGGTGAGGAAGGAGAAGTTAGGTGATAGAATAACAGCTCTTCACCAAATGGTTTCC  
CCTTTTGGAAAGACTGACACAGCTTCAGTCTTGTTAGAAGCTATTGGGTATATCAGA  
TTCCTTCAGGGTCAAATTGAGGCTCTTAGCTCCCCTTACATGGGCACTGCCTCGCCA  
AATATGAGGAACCAGCAACAATCTGTTCAAGAAGAAAGAAATAGTGCATTTTCTGA  
AGACATGCGTCAGGATAATCAAGACCAGCCAAAGGACTTGAGGAGTAGAGGACTGT  
GCTTGGTTCCCGTGTCTGTACTCAGCATGTTGGAAGTGACAATGGTGCCGATTACT  
GGGCTCCCGCTATCGGAGGAGGGTTT**TGA**CCGATGTAATATGATTCGAAGGCCGTTT  
CAAAGTTTC

Potri.003G081200.1 (ERF family)

**ATG**TACGGGCAGAGCTTACTTGATCAGCCCGATTATGCCTTTCTTGATCCCGTTCGCT  
TGCATTTGCAAGGCGAAACTGTTTCTACTGCTCCCACCACTACTTGCAGCTACACTC  
CAGCAATTACAACGACGACGGCTGCTCCAGCTGCTAATTATACTCCACCCCTTGTTT  
ATTGCAGGAGCACAAAGCTTCAGCAGCTTGTATCCTTGCTTAACAGAAAACCTGGGGA  
GACTTGCCACTCAAGGTCGACGATTCCGAGGATATGTTCCCTTATGCTGTCCTCCGC  
GACGCCGTCACCGTTGGGTGGGTCCCATCACTCAAACCGATCAACTGGTGCAGCCC  
AATTTCCCCTAGTGAAATTGGAACCCACAGAGAATCTGGCTGTCTCGCCGCCCTCC  
ACGGCGGTTCCAGTGGCTGAGCCTGCGGTGCTTCCGTCCAAGGGGAAGCATTACCG  
GGGTGTGAGGCAGCGGCCTTGGGGGAAGTTCGCAGCGGAGATTAGGGACCCAGCGA  
AGAACGGGGCCCGGGTTTGGCTGGGGACGTTTCGAGACGGCGGAGGATGCGGCGTTG  
GCTTACGACCGTGCTGCCTATAGAATGCGTGGGTTCGAGGGCGTTGTTGAATTTCCCG  
TTGAGGGTGAATTCGGTGAGCCTGATCCGGTTAGAGTGACTTCGAAGAGGTCTTCT  
CCGGAGCCATCATCGTCCGTGGACAGCGGGTCACCGAAGAGGAGGAAGAAGGTTGG

TGGCACGGCGGGTGCTGCTACAGTGGTGGCTAAAGCTGGGTTGGAAATTGGGAATG  
GGGTTGGATGTCAAGTGGGTACCCATGGCGAGCAAATGTTGGTTATC**TAG**

Potri.003G087700.1 (ARR-B family)

CCTGTTTCCATTTAAAGAATTCCCAATTTTGGTTTGAAAGTTTGTTCCTTTTCCTCTTC  
TTTTTTTTCCTGTCTATGCTTTGGATTTTCTTGTCTTTTTTCGGTGTATATTGCAGAGAT  
CTTACATAGGTCTTTTAGTTTTTGTGTTGTCTTATAAACTGGCACAAGCAAATAAAG  
ATCTTGAACCTTTGAGCAAGATCTTTCTCTTCTTACAGGTTTGATTTTGATGCTGATAA  
GAAGTGATACCGGAAACTTGTCTGCGGCTTGAGAAACGATGCCAAGCAAGCT**ATG**G  
TTTGTACCACTAATGATTTATCAGCATGGAAGGATTTTCCAAAGGGCCTCAGTGTCC  
TTCTCCTTGATGAGGACAACAGTTCTGCTGCTGAGATAAAATCGAAACTGGAAGCAC  
TGGACTATATCGTTTATACATTCTGCAATGAGAATGAAGCGCTCTTAGCAATTTCAA  
ATGAACCTGGAAGCTTCCATGTTGCTATAGTGGAGGTGAGTACGAGCAATAGCAAT  
GGGAGTTTCAAGTTTCTAGAACTGCAAAGGACTTGCCTACCATTATGACTTCAAAC  
ATTCATTGCCTGAACACCATGATGAAGTGCATAGCGCTTGGTGCAGTTGAGTTCCTT  
CGGAAACCACTCTCTGAAGATAAACTAAGGAATATATGGCAGCATGTGGTTCATAA  
GGCATTTAATGCAGGTGGGAGTGTTCATCCGAATCACTAAAGCCTGTCAAAGATTC  
TATAGTTTCTATGCTTGAGCTCAAAGTGGAACTTGAAGAAAACGAGGATGAGAACA  
TGGAGAAAACAGAAAATGCGTCTTTGGCTCAGGAAAGCAATGAGCAGCAGTCACCA  
GCTAGTGATAAGCATCCAGCTCCTTCAACTTGGCAATTTAAACAAGTAGGGCGGCTG  
CTGGATGATGGAGATTGCCAAGACCATATTAAGTCTCAGTAGAAAAGGATAGTGG  
GGAGCAAGAGGGGGAATCTAAATCTGTTCGAAACAACCTTGTGCCATGTCTCAAGAAA  
CTCTAAAAGCAGGGCATCCTCCATGCTTTATAGAGACTGTGATCAAAGAGACAGGT  
GACTTAACTGATGGTGCCAAGAGTGAGAATAACATACATCCCAATCCACAAAATAA  
AGACAGTCTCAACCATTCTAATGATGTTGCTTCTGATCTTCATACTTCCAATGGGACT  
AGAGCTAATCGAAAGAAGATGAAGGTAGACTGGACACCAGAGCTTCACAAAAAATT  
TGTGCAAGTGGTGGAAAACTAGGTGTAGATCAAGCAATTCCTTCACGAGTATTAG  
AGCTAATGAAAGTGGAAAGCTTGACTAGGCATAATGTAGCAAGTCATCTGCAGAAA  
TATCGAATGCGCAGGAGGCCTATTTTGCCCAAGGAAGATGACCGGCGATGGCCACA  
CCATAGAGAGCAAGTACAAAGGAG**C**TATTATCCATATAAACCTATCATGGCATAACC  
CTCCATATCATTCTAACCATGATCTTCCAACCAACCCGGTCTATCCTATGTGGGGAG  
CAACAGGTAGTCACACAGCTAGCATGCATACGTGGGGCACACCAGCTATCTCCA  
TGGCCCCAACAGAAATTTGGCACAGGAAGCCTTATCTAGGGATGCATGCGGATGC  
ATGGGGTTGCCCTGTGATGCCACCATTGCATAGTCTTTTTTCTTCTTTTCCTCAAAT  
GCATCTGGGTTTCAAAGTGCCAGCATGGTCGATAACAGCTGTGGCATGCCACAAAA  
ACCTTTTGACCTACAACCGGCCGAGGAGGTGATCAACAAGGTAGTGAAAGAGGTA  
TCAACAA**A**CCTTGGCTACCGTTGCCCATAGGCCTCAAGCCCCCTTCTACAGATAGCG  
TCCTAGCGGAGCTCTCCAGGCAAGGCATCTCATCAATTCCTCCCCTTTGCTCTAATTC  
CTTC**TAA**TGTGGTGCCATTTAATCAGATTATGGTAGCTAACTCTAGTTCAGCTGGTCC  
TTCATCAGTCGTCATCAAAGATTAGACT

Potri.003G155700.1 (MYB family)

CTAAATGGTGAGCTGTGATGATATGCAGGAGGGTTTGGGAAATAAGACGGGCCACC  
AATGCTGCAGCAAACGGAAGGTCAAGAGAGGGTTATGGTCTCCAGATGAAGACGAG  
AAGCTAATAAAATATATAACCACCCATGGCCATGGTTCTTGGAGTTCTGTTCCAAAG  
CTAGCAGGGCTGCAAAGGTGTGGAAAGAGTTGTAGATTGAGATGGATAAACTACTT  
GAGACCAGATCTCAAAGAGGGTTCGTTTACTGCACAAGAAGAAAGTATCATCGTTG  
AGATTCACAGAATGCTAGGCAATAGATGGGCTCAAATAGCTAAGCATTTCCTGGT  
AGAACTGACAATGAGGTCAAGAACTTCTGGAACTCGTGCATCAAAAAGAAGCTCAT  
TGCACAAGGGTTAGATCCAAAACTCATAATCTCCTCTCTAACAATTACAAACATAA  
CAATAACAATAATGCATGCGAACTGATCTCTTATCAATATCCCATCAACAAACCAC  
CTCAACTTTCACAGTAGATTCACAAATCAATGATACTTCAATGGATATGAAAGCACC  
CCTCATTCCATTCCCTACGATTCCCCAGTTCCTGATACCAATCCATATCCCCCCTTG  
TTGCACAAATTCTCTTCCATATCAACATGTGAATACCAAAACCCTAATACTAGCT  
TTCTTGGAGTCTGGAAGCAAGTCTTCAATCGGAAGTGTCCCTGTATCCTCTTCTACTT  
CACATCCATCTGAGTTTGGCATGCTAGATGAGACCTGCATGTGGGCTGGTGGCTATG  
AACTCATTCAATCCATAAAATCTGAAAAAGAGCAGCCAGAACAGCAAGTGGAATTA  
ACGATTGAGAAGACCAATGAGTTAATAGGTGCTGGGCAGAATATGGTTGCTTCATTT  
GAAACTTCCACCTTCGATTTTGATTTTGTGGAGTCTACTCTATTGCCTTGTGGGATGT  
ACTATAACCCTAGTCCCATAGTTCAACCTGCATGGAATTCATGGGCCTTGCAAGAGA  
AAAAGTGAATTGGTGCGGCGATGAGAGATTTCACTCTG

Potri.004G050200.1 (ARF family)

GAGTCTTGACTCCAATCTCCTTTTAAGTCATTACCAAAGTTGCACTATAATGCAGCC  
ATGAAACCTCTCCTTATTCACAAAAGCACTTGTCTTTTGATAAATCTTCATTATTGTT  
ATCAACAACCTCTCCTTATTATTATTAGTCTTCAAGAACTCTACACTATTCTTGTCTT  
GTTGTCGTTGTTTTTGGCTTAGGTAGGCTACATAGCTAAGGCAAAAATGGTGGGTAT  
GATAGATCTTAACACAACCTGAAGAAGACGAAACAACACCATCTTCTGGGTCTTTATC  
TTCTCCATCATCGTCCTCTGCTGCTTCTGCTTTAAGTGCTTCTGGTTCTGGGTCTGGTA  
CTTCTCCTGTTTGGTGGAGCTTTGGCATGCTTGTGCTGGCCACTAATATCTTTACC  
AAAGAGAGGAAGTATTGTTGTGTATGTCCCTCAAGGTCACCTAGAGCAACTCCCTGA  
TTTGCCTCTTGGGATTTATGATCTCCCTCCTCATGTCTTCTGTAGGGTTGTTGATGTCA  
AGCTCCATGCAGAGGCAGCAAGTGATGATGTTTATGCACAGGTTTCTCTGGTTCCTG  
AGAGTGAGGAAATTGAGCAGAAGTTGAGGGAGGGGGTATTTGAGGGAGACGGTGA  
AGAGGAGGATGTTGAAGCCACAGTGAAGACAACAACACCGCATATGTTCTGCAAGA  
CACTAACTGCTTCTGATACCAGCACTCATGGAGGCTTCTCAGTCCCTCGTCGAGCTG  
CCGAGGACTGCTTCCCTCCTCTGGATTATACTCAACAAAGGCCTTCGCAAGAGCTTG  
TAGCAAAGGATCTGCATGGCTCTGAGTGGAAGTTTCGACATATCTACAGGGGTCAAC  
CTCGGAGGCATTTGCTCACTACTGGATGGAGTGCGTTTGTCAATAAGAAAAAACTTG  
TCTCTGGGGATGCTGTGCTCTTCTCAGGGGTGAGGATGGAGAATTGAGACTGGGAG  
TTCGAAGAGCAGCACAAGTTAAATGTGGTCCACTTTTCCGGCTCTTTGGAATCAGC  
AGTTGAATCAGAGCTCTCTTGC GGATGTAGCTAATGCTATTTCTATGAGAAGTGCTT

TCCGCATTTACTACAATCCAAGGGCCAGCTCATCAGAGTTCATTATACCTTTCAATA  
AGTTCTTGAAGAGCCTTGACCAATCCTTTTCTGCTGGAATGAGGGTCAAATGCGTT  
TTGAAACTGAAGATGCAGCAGAAAGAAGATATACTGGACTAATAACTGGAATCAGT  
GAGCTAGATCCTACTAGATGGCCTGGTTCAAAATGGAAATGTCTATTGGTAAGGTGG  
GATGATACGGAGGCTAACAGACACAGCAGGGTTTCTCCTTGGGAAGTTGAGCCTTCT  
GGTTCTGTTTCTGGTTCTGGTTCTAGTTCCAATAACTCTATGGCACC  
TGGTTTGAAGAGAAGCAGGTCTGGATTGCCTTCATTGAAGGCAGAATTTCCAATCCC  
TGATGGGATCGGAGCATCAGACTTTAGGGTATCTTCAAGGTTCCAGGAGGTCTTGCA  
AGGTCAAGAAATTATGAGTTTTAATACTCTTTATGATGATGTTGATGGTCAAATCA  
GCACCCATCTGAAATAAGGAGTCGGTTTCCTGGTTCACATGGATCTGGGATTGCTGC  
AATAGGAAGTGGTATCAGAGGCTCAATCCCACCTCTGAAAATTCCTTTAAAGGCAT  
AGGCTTTAATGAATCTTATAGATTCCATAAGGTCTTGCAAGGTCAAGAAATATTCC  
TCGCTACCATATAGAAGAATTCCAAATGCTAACAAGGCTCGTGAAAATTGTGGTCT  
TGGACTCTCTGATGGTGTTCAAAGGTCAAGCTCAAGAAATGGATGGTCTACCATGAT  
GCAGGGCTATAAATACTCAAATGCGACCTCCTACACAAGTATCATCACCATCATCAGT  
GTTGATGTTTCAGCATGCTAGCAATCAAGTTTCAAACCCAACCTCCATTTTAAATTCC  
AATGATCACGAGGAGCAGACAATAACTCAAAGTTGGTTTTATCCTGAAACACA  
TGGGGGGAAATTCAAGCTGTCCTCACATTCTGACCCTGGTCTAAGAGGAGACAGCC  
AATGCAGCACGAATCCTTATGTTCTTTCCCACGAGCATCTTCAGCATGGCATTTCAC  
AACCTGTTGTAGCTCAATCAGCCTTTAGGAGCAGTCAAGATATGGTGTGTGCAAAA  
GCAGCTGCAGACTATTTGGTTTCTCATTGACTGAGGATAGACATGTTGTCAACAAGG  
AAGACAATATTGCTTCAATAACATCTCCATTGAATCCTGAATCCTCTTTTCTGCCTCG  
TGTTGGAGAACAGCTCCATCCAAAGCCTCCAGCAATAAACAATGCAGTTGGGAGCA  
GTTGTACCAAATGGGTGCCTTTTTGCTACAGTTGCCTATGCTATTTGCTCTGTAGAG  
CTTTGTGCACGAGTATAAAACCTCTGTGACTGCAAGCCTTGCCACTCAAATGGCAA  
CTTCAGTATGATTGGTGCAAAAAGTTAAGGGTGGCATCGTGTGCTTTTAG

Sequence with Blue underline represents the premature termination codon.

Potri.004G071600.4 (GRAS family)

CAGCTAATTCCAGGAATGGACCCCTCTTGTCATAAAATTGATGGATTGTGCTAAGGCA  
ATTGCAGATGGTGACCTGAAATTTGCAGATCAGCTTTTTAGCGATATGGAAGCCCTG  
TCAGCTGCGGAAACCAACCGAGTGACGAAAAAAGTCGTGAGTATTTTGCTGAAGC  
TCTAGCCCGGAGAGTCCATGGAGTGCATCCTCGAAATCCTGTCCCATTACTTCCTTC  
CTCAAATTTAAAGAAGATCAGCTATGAACCTTCTCCTCTTGAATGGTTTGCTTGTATG  
TCCACCGACTATGCCATTCGTGATGTCTTAAACGTTAAAAAAAATAAGCTCCACCTT  
ATTGAGATTTCCAGCTTGGTAGACTTCTGGCAGCGGCGTAGTTTGGAGGAATTCCTC  
TTACACGGGCACCATGGCATGCCCTTGTCATTCCAGTACACCAGTAGTAGACCAAAA  
CTGTCAAAAATGATGATTATCTTCAAGAAAACCGACGGATGATCACTGAAGTAGT  
CCAGAGGTTTCCGGTTGATTTCAAGTATAGAGCATTGTTTGTGCTGATAGTGTACCTGA  
TATAGTAGAGTCTGTGTTGAGACTTGAAAGAACAAGCGAGGATGAAATAATAATTG  
TGAGATGGGTGTTTCAACTGCACAAATTGCTTGCACCTTGAAGGAGCAGTTGATAAAG

TGTTGTCAAAACTGAAAGACCTAAAGCCAGATATCATGGTAATTGTTGAACAGGAA  
GCTGACAATAACACTGACGATTTCTTTTACCGCTTTGCCTCATCATTCAAATACTACC  
TCAGCCTTTTTGAATCTCTAGAGCTCTATGCAACCAACTTAAGTTCCTGATTTGGGA  
AAGACATTTGAGGTGGCAGATATGCAATGTGGTTGCAAGTGAAGGCATTGAACGGA  
TTGAACGGCATGAGACATTGGCTCGCTGGCAACAACGACTGTATGGTGCTAGGTTCT  
GTTCAGTTTCCTTATGTTCCAACCAGTTTGCTGATTTTTTATATGATTTTCCAGCTTAT  
AAAATAGAAGAAAATAGCGGATTTCTGTGCTGTTGGCAGCAGGTCACCCACTAAT  
CTTCGCGTCAGTTTGGAACCTGCTAATGCAGCTCATTTCAGTGGTAAAATATTGG  
CAATACAGATGACACAATGAGAGGGACTGACCTTAATCATCCTATCACAAATAAAG  
AAGAAAGTACATCTCCAGTAGTTGAGCCAGAGGCAGTAAGCTCTTCAGAGTTCGCT  
GAGCCAGAGGTAGTAAGCTCTTCAGAGTCTGATGACGACAATGAGTATGTTTATAAT  
AGAATAAGGGGATTGACGCACGGAAAGATATGGTCTGTAGAGGAGGTACGAGAAT  
ATTTGGTTTCTCCTTTTACAGAGAAGGAATCAAAAAGACTCAGCAGGTGGAAGTCTC  
GTCAACTTACCAGGAATGTTGCTGGACGGGATAAGCAATTGAATGTTCCCGATACAT  
CACTAGCAAGTCTGCTTAGGATTCCTCCATCAAGCACCCCAATACGCGAGGAGAAA  
CAATATTATGTTGATGATTCGGTTATAAATGCATTTTTTCGACTTGCTGAAGAAGAGA  
CAGGAGAAGTTTCCAGACTGGTACAGGAGGAACCTCCTCATTGCCAACTTGGACAAT  
GACCTTCCTGCTTTCTGGAAAATGGACCATGACAAAACACTACTATCTTGCATAAACAT  
TGAAGAGATAGCAGGCACATCAAAGTTGTTTCATACCGTTGTGCTTGGAAAATCATTG  
GATCCTCATTGTGTTGACATGGAGAAACGGGGATTGCTGTGGTTAGATTCATAAA  
TTCTCCTCCTGATGCTCATCATACGGAAAAGGCTACAATTTTCAGAGTGGCTTGTA  
GCACCTACTACCAGTGTGGGTTATCGTAATTCACAGCAATGGAAATTTCTGCAACT  
CAAGGATATTCCATACCAAACAAATCGAATAGATTGTGGCATATTTGTGATGAAGTA  
TGCTGATTGTCTTGCACATTGCGATCACTCCCTTTTACACAACAAGACATGCCTCAC  
TTTCGGCTTCGAGTCTTTCTTGACATATATCGTGGGAGACTACCTGTGCCACCCAGCC  
ATGTTAGATTCTTAAGAGCCTTGTATAACATA TAG GATTCTCTGTTGATGGATGATCC  
TTCCACTTGTTATGTGGAGAGAAATGCAGGAAGCTGTATTATAACTAAGGTACTAAC  
GCAGGGCCTTTTTGCCATTGTTCCACTTGTGTGATAGAAGGTTGAGGGAGTGGGG

Potri.004G078800.1 (GRAS family)

ATGCGTTTCTCTCTGTGATCCTCCAAGAAAACAAGAAAGGGGTTCTTGGAAAACTC  
AAATTCTC ATG GCCTCTGGGTTTTTCAGGCGGTGGCGGTGGCGGTGGCGTCC  
AAGATTTCTACACCAATAGATCACCTATTATACCCACCATGAACCTAACAAATAACC  
ACCACAACCCATCATCACTGCCTCCTTATAGAACCAACCAAATTTTTCTTGACCAA  
ATTTGTCTTCTCATAATTACCAACAGATCGCTCAACATAGAGCAATCTTTCCACAA  
CCACCGCTACCACCACCTTGATCGGCAAGCGAACACTTGCCGATTTTCAAGCATTT  
ACAATCACCACCGCAACAAAACCTG T TAAACCAAGCAGCACTGAACAATCTTCTT  
CTCCGGTCTGTAAAGCCGAGGATTAATAACAATATTTTCCAACAGAACACGTCTCCG  
ATTTCCACCCTTGATTTCTCTGTTAGCAACCTGTCTCCTGAGCTCCCTTCTTAATGTC  
TCAACGTTACGGGCTCCCTCTTCTTCAACAGCTTCGACCCCAACACCACCAACAACA  
TCAGCAGCAGCAGCCCATGAATCTAATTAGTCCTATTGGTATCATCAACAACAACAG

AAGCAGCAACAACAGCATGATGCCGTATGTGAATATGTTACAGAATCAAAAACGGAG  
GAGGAAATGGAATAGTTATGGGCCAAGATCGGGAGAAAAAGATGCTGAACCAGCTT  
CAAGAACTGGAAAAACAGCTTCTTGACGACGACGACGATAACCAAGAAGGTGATGC  
CGTCAGTGTTATAACGAACACTAACAGTGAATGGTCTGAAACAATACATAATCTCAT  
CACTTCTTCTTCTTGTAAATAATCCGATTTCTCCATCACCCACTTCATCATCTTCATCCT  
CATTTTCAACGGTCACAACCTCCGGTTTCGAAACAGACAGTAATCGAAGCAGCATCAG  
CAATTTACGAAGGTAAAACCTGATGTTTACACTGAGATCTTGACTCGTGTGTCTCTGG  
TTTCGAGCCCAGGAGGGAATTCTGAGCAGAGATTGATTGAGTACATGTTGATGGCTT  
TAAAATCCCGGCTTAATTCTTCTGAAAACACAACCTTCTGTAATGGAGCTGTATAGCA  
AGGAACATGTGGATGCAACCCAGTTGTTATACGACCTGTCTCCTTGTTTCAAACCTTG  
GTTTCATGGCTGCCAATCTTGCCATCATTGACGCTACAAGAGAGCAAGAACAAGAG  
GCCAACACTTCCAGCAATGGCTTCCATGTTGTTGATTTTGATATTGGTCATGGAGGG  
CAATACAAGAACCTTCTACACGCGCTTTCTGGGCTTCAGAATTCGAAGCCAGCCATT  
GTTAAGATCACAGCCGTTGCTGCTGATAGCAATGGCGTAGAGGAGGAGAGGCTGAG  
GCTAGTTGGTGAAACGCTTACCCAACCTCGCTCGTCGAGTTGGTCTGAATTTGTGTTTC  
AACGTTGTGAGCTGCAAACCTCAGTGAGTTGACTCGGGAGTCCCTCGGGTGGCAGCC  
GGACGAGGCATTGGCTGTCAATTTTGCCTTCAAGCTGTATAGAATGCCGGACGAGA  
GCGTGTCTTCCACCGAGAATCCCAGGGATGAGCTTTTGAGGCGCGTGAAGGGGCTG  
GCGCCGCGCGTGGTACTGTAGTGGAGCAAGAAATGAATACCAACACGGCCCCATT  
CATGGCGCGCGTGAACGAATCCTGTTTCATATTACGGAGCGCTATTGACTCGATTGA  
GTCAACGGTTAAAGGGGATAACTCGGAGCGAGCCAAGGTCGAGGAGGGACTGGGG  
CGGAGGATGGTAAACTCGGTTGCTTGTGAAGGGAGGGACCGTGTGAAAGATGCGA  
GGTGTGTTGGAAAATGGCGGGCCCGGATGGGCATGGCAGGGTTCGAGTTGAAGCCTC  
TGAGTCACAACATAGCCGAGTCGATGAAAACGAGATTGAGTTTAGCAAACAGAGTT  
AACCCAGGATTTAGTGTTAAAGAAGAGAATGGTGGGGTATGTTTCGGTTGGATGGG  
AAAAACTCTCACAGTCGCATCTGCTTGGCGTTAA

Potri.004G158200.1 (bZIP family)

TGCCGTTCTTGTGTTAAAAGTTGCAAACCTGTTTTGTGGGTCTCTCATGGCTTCTCTA  
GTGGAACATCTTCGGGATCATCTTTGATTCAAAAACCTCAGGTTTCGGAGGAGGATTTGC  
AGGCATTGATGGATCAGAGGAAGAGAAAGAGAATGATATCAAATCGCGAATCGGC  
GAGGAGGTCTAGAATGAGAAAACAGAAGCATTGGATGATCTAATGGCTCAAGTGT  
CTCAATTGAGGAAGGAGAATCACCCAGATTATTACAGGCATCAATATCACAACCTCAG  
CGTTACTTGAGTGTGAGGCTGATAACTCAATCCTAAGAGTTCAAATAAGCGAGCTC  
AGCAATAGATTGGAGTCTTTGAATGAGATAATCGGTTCTTGAATTCAAACAATGGT  
GTTTTTGGAGACTCGATCACCTTCAATGAACCAGCAGCTGACAGCTTCTTGAACCCA  
TGGAACATGGCCTACCTGAATCAGCCTATAATGGCGTCTGCAGAGATGTTTCATTAC  
TGAATCTGTTCTCGAGCAGAAGAGAGATAGAGAGATCTGTTTAGTAATAATCAAGCTT  
AAGAAATTACTCAAGAGCTGATTATAATTTAAGTAGTTTGAATAAAGGCAACAT  
ATGTAGAAGTCACGGGGTGG

Potri.004G174400.1 (MYB family)

CATTGAGGTTACCATTCTACTTGTAAATCCTACTGAAATGGGAAGGTCTCCTTGCT  
GTGAAAAAGCTCATACAAACAAAGGCGCATGGACTAAGGAAGAAGATGATCGCCTT  
ATTGCTTACATTAGAACCCACGGTGAAGGTTGCTGGCGTTCACTTCCTAAAGCTGCT  
GGCCTTCTAAGATGCGGCAAGAGCTGCAGACTTCGTTGGATCAACTATTTAAGACCT  
GACCTTAAACGTGGCAATTTTACTGAAGAAGAAGATGAGCTCATTATCAAACCTCCAT  
AGTCTCCTCGGCAACAAATGGTCACTTATAGCCGGAAGGTTACCAGGGAGAACAGA  
TAATGAGATAAAGAATTATTGGAACACACATATAAGAAGGAAGCTCTTGAATAGAG  
GCATAGATCCTGCGACTCATAGGCCACTCAATGAACCAGCCCAAGAAGCTTCAACA  
ACAATATCTTTCAGCACTACTACCTCAGTTAAAGAAGAGTCGTTGAGTTCTGTAAA  
GAGGAAAGTAATAAGGAGAAGATAATTAGCGCAGCTGCTTTTATATGCAAAGAAGA  
GAAAACCCAGTTCAAGAAAGGTGTCCAGACTTGAATCTTGAACCTAGAATTAGCCT  
TCCTTGCCAAAACCAGCCTGATCGTCACCAGGCATTCAAACCTGGAGGAAGTACAA  
GTCTTTGTTTTGCTTGCAGCTTGGGGCTACAAAACAGCAAGGACTGCAGTTGCAGTG  
TCATTGTGGGTACTATTGGAAGCAGCAGTAGTGCTGGCTCCAAAACCTGGCTATGACT  
TCTTAGGGATGAAAAGTGGTGTGTTGGATTATAGAGGTTTGGAGATGAAAATGA

Potri.004G211800.1 (GATA family)

GCAAGCAAGGAAGCAATGAAGGAAGGGATGAGTAAATCTTGGTTTTTCGACAAGGA  
TTTCAGTGGGGTTCCGGATAATTTTTTCGAGGATACTTTGGGGTGCTTTGATTTCCCA  
TTGGAAGATGTAGAACCAAATGGTGATGATGGAGAAGACTGGGAGTCTAAATTCCG  
ACATCTCGAGCCCCCTTCCTCTAATCTTTTAACCACTTTTTCAACCGCTCTCTGTGGT  
GAAGATGCCTCCTCCCTGGAACCAACTATAACTCTTGTTTCGGTTTTGCTTAATGGAT  
CTTTACAGTTAAAACATTGGGCAAGCTCTGCTGAAGCATCTTCAAGCAGAAGCAAAC  
CCATCCTTTGTTCGGTCTTCAGACAGCAAATATTCTCATCTGTTCCAGGCCACCAGCCC  
AGTTTCTGTCTGGAAAGCAGTGGCAGTTCTTGTCCACCGAAAATGCGACAACATA  
TTACCCCAAATTTGTCACACCAGTAAAGCGCCCTCGAAGCAAGCTGCCACGCCTCCG  
GCGACAGACATTCCCTTTCATCCCCACTGCCTGTGCCTCTAAAAAGTTTTATTGTTTCG  
GCTTCTTCAGATCCAGAATTAGAATACTATAATGATGAGGAAATATTGGATTCTTCC  
AGGAAACAACAGAAGAAAAGGAATCTGATGCTGCTATCTTCTGCAGTAGAGATGGC  
GCCGAAGATGAAGCAGCCAGTTGAAACCAGGAGATGCACACATTGTCAGGTGACAA  
AGACTCCACAATGGAGAGAAGGACCATTGGGGCCAAAACCCTTTGCAATGCTTGT  
GGGGTTCGGTACAGATCAGGCCGCCTCCTTCCAGAGTATCGACCAGCTGCCAGCCCT  
ACCTTTGTTCTTTTTTGCACCTCCAACCTCTCACAGGAAGGTGTTAGAGATGAGAAAG  
CAGACGTAGCAGGTGACCC

Potri.005G001600.1 (MYB family)

CATTGCAGGTTTTGTTGCACTCCACATGGGAGGCATTCTTGCTGTTACAAGCAGAA  
GTAAAGAAAAGGCCTGTGGTCTCCTGAGGAAGATGAGAACTTCTGAATTATATTAC



TAAGCATGGACATGGCTGTTGGAGCTCTGTCCCTAAACAAGCAGATTTGCAGAGGTG  
TGAAAGAGCTGCAGGTTAAGATGGATTA ACTACTTGAGGCCTGATTTGAAGAGAG  
GAGCATTTTCACAGCAGGAAGAAA ACTTGATAATTGAACTCCATGCAGTTCTTGCA  
ATAGATGGTCTCAGATTGCAGCACAGTTACCTGGAAGAACTGATAATGAGATAAAG  
AATTTATGGA ACTCCTGCATTAAGAAGAAGCTGAGGCAGAGAGGCATTGACCCCAA  
CACTCACAAACCTCTCTCTGAAGTTGAGAATTGTAAAGAGAAGCAGCAGCCTACAG  
CTGACAAGAGCAATGAGAAAAGTTTCTAATGTATCAAATGAACTGAACCTCATTGAG  
GCAGCTACTTTACAACCACCTGCAATTTCTTCCAGCTCAAAGATCAACAACAGTAAG  
GACAGGAATAGTAGTAGCAGCAACATGACAAATACACCACCGACAAAGGAATTCTT  
CCTGGATAGGTTTGGTACCTCCCATGAAAGCTCCCCTGCCAGTTGCAGGCCTTCTGA  
TTTGATGGGGTATTTTCTTTCCAGAAGTTGGATTACAAACCTAGTATAGGCCTCTCA  
ATGAATCCAAATACC ACTCTCTGCTTCAATCCAAATTCCTCTTCTGAGATGATTTCTC  
ATGAGTTCAATTCTTGTATGACACCACCGACTATTCTCCCATCTGTTTCAACCTCTAT  
GTTCCAAACTCCAATACGTGTAAGCCTTCTGTTAGTCTTCCATCTGATCATAATCCT  
TCTGTAGGCTCTTGTGATGTCAATGGGGTTCAGAACTGGGAAGCAAGTAGCTTCAGC  
AACAAATGGAAGTGGAAGCAATGGAAGCAGTAGCAGTATTGAATTGCAAAGCAACAC  
CAATTTCTACGAGAGCAGCGCTTTCTCATGGGGGTTAGCTAATTGTGGGAAATCCGG  
CGAGGAATCTCACCTTCGGTCACTCGAAAACGACACAGCTGAAGACATCAAATGGT  
CTGAATATCTTAACACCACATTCTTTCTTGGAAAGCACAATACAAAACCAAACATCTC  
AACATGTGTACAGTGAAGTGAAACCAGAAACACACTTCATAGCAGAAGGGTCAAGT  
GCTAGTTGGATACCGAACCAGCATCAACAAGCTTCACAGCCAGCAGACATCTATAC  
CAAGGATCTGCAAAGACTTGCTGTGGCTTTTGGACAATCCCTT **TAGAC**

Potri.005G039800.1 (bHLH family)

**ATG**GCACTGGAGGCTGCAGTCTTTCAACAAGACTGGTTTGGCCACAGCAGCAAAGA  
GCTCTACA ACTTGCTTGGTGGGAATTGGAGCTATGACTTTGGCCTAGACCAAATGA  
AGAAGATCAAGACAACAGCTGCTCTTCTTATTTTCTCGAGAACCAAACAGAAACATT  
TCTTCATGAGGATTGGA ACTCTTTCCAACCACCTAATTCCATGGTGCCTCACTTGAAT  
GATTTGCACCTAACATGTAGCAACAATATTCCATCCTCATCAGATGCAAGCATTGAT  
GCAGCAAATGGACTATTGAGTACTGCTCCTCCA ACTGGTGATCATCATCACC ACTTG  
GGTGATTCATCAACAATGCCTGCTACTCGTGTTAAGAGAAGGAGATCGAGGAGTAA  
GAAGAACAAGAAGAGATTGAGAATCAAAGAATGACTCACATTGCTGTAGAGAGA  
AACAGAAGAAAGCAAATGAACGAGTATCTTTCAGTTCTGAGAGCTTTAATGCCTGA  
GTCTTACGTTCAAAGGGGTGATCAAGCATCAATTATCGGAGGTGCTATTAATTTTGT  
CAAGGAGCTTGAACAAAAGATGCAAGTACTTGGTGCCTGCAAAAAAATGAAGGAAA  
ATTCTGATGGTGATAATCAGCAACATGTTTCTTCACTGCCTTTTCTCCGAGTTCTTTAC  
ATTTCCACAGTACTCAACAAGCTCAATTCATTTGAAA ACTCTGTTGGCAAGAATGA  
AAAGTTGCATAAGACTCAATCTACTATAGCTGACATAGAAGTGACCATGGTAGAGA  
GTCATGCCAACCTCAAATAAGATCGAAAAGGGCGGCCGAAACAGCTCTTGAAGGTT  
GTTTCTGGGCTGCATAGCATGCGCCTCACTGTTCTTCACTAAACGTCACAACGGTT  
GATCAAATTGTGCTTTATTCTCTAAGTGTCAAGGTAGAAGATGATTGTAAGCTGACT

TCAGTGGATGAGATTGCTACAGCAGTGTATCAGATGCTAGGTAGGATTCAAGAAGA  
GTGTGTGCTGAATTGT**TAG**AAAGTTTACTATTAATTTTCCTTTGTGGTTGGCCCTCTA  
CACACCATATGAGGGCAATTTCTGCATTTTTAGGCAGTCTCTGAAAGGCTCATCGCG  
ACTAATGTCTCTCCATTTTATTCCTAGTGTAGCTTAGTCTGGTTGGTCTAATTTGGA  
TGTTTCTGTTCTCTATTTTGTAACTTTTTTCTCCACCTTTTTCTTTTTGTAGTTTTTCT  
AGAGCATCTTGTGTATGAGCCACACATAGATGCTTGGTCAATTCAAACCATCTTTAA  
TGCCTTGCCCAAGCATATTTTTTTGTTCTAGTTTGTACTAATACTCTCTCCTAACCTCT  
ACGGCTCAACCTT

Potri.005G063200.1 (MYB family)

**ATG**TTAAGGTCAAAAAACCAGTGTTTATACATGTATATTTATGTATCTATACATATCT  
TATCTTGCATATAAAGAAAAGTGACCTCTCATCTGTAGCCCTAAAACCAATTCCT  
CCTGTTCCATCTCTCTGCTTATTCATCTTCTTATATTTATTGAAGATCTTCCCTCGTG  
TGGGGTGATTTCTGCCATAATTTTGCAGTTGTGTTAGAATATTTATGTGAGTTTAAGC  
TTCATGTGATGGAAGATTTTAGGGGTAGCTCAAGCAGTGATAGTGGGAGGACTAGTT  
GTCATAGAGGGCACTGGAGGCCGGCTGAAGATGAGAACTTCGGCAACTTGTTGAT  
CAATATGGTCCCTCATAATTGGAATTTCAATTGCTGAACATCTTCAAGGAAGATCAGGG  
AAAAGTTGTAGATTGAGATGGTACAACCAACTTGATCCAAATATCAACAAAAGGCC  
TTTTACAGAAGAAGAGGAAGAAAGGCTCCTAAGAGCTCATCACATTCAAGGAAATA  
GATGGGCTTCAATAGCTAGGCTCTTCCCTGGCAGAACCGACAACGCCGTGAAGAAT  
CATTACCATGTTGTTATGGCAAGAAGGAAGCGTGAACGCTGCTTAACTGTCCATGGT  
AAGAGAAGTAATTTCCAAATCCAATATCCTAGTGATCATCACCATAGAAATAGCAGT  
ACTAATCCTGGTAGAAATTTCGGGTTCTTTAGGCCACAAGGGTCACCTGACTTTGGT  
TCTAAATTAGGGTTTCAGAATAATATTATTGAAAGAGCGGGTAATAAGATACCCATG  
TCCTCAACAAATTCATCTCCTTCTTGGACTAACATTAGTGCTTCAAC**C**ATCACAAATG  
ACTCATTAAGTTTTGATGTCTTTGATGCAAAAAGAAAGGATTATATTCATTCAAGCT  
CTTCTTCAATATATCCTAAAGGGGGGCCACTTGCTTTGAATGAATCTCTTCACTGTAC  
TTACCATCCTAGTTCTACCATTGATGGTGGTGATAAGTACCTAAATGTTGTTGGACA  
ACAGATCCCTAACGCTAAGAAAGTTGTCCCTAATAATCATTTTGCATTCAAGTTA  
TGGTGATGGTTATGGAAGCAATAAAGAAAAGATTATCGAAAGCCAGCTAGTGAGAC  
TCGATAGCGATCATCATGACTCAGCTGCATTGTGGAAATTGCCAATGGCTTCTCAGC  
AAGAGCAAGGAGATCATGGAGGTCAAGTTAAGAACCAGGACGTTGCCTTTATAGAC  
TTTCTTGGTGTGGGGATCTCT**TAG**

Potri.005G090300.1 (TCP family)

**ATG**TCAGACAACAGTGGTGCTGTCAATAACGGAGCTTTGATAGACCCACAAAGAAA  
CCAGCCGCCGGGAGGTGGTGGAGGAGGAGGACTACTAATGGAGCTTTAGCTGTTA  
AAAAACCACCTTCTAAAGACCGTCATAGCAAGGTTGATGGTCGTGGAAGGAGGATT  
CGGATGCCGATCATTTGTGCTGCTAGAGTTTTTCAGTTGACTCGTGAATTGGGTCAC  
AAGTCTGATGGACAAACTATCGAATGGCTTCTTCGTCAAGCTGAGCCTTCGATTATT

GCTGCTACTGGGACCGGAACTACTCCTGCTAGTTTTTCTACTGTTTCTGTTTCGGTTC  
GTGCTGGTGGTAATTCTAATTCAATATCTTCGCTTTCAGCAATAATGTTTCATTCAGC  
TGCTTCTTTGGACCATAAGCCTTTGTTAGGCCCTGCGCCCTTTATACTTGGAAAAAGG  
ATGCGGCCAGAGGAGGATGGAAATGGTGGGAAGGATGATGGTGGGGTTTCTGTGGG  
CCCCACTATCGGGTCTTTAATGGGGCCACAGCAACAGCCGCAGCGGGGTCTGGCG  
GGTTCTGGGCTTTGCCTGCAAGGGCTGATTTTTGGGGGTTTGGCTGCTGCACCTCCGG  
AAATGGTTGTGCAGCCACGGCGGTGCAGCAGTCGTCGCTGTTTATGCACCAGCAGC  
ATGCTGCCGCCGCTGCTGCCATGGGAGAAGCGTCGGCGGCTAGATTGGGGAATTAT  
CTTCTGGTCATTTGAATTTGTTGGCTTCATTGTCGGGTGGGTCTGGGAGTTCAGGAA  
GGAGAGAGGAGGATCAGCGTTGA

Potri.005G094900.1 (NF-YC family)

ATGGACCAATCAGAACAACACTCAACAGCAACAGTCCCAGCAGCAGCAGCAGCAACC  
AGTAATGGGAGTAGCAGCTAGTGCAGGTCAGGTGGCCTATGCCTCTACTCCCTACCA  
AACTGCTCCAATGGTGGCTTCTGGGACTCCTTCCATAGCCATTCCTCCCAAACCTCA  
GCCTCCAGCCACCTTCTCTAATTCACCCACCAGTTACCTACCAGCAAGCCCAACA  
TTTCCACCACCAACAGCAGCAACAGCAGCTTCAGATGTTCTGGACTAACCAAATGCA  
TGAAATTGAACAACAACACTGACTTCAAGAACCATAGCCTTCCACTTGCTCGGATTAA  
GAAGATAATGAAAGCTGATGAAGATGTACGAATGATTCAGCAGAGGCTCCTGTTA  
TTTTTGCCAAAGCATGTGAAATGTTTCATCTTGGAGCTCACTCTGCGCTCTTGGATCCA  
CACAGAAGAGAACAAGGAGGACACTACAAAAGAATGATATTGCAGCTGCAATTT  
CCAGGACTGATGTTTTTGATTTCTTGGTTGATATTATTCCAAGAGATGAGTTGAAAG  
AGGAGGGTCTTGGGGTCACTAAATCAACTATTCCTGTTGTTGGCTCTCCAGCTGATC  
TTCCTTACTATTATGTTCTCAACATCCTGTGGGACCTCCAGGGATGATCATGGGAA  
ATCCAGTTGATCAAGCAGCTACCTATGGAGCCCAGCAGCCACGACCTCCAATGGCA  
TTCATGCCATGGCCACAACCTCAACCACAACAACCTCAACAACGGCAAAGCGACAC  
CTGATCAGAACATC

Potri.005G126400.1 (BES1 family)

AGAGGGAGAGGGAGAGCGTTAGTGGGGGAGGGTTTGCCGGGGAAAATGACAGCCG  
GTGGATCCTCAGCGAGGTTACCAACGTGGAAAGAAAGAGAGAATAACATGAGAAG  
AGAAAGAAGGAGACGAGCTATAGCTGCCAAGATCTATACAGGACTTAGGACTCAAG  
GAAATTATAAGTTACCAAAAACATTGTGATAATAATGAAGTCTTGAAAGCTCTTTGTG  
CTGAAGCTGGTTGGATTGTCGAAGAAGACGGTACCACTTATCGCAAGGGCTGCAAG  
CCACCTCCATCTGAGATTGCTGGCATGCCAGCAAACATCAGTGCATGCTCCTCAATT  
CAACCAAGCCCGCAATCCTCAAATTTTGCAAGCCCTGTGCCTTCTACCATGCTAGT  
CCCTCATCCTCCTCATTCCCAAGTCTACTTGTTCGATGGAACTCCTCCACGTACC  
TCCTCCCTTTCTCCGAAACATAGCTTCCATCCCCACAAACCTCCCGCCTCTTAGAAT  
ATCCAATAGTGCTCCTGTAACCCACCACGTTCTTCCCCTACATGTAGAAGTTCAA  
GCGGAAAGTTGACTGGGAATCCCTCTCAAATGGCTCCCTAAACTCGTTTCGCCATCC

CCTTTTTGCAGCTTCTGCTCCTTCAAGTCCTACACGGCGCCCCATCTAACACCTGCC  
ACAATTCCAGAATGTGACGAGTCTGATGCCTCTACCGTGGACTCTGGCCGCTGGTTG  
AGTTTTCAGGCAGTGGCACCCCAAGTAGCCCTCCTTCACCAACATTTAATCTTGTTA  
AACCAGTGGATCAACAGTGTGCTTTTCAGATTGGAGTTGATAGGCATGAAGGTTTGA  
GCTGGGGAGTAGCAGCAGAAAGGGGGAGAGGTGCTGAGTTTGAGTTTGAGAATTGT  
AGGGTGAAGCCATGGGAGGGTGAGAGGATTCATGAGATTGGGGTGGATGATCTTGA  
GCTCACACTTGGAAGTGGAAAGGTCCATGGTCAAGCCTCCATTGATGATCTAGCCTG  
GGAACGTAGCAACAAGTAGCTTGAATTCATTGCTGATTCATGGCGTAGTTGTTTTT  
TTCTTAACCAATGGCATGCATCGCTTGGGTTTTACCTGAGGTTACTACCAGCTTGGG  
AAGACTGCGAGTTCACATTTGATGCCTCCTATCGTATTCAGATCGA

Potri.005G231300.1 (bZIP family)

CCTCTTGTGGGTTTGTCTCGTTTTTGAGTTTTGATTTCTAAAGTCAAGATCTCGAAGA  
TCCCAAGATTTTCTTTTCTTGTTTTTTAAGGCTGCTACTCTGCCAAAATCCTGTCAA  
ATCTTGATGCTGCTGGTTTGGATCTTAATGTTTGGAGTTCATGTCTCCAGTTGTCAGT  
GAAATCATCCGGTCCGGGTTTATGATCAATCCTCTTTCAGACGCAGGACCCATCTT  
GTTCAATCTTTCTCGTTGTGTTCCTTTACTGGTTCATGTTTTTTCAGAAATAATCTT  
TCAACTCTGCCTGGTTTGTAAATATAATAAGTAGTAGAATAAATTGTTATCTTTAA  
CAATTTGAAATCTGTAAGGTTAGAACAATATTAAGATCTCATTTTTTATTGAGATCT  
GTTATTGGTGGTACTATTTTTGGTGTGTGTGTGTGTATATATAGTCTTTGTGTATCTATAT  
GGCATCCTCCAGTGGGGATTCCCTCAGGTTTCACTCAGCTCCAAAACCTCAGGCTCTGA  
AGAGAATACGCAGATGATGTTGGTGGATCAAAGGAAAAGGAAGAGAATGCAATCA  
AACAGAGAATCTGCAAGGAGATCCAGGATGAAAAACAGAAGCACTTGGATGATTT  
AATGGCCCAAGTGACACAGCTAAGGAAGGACAATAACCAAATCCTTACAACCATCA  
ATGTCACAACACAGCACTACTTGAATGTTGAAGCCGAGAATTCTATTCTAAGGGCAC  
AAATGATGGAACCTGAACCATAGACTTGATTCTCTTAACGAGATCCTCAACTATATCA  
ACACGAGTAATGGGATTTTTGAAAATGATCATCACGAGGATCTCCCTGATCATAGCT  
TCATGAATCCATCAAATCTGTTCTATCTTAACCAGCCCATCATGGCATCCCCAGATTT  
GTTTCAGTATTGATCACCATCACCATCCCCACCATCCCCATGGGTTGGGAATTGGTC  
AATCCAAGGCTGTCTTGTTCAGGCGCAATAAGTGGAGTGGAAAAGGGAGGGCCTTT  
CTTTTTTATGTTGAATATTAGTTAACTAGGACCTAGAATGAAGTAATATTATGATTA  
ATGAGAGTGGTGCATTGAGCTAAAAAAAATGCACCTAGAACAGGGGAAATTGAT  
TGGTATTTTCATATTCTGGCAATTTGGCTTGTAAAGTTGTAATTTGTGCTATAAATAT  
GGTGTGCAAGGCCCTGGATGTGTGTCATAATGTCCTGTCTCTTCTGAACGGTAAATT  
AATGATATTATTTCTAATAATTGGTGTGGGCTACA

Potri.006G016200.1 (GRAS family)

GACGAGTGAATTTAGACTTGGCAGCTGCCTCGCTGTTTATAAGTGTTTCAGTGATTAT  
AGCATGTGGCATTCCAAAAGTCATTGCGTTGCCAAGTGAAGGTGACAGTTCTGATAG  
AAAAGGCTAGTTATCAATTCCACGATCTCTTGTCTGAGCTAAGCCCACCAGTGAAC

AGTTCTAGATGCAAACCTCTCAGAAACACCGATCAGCTGGCATCCATGGGTTTTACC  
ACCAGCCAGTGCAAGAGATTGATCCATATGGTTTGTCTCATATCCAAATTTTAGACA  
AGACTCTGTATTCAGATGCTGGAAGCCAAGGAACCAGTGTTTCCTTTGAGACATGTC  
TAGGACAATTCTTACCCTGGAATCATCCTCAGCGACTGCTGGTTTCGTTGTCTATGA  
TTCTCCTGCTGCCAGCATCTCATCCAACAGAAGCCCCTTTTCATCCCAGGGTTCACAT  
TCATGCATTTCTGATCCTCGTCATTCCCCTGAAAATATGTATGGATCTCCTTTGAGTG  
GATCTTCCTCTGCTGATGACGGCAATATACTGAGGCAGAAATTGAGGGAGTTGGAA  
ATTCATTGCTTGGGCCTGAATCTGATATTACTGACAGCGGCAGTTTTTTGCTTTGTGA  
GTGGAGGATACCAAGCAGAACCATATGCAAGTTGGGACTGGAACCAAATGATGGAA  
ATGATCCCTAGGTTGGATCTTAAGCATGTGCTCCTTGCCTGCGCTGATGCAGTATCA  
AATGCTGATATACAAAGATCAGCAGGTCTAATGCATGTTTTGGACCAAATGGTGTCA  
GTCTCTGGAGAGCCAATCCAGCGGTTGGGTGCTTATATGTTGGAAGGGCTTAGGGCA  
AGGTTGGAACTCTCAGGAAGTAAAATCTACAGAGCCTTGAAGTGTGAAGCACC  
CAGCTCAGATCTGATGACTTACATGGGCATTCTCTATCAGATATGCCCTTATTGGAA  
GTTTGCATACACATCGGCTAATGTTGTCATTCGAGAAGCTGTAGAATACGAACCCAG  
AATTCATATCATCGACTTCCAGATTGCACAGGGAAGCCAGTGGATTCTTCTAATGCA  
GATGCTTGCTTGCCGGCCAGGTGGACCCCCAGCAATTCATATAACTGGCGTTGATGA  
TTCTCAATCAGCTGATGCTCGTGGTGGAGGACTTGATATTGTGGGACAAAGGCTATC  
AAAAGTTGCCGAGTCCTGCAATGTGCCATTTGAGTTCCATGATGTTGCCATGGATGG  
TTGTGAGGTTCAACTGGAACATCTTAGGGTCCAACCTGGGGAAGCTGTGGTTGTGAA  
TTTTCCGTACGTGTTGCACCACATGCCTGATGAGAGTGTGAACACATGGAATCACAG  
AGATAGATTGATAAGGATGGTGAAGAGTTTGTACCAAGGATCGTGACCCTCATCG  
AGCAAGAATCCAACACTAACACCAAACCATTTCTTCCAAGATTCATCGAGACACTA  
GATTATTATGCAGCTATGTTTGAATCTATTGCCGCTGGTAGCTCTATGGACTTCAAGC  
AGAGGATTAATGCAGAGCAGCAGTGTGTGGCTCGAGACATTGTCAATATGATCGCTT  
GTGAGGAAGCTGAGAGGGTTGAACGGCATGAACTTCTTGCGAAGTGGAGGTCTCGA  
TTTACCATGGCAGGATTTAATCAGTACCCACTGGGCTCTTCAGCGACTACTGCCGTT  
AAAGATTTGTTGAAGGAATACCACAAGGACTATAGTGTTTCAGGAGAGAGACTGGGC  
TCTTTACCTTCGCTGGCGAGATAGAGACATGGCAACTTCTTCTGCCTGGCGGTGAA  
ACCGAATAGCTTCAGCTCCTTAAATGTAATCTGTAAATGTAATCTTACCCTTTTTTTT  
CTCATTTAGAGAACGATCAGTAGTGATGTTATCATTCTCATAGAAATGGGATTAGCT  
TTTTTTGGGAGAATACAGCTAGTGTTGAGACAACCTCAAATCATTGTACATGTCCAC  
CATGGAATGAAACAAGAGTAGGTCTGTGTTATTTGCAGTCTCGGAGTTCAAAGTATG  
CAC

Potri.006G037100.1 (bHLH family)

ATGCAGCCTGAAAACCTGTCAGGAGAATTCACAGTTGTACCGGTTTCTTACCGAGAAT  
GGAATGATTAACGTTGGTCCATACGGTTTTCCGGCTGCGATGCAAACCTTGTGTACC  
TCATCTTCCACTTCCCTACCATAACAGTAATTACCACTTTGAAAGGTCTGTGATAACTG  
ACATGACACCAGAAGATAGAGCTCTTGCTGCCTTGAAGAATCACAAGGAAGCTGAG  
AAGAGAAGGAGAGAGAGGATTAACCTCTCATCTTGATAAGCTTAGAGGCCTCCTTCT

TGCAATTCCAAGACAGACAAAGCTTCACTTCTAGCAAAGGTTGTTCAAAGAGTTAGA  
GAACTGAAACAACAGACCTCAGAGCTTCCTGGACTTGAATCTTTCCCATCAGAAACC  
GATGAAGTCACTGTACTTTCTGGTGAATATTCAAGTGATGGACAATTAATATTCAAG  
GCATCTCTGTGCTGTGAAGACCGGTCGGATCTCATGCCAGACCTAATCGAGATACTG  
AAATCTCTACACTTGAAGACATTGAAAGCAGAAATGGTAACACTAGGAGGAAGAAT  
TAGGAATGTTCTTATCATTGCGGCTGACAAAGATCATAGTGTGCGAGTCGGTCCATTT  
CTTGCAAAATGCATTGAAGTCTTTACTAGAACGCTCGAATTCTAGCGAAAGATCGAA  
AAGGCGAAGGGTATTAGACCGAAAATTAGTAATCCAATGATGATTAATATCGTTCAT  
GTGCTTGTCTTAGTCTCCTTTTAATCTTTTTTTTTTTTTTTTGGGAATATTCTTAGGTGTTGC  
AGGCTTGTGATGTAGTCTGGTTAATCTCTATTGTGTGGCTTTGTTTGTTTTAGTGTA  
ACCCCAAAGAATTGAAGGGAAAAGAAAAGGGAAACGTATTTGTGTGATTTAGTCTG  
GGTTTTTA ACTGGTCTAGGGTTTTAGGATATTCTCAGTCTCCTTCATGGGATCATATC  
TTACATGTAAGGGGATCATAGAGCAGAAGAATCTAAGAATCTGAACTGAAGATGAC  
GAAGAAGATCAGAAATCTTTGGACGTTGAATGGCTATG

Potri.006G049200.1 (HSF family)

GGTTTATTCTGACTAACATGACATGGTTTATTCTGACTATATATATATACATATAAGA  
ATAGTCTAGCCTTAGAAAATACGTTCCAACCATTTCTTTCTTCTTGAAAAGAGAGAG  
AGAAAAGAGAAAGGAAAAGACCTTGCATTTCTCATGAACTGTGGAGTCGTCTTGCT  
GGGTTTTTATTGTTGGGGTTGGGAGTTCTTAACAGCCCTTCTTCTTCTCTGCCTCTT  
CTCCTTAAAAATCTTGAATATCATCCAATAATCTCCTTTTCTCTTTGTTTTTTTTTCC  
TTTCTTCTTTTTCTTTCGAATAAATTCATGGCAGATGACAAGGGTTTATTAGAATATGT  
TAGAAAATCAACCCCGCCACCTTTTTTATTA AAAACCTACATGTTAGTGGAGGATCT  
GGCGACCGATGATGTGATATCATGGAACGGGGAGGGGACCGGATTTGTGGTGTGGC  
AGCCGGCAGAGTTCTCTCGTGATCTCCTACCAACACTCTTCAAGCATAGCAATTTCT  
CTAGCTTTGTCCGGCAACTCAATACTTATGGTTTTTCGAAAAGTTGCAACGAGCCGGT  
GGGAGTTTTGCAATGACATGTTTCGGAAGGGAGAAAGAGAGCTACTACGCCAAATT  
CGTCGAAGAAAAGCTTGGACTAACAAGCAACAACCTATTGCACCGTTAATTCAAGT  
CGCACCACAAGAGTTTGAAGAAGATCAAAGATCATCATCCACTTTATCATCGTCCGA  
ATACACTTCTTAGTTGATGAAAATAAACGACTCAAGAAAAGAAAATGGGGTCTTGA  
GCACTGAGCTTACTAGCATGAAAAGAAAGTGCAAGGAGCTACTTGATTTAGTAGCT  
AAAAACGCACATTTGGAGAAAGAAGAGGAAGATGAAAGGCCAAAGTTGTTTGGTGT  
GAGATTGGAAGTCGAGGGGGAGAGGGGAGAAGAAGAGGAAGAGAGCAGAGATTAG  
AGAAAGTGCAACCATTTTACTATCTCAATTAATGCAAATAAAAATGTGTGCCATGTAGA  
ATAATCCAAGGACAAGTCATCAGCTACTAAAACAAAAAATGAAGTAGCTAG  
CTTAATTAGACACAGAAAAGTTTGAAGTTGTATTCTCTGTTGTTGTTGCTGTAG

Potri.006G057600.2 (bHLH family)

ATGGATTTCGAGTAGTAGTCACAACCTCCAGTTCAGGGTCATTGAGATTTGCTCAGCT  
CGGAGTTCACTTCTTGCAAATTTCACTGATAATGGAGTCGACAATGATTCTGTTTTGA

ATTTCCAAGACTTTGAGGATAAATCCGCTGCAAGAGTGAGAGAGGAAGCTGTTAAT  
TATTCATGTTTGCCGCGGAGTTATCCAGGTTTGCCTCCTCATTATCCAAGGCAGAGTT  
CAGCTACAAGTTCTTCAGCTATGGATAGTTCATATGGTTTGATTGGTTCAATATCAAT  
TGGTCATCATGAGCAAGTTGAAAAGGTTGATTCAAATCCTGCTAGGCAGAATAGCTC  
TCCCGCTGGACTTTTTGGGAACCTTACTGTTCAAATGGCTTGTTGTCACAGATTTCT  
GAAATTGGGAGCGAAAGCATGGAGGCAGGCAGCCCTGACAGTGGAAAACCTCTCAA  
GTGTCAGTGTTGACAGTCGATTTTATAGCAGTCACGGGTTTCCGTATGGTTCTTGGA  
ATGATTCGCATTTGTCAGAGAACTTTAGCAGCATGAAAAGAGAGCAAGAAAATGGA  
AACTTGTTTTCTAATGCTCAGAACGGGAGAACTTGGAATCGGGCTCATGTATTATCC  
CACCCTTGAGTTTGCCAAAGACTGCAATGGAAATGGTTGCCATGGAAAAGTTTCTC  
CATTTCCAAGATTCTGTTCTTGTAAAATTAGAGCAAAGCGTGGTTGTGCCACTCAT  
CCTCGAAGTATCGCGGAAAGAGTGAGAAGAACTCGGATCAGTGAAAGAATGAGGA  
AACTACAAGAGCTTGTTCCAAACATGGACAAGCAAACGAACACAGCAGACATGTTA  
GATTTGGCTGTAGTGTACATTAAGACCTTCAGAAACAGTACAAGACACTAAGTGA  
CAACCGAGCCAACTGCAAGTGTTTAAGCAAGCAGAAGCCAGTGCAAAAACAGAATTG  
TTTGA GGTGCTTCTGTACAGAAATCCAAGGGGCTGTTGACACCAGTTCCTTGTGATCTT  
TAGCATCAGTAAGCG

Potri.006G130200.1 (S1Fa-like family)

CAGTCATGGAAGACGATTTGAGTTCTCTAATTCTCCTCCTTCCAAAACATGGG  
GGATTTGATCAAGGATGCTGAGCCTAAAGGGTTAAACCCAGGATTGATAGTGCTGCT  
GGTTATTGGCGGGTTACTTTTGACATTCTAATTGGAAATTATGTACTTTATTCGTAC  
GCGCAGAAGACCCTTCTCCGAGGAAGAAGAAGCCCATCTCGAAGAAGAAGATGA  
AGAAGGAGAGACTGAAGCAAGGTGTCTCAGCACCAGGAGAGTGA

Potri.006G184800.2 (WRKY family)

CCATTTCCGGTACAGTGTATAAAGGGCAGTTGTAAGTGTTCGAACTTCACTCAAGT  
GGCCATGGCAGGGAGTGAGAGCTTCGAAGCTCTCGAAGTGCAAAAATAATGAACAGA  
AACGACAAGGAAATGAACAAAACAACGGTAATTTTGTAGAAGAAGAGGAATTAGA  
AGGCGATTATATTGAGGAGGAGGAGGAGAGTCAACTCAGTGAGTTGCAGCAACTTG  
TCGAGTTGCCGAGTTCGCAGGTGGAGGAGGAGATGAGGGATGGGCAAGTGGAAACC  
CTAACGGTGGTGCCGTCTTCTTCCACGGCGATACTATCGAAGGAGAATGATCAGCAT  
GTAGGTTTGAAGGAAATTCAGCATTGAAAACGCACGTGGAAGCTGAATTCAAGGA  
GCAAGTAGGCTTGTCGCACCAGGAAGTTCTGGGAAGCGTAACAGCCCAGAGTGCTA  
AAGCCCAGACCCAAATCAGCTTCCACCTTCTGCATGTCCAACCTCCTCGTCAGAAC  
TGTCACTAACTTCTGTTACACAACCTATATCATCTGCTCCAAGTCCAACCTCCACCAG  
AAAAAGATTGTCTCCCCCAGAGGTTAAGAATGCATGTATACCAGAAGCAGGGCAC  
CAAAGTTCTGCCAAGCTTAAGGCTCTCCATGTTCTGTAGCAAGGACATCAATTCCA  
GATGGGTACAACCTGGCGGAAATATGGTCAGAAGCAAGTGAAGAGCCCTAAAGGTTT  
TCGAAGTTATTACAAGTGTACTTATTCTGACTGCTGTGCTAAAAAGATCGAATGTTT

TGATCACTCAGGCCGTGTGATAGAGATTGTTAATAAAGGAATGCACAGTCATCCACC  
TCGGAAGAATAACAGCACTAGGGAAAGTAGGAGTGGATTATCTGTTGGGCCTATTTT  
GCAGACTACTGTAACCTGAGCGTACTGTCAGAATGCTCAAGGATTCAGAACCAGTCA  
CATTGTCAATAGAACCTGCACAAGAAACACCGACAGTTTCTGAAAGAAAACGACAG  
AGTTCAAGCAGCTCGGATGAGAACAAGGAAACTCAAATCAAAGAGGAGGATGTCG  
GTGAACCTGAGCCAAAACGAAGATTGAAGAAGGGAAACTTAGAGTGTTCAAAGGCT  
GCTTTAAAACCCGGAAAAAAAATAAATTTGTCGTGCATGCAGCAGGTGACGTGGG  
GATCTCAGGTGATGGATATAGATGGCGCAAGTATGGACAGAAGATGGTGAAGGGAA  
ATCCCATCCCAGGAACTATTATCGATGCACTTCTGCTGGATGTCCTGTCCGAAAGC  
ACATTGAAACAGCAGTAGATAACACGAACGCTGTCATTATAACATATAAGGGAGTA  
CATGACCATGACATGCCTGTACCGAAGAAGCGACATGGCCCACCAAGTGCTCCGCC  
TGCTGCTGCTGCTGCTGCTCCTGCGTCCTTGAGCAGCTTGCCAATTAAGAAAACCGA  
TACATTGCAAACCAAGTTGCTTCAACCCAGTGGTCGGTGGGCAAAGAAGGCGAAT  
TAACTGGTGAACCCCTTGATCTCGGGGGTGAGAAGGAGGCGGCGATAGAATCAGCT  
CGGACGCTTCTGAGCATTGGGTTTGAAATCAAACCTTGC TGA AAAAGCTGAAAAGATC  
CTTTCTGTCTAGGTTACAGTATAAAGATTACCAGTGGGCTGTCCTCATTTATATGAAA  
ATCATGTAGCTTTCTTTCAATGTAAATTATCAGGTTTGAGGATGTCTTTTCGTTTTTT  
TCTTCTACTTCAGTATTTTCAGCT

Potri.006G201900.1 (NF-YA family)

CTGAATTAGTTTGAACCTTTGAGATAAAGACGGTCAAAGCAATCAGTCAGGTCAATTT  
CAGAGGGAATTTA ATG GCTATGAAAACCTTTTTATCTCAAAGAACATGAAGGAAGTG  
TCCATAATCCAAATGGGCAGTTGTCAACAGTGCCATGGTGGACTGCATTTGGGTCTC  
AGGCTGTTAATGGTGAATCGTGTGGCCTATTGAAGGCTTTACCCATAGAACAGCCTG  
CCGGTGGAGGTGAAACTGCTACTAAGCTCGCCAGGATGGGTACTGAGCAAGGGTTG  
GATAAAGGGAATATCACTCAATTCATATATTTCCCGGTGACTGCAAACCTTCAGGT  
GGTGGACAGAAATCTGTTTCAGGGAGCCATTTCACTGCAAACAGCTCTGCCGGAATAT  
TATGCTCATTTTGACCTGGGATTTGGTCAGCCTGTGATCTGCGCAAAGTATCCTGTCTG  
TGGACCAATGTTATGGATTATTCTCAACTTTTGGACCTCAAATTTCTG (Deletion:GGCCG  
GATTATGCTCCCAATGAGCACGACCACAGATGATGTACCCATATATGTAAATGCGAA  
GCAATACCATGGAATCATAAGACGTAGGAAGTCCCGTGCAAAGCTGCACTGGAGA  
ATAAATTGCCAGAAATCGTAAG) CCTTATATGCACCGTTCACGCCATCTCCACGCA  
ATGCGCCGACCAAGGGGATGCGGTGGCCGTTTCTTGAATACGAAAGAGTTGAATGA  
TGAAAAGGCATAACAGAGGCTAAGAAAGCTGGTGATTTTCAACTTTCGCAGCCAA  
CTGGTTCTCAGAGTTCTGAAGTCCTGGAATCAGGTGGTGCAACTTTGAACTCAATGG  
AAGCAAATTGTGGTGGATCAAATCTCTCTGGGTCAGAAGTGAAGTACTAGTTTGTACAACA  
GGGTAGATTTTCGATCGCTTCCCTTTCAATCATCATGGGCCAACTGTCCATGGTTTCTC  
AGGGATGGACGGAGGGCATGGCATTGGCATTGGCATGCCAGTAAGTGGATTGCAG  
CAGCTGACAACCTGCAGCAACCTCAAATAGCAAGGGAACGGATTGGGTTGGTGCTTG  
C



Potri.006G221500.1 (MYB family)

ATGGGTAGAAAGTCCTACAGGGGGGATAATTAGAGGAACTTGGACTGCTACTGAAGACAAAATTCTTACAGCATATGTTAGAAATTATGGTGAAGGGAAGCTGGGCTAGGGTTCCAAAGGAAACAGGTCTGAAGAGATGTGGCAAGAGTTGCAGGCTTCGTTGGCTGAATTATCTAAAACCAGATGTTAAAAGAGGAAACATTAGCCCAGATGAAGAAGATCTCATTATTAGGCTTCACAAGCTCTTAGGCAACAGATGGGCTTTAATAGCTGGAAGGATTCCAGGTCGGACGGACAATGAGATCAAGAATTACTGGAATTCAACCTTGAAAAGAAAGGTACAAGCTAACGATCAAAAACAGCCTAGAAGAGGGAATAAAGACACAAAAAAACAAACCAGAAAGACCTCAACAGGATTGAATAAGGCGGCACCATGCACAAACAGTAGTCTTCCTTACCACCAGTCTTGGCTGAAAATATAGAGACTGATCAGATTCTCACAGCATCTCCATTGAAGAAGGAACCTTGGA AAAATATCTGATAGAAAATCCCAACTCAAATGATGAGCTCTTGCTATTTACTAACGATAATGATGTGCCTTGCAACTTCTTGATGGATCTTGATATGGGGCAGATGAGCTTCTCTGATTTTCTCCAAACTGATATCTTCTCAGATAGCAATAACATGCTTGTTAATGGGCCTGCACCTTCTTATCCAGATGAAGCTTCTTTGTCCCCGAGGCTATGCTGCAGAATTGGATATGTGAGGATGGCTTTGAACTTGAAGTGGCTATGGGTCCTTGA

Potri.006G237700.1 (GATA family)

GGAAGAGCCAGAATATTAGACCATGGAAGCACCGGAATTGTATGGGACAAGTGGGT TTTGCAGCTCACAATTCACAAGTAATGAAAAACACCACTCTCTGGACTCTAATAAGTCCATTGGTGGTGGTGACCATTTCAATTGTTGAAGACCTTTTGGACTTCTCCAATGAAGATGAGGATGCCATGGTAAGTACCCTAGTAATAACAATATCGTCACTCCCACCACCAACTCCACGGACTCTTCCACTGTGACTTTCGTTGATAGCTGCAATTCCTCCTCTTTCTCGGGCTGTGAGCCTTCTGGCTTTAACGGCGATATTGGGTCCCACTACACCAATAATTTCTCTCATCATGACGTTTCTTGGCAGCGAGCTTTGCGTGCCGTATGATGATTTGGCGGAGCTAGAATGGCTGTCGAATTTTGTGGAGGAATCCTTTTCCAGCGAAGACTTGCAAAGGCTTCAGCTTATTTCCGGCATGAAAGCTCGGCCTGACGAATCATCCGAGACTCGCACTTCCAAAGTGATGACAATAACAATGGCAATGTCTCCAATATTTGTAACAACAACAATGTTCAATCCTGAAATGGCAGTCCCAGCTAAGGCTCGGAGCAAACGGTCTCGGGCAGCACCAGGCAATTGGGCCTCACGGCTTCTCGTACTCTCGCTACGACTTCATCATCCGAGCCTGAGATTATTCCTGGCTCGACCCAACATCCCAATTCTGGGAAAAAGACAATTAAGGGTGCGGTGGGGCTGAAGAAAAGAGACGGTGATGTTGAAGGTGGTGACGGTCGCAAGTGCCTGCATTGTGCGACGGATAAGACGCCGCAGTGGCGGACTGGACCCATGGGGCCTAAGACGCTTTGCAATGCGTGTGGTGTAAAGGTACAAATCGGGGCGGCTTGACCTGAGTACCGGCCAGCAGCTAGCCCAACGTTTATGCTTACGAAACACTCAAA TTCGCACCGTAAGGTGCTTGAGCTAAGGCGACAGAAGGAGATGGTAAGGGCTCAGCAGCAACACCAGCACCACCAATATCTTCATCACCATCAGAATATGGTGTGTTGATGTATCCAACGGTGGTGACGATTACTTGATTCACCAACATGTGGGACCCGATTTTAGGCGGATGATCTAGCAGTAGGGGCGCA

Potri.006G267700.1 (Co-like family)

**ATG**GCATCAAAGCTTTGTGACTCATGCAAATCAGCAACAGCAACGTTGTTTTGTCGA  
GCTGACTCAGCTTTCCTCTGCGTCAGTTGCGACTCCAAAATCCACGCGGCCAACAAG  
CTTGCTTCTCGCCACGCGCGTGTCTGGGTCTGTGAAGTCTGTGAACAAGCCCCAGCT  
CATGTCACCTGCAAGGCTGACGCTGCCGCTCTATGTGTCACCTGTGACCGTGACATC  
CACTCGGCAAACCCTCTTGCCCAACGCCACGAACGTGTCCCTGTCACTCCCTTCTTTG  
ACTCTTCCCTCCGCTGCGCACGGCGGTGGAGCTGCCGTTAACTTCTTGGAGTATCGTT  
ACCTTGATGACGTGAATGGTGGGGATGATGTTAGTAGGGAGGAGGCAGAGGCGGAG  
TCGTGGCTGTTACCGAACCCTGGTGGGGGGAATACTAAAGGGGTGGACAGTTTGGGA  
TCTGAATACGGGTCAATATGTGTTTGGGGCGGAAATGCACCCGTATTTGGATTTGGA  
TCGGTATGTGGATCAGAAAGTGGAAGTGGAAGTGCAAGAGCAGAACAGTTCAGGTA  
CTACTGATGGGGTGGTGCCTGTGCAAAGTAACAAATTAGGGTTTCAAGCTCCTGCTT  
TGGTGAATGACAATTGCTGCTTTGAGTTGGATTTCTCTGCTGGATCTAAAACCTTTTGC  
TGGTGGCTATGGCTATAACTCCTTGAGCCACAGTGTTTCTTCTTCATCTCTTGATGTT  
GGAGTCGTACCAGATGGCAGTACCTTGACAGACATATCGAACCCCTTACAGTAGATC  
AGTGAGCAATGGAATGGAGTCGGCAAACCAGACAGTGCAACTATCAGCAGTTGACC  
GCGAAGCAAGGGTGTTAAGGTATAGAGAGAAGAGAAAAGAATCGAAAATTCGAGAA  
GACAATTAGATATGCATCGCGAAAAGCCTATGCCGAAACAAGGCCTCGAATCAAAG  
GAAGGTTTCGCTAAACGTAAGTACTGATTCCGGAGTCGAGGTTGATCGGAGTAGTATTTATG  
GATTCGGCGTTGTTCCATCATTCTAA

Potri.007G023600.1 (bHLH family)

**ATG**CTGTCTCAAAAACACATCTTTTGCATGGATATGAGTGTATTAGAAAGACAGCAA  
GCGAGGTTCAAGTGGTTGCTGCTACTGCAGCAGGAGAACAACTACGTAAACCAATA  
CAATTCCATTGAATCCTGTTCAATGCCTCCTGATCTGTTTCATGGCTTCTTTGATCAT  
GAGTCAATGAATGGAGATAGGATTGATTGGAAGGAGCAGCCCGAAATCTATCTGGG  
GAACAATGATTTACCAAAAATATGGTGTTTTTTTCATTGAATGGCACAGAGTTCGTAGC  
TAATAATAAGATGGATTTTGGAGAAGCAGAGGTAACGGCACGGTCTCTCGAGATTG  
ATCATTGTCTTTCAAGGACTTCTAGTTGCCAAATTGGGGTGGTAGAGGCTGCAAAAA  
TAGAGGAGGTGGTAGCAGTAAATGTGGCAGGTGAAGATGTGACCTTGATGGAGAAT  
AAGCAATCCAACCATGGTAGGAGAGACAATTCAAATAAAGAGGAAAGCAGAGTTTAT  
TGCAGCAGAACAGAGTGACGATAAGATTA AATTAGAAGAAGATGAGCCCAAGGTTA  
AAGAGAAAGGCAGTCCAGAAATTTAGCAGATTCTTCGAAGGAAAATCAGAAGACT  
TCAGCCTTACCTAAGACAGACTACATTCATGTGCGGGCACGTCGCGGCCAGGCTACT  
GACAGTCACAGCTTAGCAGAAAGAGCCAGGAGGGAAAAGATTAGTAAGAAAATGA  
AATGCCTGCAAGATCTAGTCCCTGGATGCAACAAGATAACAGGCAGGGGCCGGAATG  
CTTGACGAAATCATCAATTATGTCCAATCTCTTCAAAGACAAGTAGAGTTCATATCC  
ATGAAACTTGCTGCTGTAAATCGAAGACCAGATACCGACAACGTTTCCGGTAAAGA  
GTCACCTGCTTACATCGCAAGTTTTCCAGCAGCCACTATGTCCTCAACAATTGCCAA  
TTTGCCCCACCTTCAACTGAATCTAGTGCAACAACAGGCAACAAGCAGTAGACCGA  
AAGCTTTGACAGATACTTTTCAACTTGTGCCTGAAAAAGCTACAAGTTCCTCAGCAT

TGATCAATGACCTATGCCTTGATCATTCACTAGCTCAAGTCCAACCTTTTTGGGATGC  
TGA CTCACAAAACCTTCAA AATTTGGGATTCCAT **TAA**AGCTGATCAACTTTTCTTTTA  
TTCATCGATTACTGAAGGCAATTAGTATCCTCCGAGGAATCTACCAGTCTCAGATCA  
GAGATATAATTTAGGGAACTAATCACCATCCAAGAATCCACTTTCAATAATTCAGC  
AATTCTAATAATTTTCGAGCACTGTAAATATTTGCTTCCACATGTATAGATGGATGTTG  
CAAAAACCATCATTAAATTCTTACCAATCAAATTTCTTGCATTGCAAGACTAAAGATA  
TCCTTTATGTCTGTACCTATGC ACTTGGTGATGTCTGCAGATATGCTTTTTGTGCCTTT  
GTATGTCGAGAGAAAAATAGGACCCCATGATTGGTACTAAAAGAAAGGCTGATAGG  
AATTGAAAATGATAGAGAAGGACCCCATGGTTGGATAATTGAAGCAAAGTGGGGGC  
AAGGAAAGGTGAAAGAAAAGGGAAGGAGCTTGTGTTGGGTTGGATGAGCTAGCCT  
GCTTAGCAGAAGAAAGCAAAGGAAGCCATTTGATTATAGGACCACAAACCACTGG  
CTTGAGAATGTGTCTGTACGTAGCTGAGATTCTTGATGACCATTTGGTAGATGCTGTT  
ATAATAAAGTCTTCTTTTGTGGCAAACATCACTATCGTACGTTAGATTCTTTTGT  
ATACTGCTGGTACTATCATATTACAGTAATGGTCCTGAATGA

Potri.007G043800.1 (HSF family)

GAAGTTATGGTCTTGGGTTTGTGGATTCTTACAAAAAAAACCATAGGTCTCATCTTG  
GTAATCAAGAACATCCATGGAAGCAGATAGGCTGAAAC **T**GTTCAACAATCTTGTTA  
GCTCTAAGTTCTTTCT **T**CTGGATTCTATTGCTGGGACTGGGAATTCTTGACTGCTCT  
TTTGCTTTTTAGTTGCTCTGTCTAAAGTGA ACTACGCCCAACAAGGTAATATAGGA  
TTTGTCTTTAATTTTTCTCT **CTC**TTTTTTTTTCCAGTACTTACTGCATAAGTGCACA  
TAGGAAGGGGGATCTTCGCTCTTTTCTGGGGTAGATTAGATATAGGTTTTTGGAGAT  
CTTCGTAGGGGTTTGGTGAGGGGTAGATTTGGAAGAA **ATG**GCGCAGAGGTCAGCTC  
CGGCGCGTTTTTGGACGAAGACCTACCAGCTGGTGGATGATCCAAGCACTGATGATG  
TGATATCATGGAATGAAACCGGCACAACCTTTGTCGTGTGGAAA ACTGCTGATTTTG  
CCAAGGATTTGCTTCCTAATTATTTCAAGCACAACA ACTTCTCTAGCTTTGTTCCGCA  
GCTCAATACCTATGGCTTTAGAAAAATCGTGCCAGACAAATGGGAATTCGCCAACG  
AGAACTTCGGCGAGGACAGAAAGAGCTCCTCGCTGAGATCCGCCGCCGAAAGACA  
GCGGCTGCGTCTCCGACAACCCAAACCTCGCCTGCCGGA AAAATCCGGAGGCGCATC  
CTTTCGTCCA ACTCCGGAGAGGACCTGGGGTCCACGTCAACGTCATCACCGGATTC  
GAAGAACCCGGGGTCCGTGCAA ACTGCGGCGACACAAGTCGCCGACTTATCGATCG  
AGAACGAGCAGTTGAAGAAAGACAACGACGTCCTGAGCAGTGA ACTCGAGCAAGCT  
AAGAAACAATGTGGGGAGTTGATTAATTTTTTGGACGGAGTATGTCAAGGTGAGCCCT  
GATCAAATCAATCGCATCATTGGATGTGGTGGGTCCACGTGTAATGGTGAGGCCGAT  
GTTGGCGATAATCAAAGTGAAGATGATGATGATGATGAAAATACTAGTGATGAAAC  
TGACCATGATGATACCGATCATGATGGTGACGGTGGGGAAGGGGGGGGCTTGAAAT  
TGTTCCGGGGTTTTGTTGAAGTGTCAAACAAGAAAAAGAGGGGCCGTGATGAGAAA  
ATGGGGCTTGGGGGGGCCCGTGCAAAGGAAATCAAGATCTGTAAT **TGA**AGAAATCG  
GTGGTGTGCATGGTCAAGGAACGTGCGCGCCCGCGCCCGCCTGAAGCTGATCGTTTT  
TAGCCGTAAAAGGAGTAGACAGAAGGATCTACTTCACTGTTATTACAATAGAAGTA  
GTAGTCTGTGGTTGTAATTGTGATTAGTGTAATAATAAGGATGGAATGGTAATGTGT

AATCTAGGTGGGGGTTGAAGACCGAAGGCAAATGGGTCTGCAACCCCATCTTCTCTT  
CTTTCAAGTTTGCCTGCGAAGATGGATTTTGTCTCTACATAACCTAATTCCTTTGT  
GATTAAGTGTGCTGCATCAATGATTTGATTGTTAGTTTTATTGTTCTTCTGAGAAAT  
TAATGTTATTGCTCCAATAAGGAGTTAGAAGAATAAGAAGAAGGAGATCAAATT  
ACGATGATGTAAGGGATTGGGGCCGTCGCTGGCAAAACGAAGATGGCGTGAAGGAG  
ATGACAAG

Potri.007G070900.1 (NF-YC family)

CCATGGACCAATCACAACAAACCCGACAGCAACAGTCACAGCAGCAACCTGTAGTA  
GCTGGTGCAGGTCAGATGGCCTATGCTTCTACCCCTACCAAATGCTCCAATGGTG  
GCTTCTGGGACTCCTTCCATAGCCATCCCCTCCCCAACTCAGTCTCCAGCCACCTTCT  
CTAATTCACCACCAACTTACATACCAGCAGGCCAACATTTCCACCACCAACAGC  
AGCAGCAGCAACAACAGCAGCTTCAGATGTTTTGGACCATCCAAATGCAGGAAATT  
GAACAAACAACACTGACTTCAAGAACCATAGCCTTCCACTTGCTCGGATTAAGAAGAT  
AATGAAAGCTGATGAAGATGTTCCGATGATTTCCAGCAGAGGCTCCTGTTATTTTTGC  
TAAAGCGTGTGAAATGTTTCATCTTGGAGCTCACCTTGGCGCTTGGATCCATACTGA  
AGAGAACAAAAGAAGGACGCTACAGAAGAATGATATTGCAGCTGCAATTTCCAGGA  
CCGATGTTTTGATTTCTTAGTTGATATTATCCAAGAGATGAGTTGAAAGAGGAGG  
GTCTTGGGGTCACTAAGGCAACTATTCCTGTTGGCCCTCCAGCTGATCTTCCATACTA  
TTATGTTCCCTCAGCATCCTGTAGGACCTCCAGGGATGATCATGGGAAAGCCAGTTGA  
TCAAGCAGCTGCCTATGAAGCCCAGCAGCCACAACCTCCAGTGGCACTCATGCCAT  
GGCTGCAGACTCAACCTCAACAGCAGCAAAGCGACCCTTGATGTCCAGGA

Potri.008G018400.2 (bZIP family)

GCGGGAAGATAGAATAATGGGAACCTTATGATTCTTATCGTTTTGGATTTTAGAAAAT  
TTAAAAGAAAAATCTTTGTATTGCAGGATTTTAAAGGGTGATATGAGCCAAGAAAG  
AATACAGAAAAAGAATAGGAATCAAACATTCGTAGTCAAATCCTATATTTAATGG  
TGATGGTAATGAACTCATTTAAAGACAATTTACTCTTGATTTCTCACTGAAGGGAAT  
CTGTACTGTAAGTTGTAACCCTCCCTTTGCTGCAAGCCACGATGTTTCATCACTTATGT  
CTTCTGTTATTATTATTGCAATGGATTGGCATTAGGCAACAAAAGTTGGTGTTTGT  
TTTGAACAATGAATGGGTTGCAAAAAGAAGAATTTATTTTTTTTGTCTTCCGGGACTT  
TTATTTGAAATTTGTGGAGCAAAGGACTTTGCTTTTTGGCAGATCTTGGTTACTGCCT  
ATCTTTTCCCTCTTTGTTTTGATTCTTTTACAAGCTCTATAAATCTTTTCTAATTATA  
AAGTTTTCTACCAATAAGGTAGGTTAGGATGCTGTAAGAGACATGACACTAAAGTTG  
CTGAATGGGGGACATGTTGTGTTGTTTTCTTTCCTTTAGAGGTGCATGCAATACAGG  
CCTAAGAATGGATATCTGTGAGAGTTGAAGCTTGAAAAACCCTGTTATTGGTTTTC  
ACCATGCAAGGCAATCCCTACTTCCTCCTCGCTGCCCATTTCCGGAAGCATGTCGTTT  
CTCATCCAATTCACGAATCCAGTCCGCAACACCATAGATCTCCCTCCCAAGGTTCCAG  
TTCTGGAGGAGAAGCCAGCATGGCTTGATGATTTGTTAAGTGATGAAGATGCAGATT  
CAAAAGGAAAGTGTCTTCGCCGGTCCGCCAGTGATTCGGTCACCCTCTTGGATGGTA

TCGTGGATTCAATTTTCAGGTTTGAGTCCATATAATGATGAAGCTGCTTCAGGTGGCA  
ATGAAACTTGTAGTGGACTGGAGTCAGCTTCTATGTATGGTCCTAATTCTCCTAGGA  
GAAGAGGGAATGTGACCTTCTCGGAAAATGCCATAGCATCAGCACTATCGGAGTAT  
GCATTTCAAATCCTTTGCAGTATGTAGATGGCAGCCTGTGCATTTTCGGGGATTAAA  
CCCTTGGATCAAATGGGGAATGCATGTGGTTCAGCTGGGGAGCTCAATGGCGAGAC  
AAACCCTGTGAAACGGCATTCTGGGCAACGCTCAAGAGTTCGTAAACTCCAGTATAT  
TGCTGAACTTGAAAGAACTGTTAATGTTCTGCAGACTTTGGAGTCAGAGTTGGCTGT  
CAAGTTGCTTCTATGCTTCAGAAACGTGCTACCTTGTCCCTGGAAAACAACACATT  
AAAGCAACAGGAGGCCAGAATACGGCAGGAAAAATTGATCGCAGAGGCTCAACAT  
AAGGCTTTGAAGAAGGAAGCTGAGAGAATGAAAAACAAGTTAGGTTTCACAAATTT  
GAAGTTCAGAAATTATTCCAGATCAAGTCGCCCTCCGGAGGCAGCTAGATCAGAAG  
TTACATGGCAGATGGCAAACCTTAATCTTAAC TAGTCAGGGGAGTCCTTGTCCATGC  
TTCAACAATACGTCTCAAACATGATTTTCTACTCATCAGTGTCAATTTTGTGAAAAAA  
GTAGACAGCCTTGCTGCATCATGTCATAAACTGGTTAGGATACCTTGCCTCCAGG  
GCACAAGTTGTTTATATCTTGCTGTACATGAACCGCCAGTGAAGTACTGACTTGTATAAC  
AGGGAGTGGCATCATCTTTTCACCATAATTATCTTTGCATCCATGCACGGGTTACAA  
TCTCGTG

Potri.008G064200.1 (MYB family)

GATTCCCTGTACATAATTCTTAGATTTATTTAAAAACCTCAATCTTCGCATATACTCT  
CCGTTTCTTTCTTCTTCTCCCTGCTCTACATCTCTCGATTCCAATCATATTCCTTCT  
CGATGCAGTACGAACCCGCAAGCAATCGCTGCATATTAAGTGATGATAGCTAGGT A  
TG GAAACTCTATATTCATCTTGGAGCATGTCGAATCCAATTTGTGTTGCCCAAACCA  
CAGAGTGGACCAAAGAGGAGAACAAGATGTTTGAGAGAGCTTTGGCGATATTTGAT  
GAGCATGAGCCTGATAGATGGCTGAAGGTGGCAGCTATGATACCAGGAAAGACAGT  
TAATGATGTGATCAAGCAATACAAGAAGCTGGAAGAGGATGTTTGTGATATAGAAG  
CAGGGAGGGTTCCGGTTCCAGGTTATCTTAGCTCATCTTTCACGTCCGAGTTGGTTG  
AT A ATAGCACTTTTGTATGCGTATAGGAAGAGGCCTTTGAATATCAAGAGTGCTGATC  
AGCAGAGAAAGAAAGGTGTGCCATGGACAGAAGAGGAGCACAGGCGGTTCCCTGAT  
GGGGCTTCTAAAGCATGGCAAAGGAGACTGGAGGAACATCTCTCGCAATTTTGTAG  
GCTCCAAGACTCCAACTCAAGTGGCAAGCCATGCACAGAAGTATTTTATAAGGCAG  
CAGCTTTCGGGAGTGAAGGATAAGAGAAGACCAAGCATCCATGACATCACAACCTCT  
CAATCTCGCGGGTTCTACTTCTCCATCAGATGGTGACAAAGCTTCCCTCACTTGATCA  
ATCTGACGTGCTATTACCACAGCAAAAGCCGGCAGGGATGCAGAAATTGTTG A TTG  
ACTGGGACGAATCAAAGGATGGATCTGTTATGACCTTTGGTTCTACTCATGGAGACT  
TGTTTGAGTCATCTCCATA C GAGATATCTTCAAATGGTCTAACATTTCAAGGGCAA  
ATCTGTATGCTGGTGTCTCGTCACGGGGCTCGTATCAAGCCCCGTAAGTTGGTCTTTCA  
ATTGTCACCCCAAGATTTCAAATTCAT TGA TAGGGCGGCGCTTTTGTGTATACAT

TGATGGAAAAACAAATCTGGTTTAGGGTCAATCGAATCTGGATAGCAGTGCTTTTGC  
CATGGTCATGTGT

Potri.008G113400.1 (bZIP family)

GAAATTGGCCACCTCATTAGCCTTTTCTCAACTATAAAACCCCTCCAATCCTCATG  
ATGTTCTCATTACCACAATATCCGATTACAAACCCTTGAAGTATCTTCTCAAGAATT  
CTAGCCATGCTTCCAGGCGAGCTCACAGGAATTCATATATAGCACCTGATCAAAGC  
CTGATTCCTTTCCCGGCTAATTTCCGGCATGATGCAACAAAGCAGCATACCAGCCTTC  
CATTTCAACAGACTCTTGAACAACCTTGCAGAGCTCATCGTTCCCGCAACCGGTTTCGT  
GAATTCACTCCACAGTCCTCAAGTCTCAGCAACAACCTCAACTTCAGATGAATCTGAG  
GAGCACCAACTCAGCATCATCGACGAGAGGAAGCAACGGAGAATGATTTCCAATAG  
AGAATCTGCTCGCAGGTCAAGGATGAGGAAACAGAAGCACCTAGATGAGCTATGGA  
CTCAGGTAGTTCGGCTGCGAACTGAGAACCACAATCTGATAGACAAGCTGAATCAT  
GTGTCTGAGTGTCATGACCGGGTTCTTCAAGAGAATGCACGGCTCAAAAAGAAGC  
TTCTGATCTTCGCCAAATGATTACTGACCTGCAAATTGGCAGCCCTTACACTGCCACT  
GCTTTAAGAGATCTTGAAGAGGTCCCCTGCAACACAGCCCATGTCAGAGCTGAATCC  
TCAAACCAATCTGTCACTAGTTCTGTAGACTTGCTTCATTTGAACAAGAGATCTTTT  
GCCATTATAATAGCTACTTCATGTTCCCTTCTGTTTGAGATGATTATCGATGTTAACTT  
TAGCTTCCATCTGCAATAACAGCTTTCTAACCATTCCCCTCCTTGGCTTCATTATCAT  
CCTGCACATTCCTTAAAACAATCAATTCCTTTTATATTACTTACAATCAATCTTCTTG  
CCGCGTATGCATTAGTGCAACCAGCAAACA

Potri.009G004800.1 (C2H2 family)

CCCTTCTTTGTTAGGTACCTGTGCATATCACATCTCTCATGCTATATCTCACACAAG  
GTCTTTGATGATGGATATGGAAGCTCAAGATGAGTTCATGGGGTCTAATGATCTTAC  
TCAGATCGTTAAAGGCAAACGCACCAAGCGGCAAAGGTCATCTTCCCACACAAGG  
TGGCGACCTCTTGCTCATCAAGTGGCTATGGTGGTGGTGGGGGAGAAAGAGGAGTG  
CTTATAGAGGAGTATGGTTCAATTTCTCTCTCAACTTCTAGTGAGGTTTGTGAGA  
GCACAGAAGAAGAAGATATGGCTAATTGCTTGATTCTGCTAGCACAAAGGTGAC  
GTCCCTCCAAAGCAAATTCATGAAAATAAAGGCAGTAAAGTTGAGAAATTTAGTGC  
TCGAAAATTCTCAGATATGTCCGCACCAACCATTAACAAGGCCGGTTTCTTTGTATA  
CGAGTGCAAAACCTGTAACCGTTGTTTCCCATCATTCCAAGCATTAGGTGGGCACAG  
AGCCAGTCACAAAAGGCCTAAGGCCACAGCACCGGAAGAGAAAAAGGTCTTGTG  
GTGGCATCAATGGAGGATCTTGACGATCGTCAATTGAATAAAAGGAGTCCTTATCCT  
TGTCTTTCTCTCCAAATACCAACAACAACGTTAACAAGGGTTTTTCAGGCTAAC  
AAGGCTAAGATTCATGAGTGCTCAATTTGTGGCTCGGAGTTCATGTCAGGTCAAGCT  
CTTGGAGGTCACATGAGAAGGCATAGGGCCAACACAGGCGCCAACCAAGTGAGCA  
ATATCAGTACTGATTCATCAAGTGCCACCACTGAGTCTAAAATTCATGGTGATCACC  
ATCATAAGATCAAGCCACGAAATATGTTGGCTTTGGATCTTAATCTACCAGCTCCTC  
CTGAGGATGATCATCACCTCCGCGAATCCAAATTCCAATTATCGTCAACACAACAAC

CACTAGTGTTCTCCTCCCCAGCCTTAGTGGATTGCCATTAC**TAG**AAAAATACTAAAA  
AAGATCCATATGGATCAATGTGAATTAATTTAATTGTATCATTGCTATAATTTACTA  
GAATTCATTACTATCCAAATTCCTTTCTTGTTGGATTTTATGGCAACATAT

Potri.009G014800.1 (ARF family)

**ATG**AAAGAGACAGAGAAGAAGAGCTTGGATCCACA ACTATGGCAAGCCTGTGCAGG  
AAGCATGGTTCATATCCCTCCACTCAACAGTACAGTCTTTTATTTTCCACAAGGTCAT  
GCCGAGCACTCTCAATCCCCTGTCAATTTCCCTCAAAGAATCCCTTCACTCATCCTCT  
GCCGTGTTGCCACTGTCAAATTCCTTGCCGACCCTGACACCGATGAGGTCTACGCCA  
AGATCGGCTTCGTCCCTTTACCAAACACCGACCTTGATTTTCGCTCATGATAGGGGAC  
TATGTGGTAATGGGAACGACGGTGACAGCTGCCAGACAAGCCGGCCTCTTTTGCA  
AAGACACTAACTCAATCTGATGCTAACAAATGGTGGGGGTTTCTCTGTGCCTAGATAC  
TGTGCAGAGACGATTTTTTCCAAGGCTGGATTACTCTTCGGATCCTCCCTTGCAGACT  
GTGAT**C**GCTAAAGATGTGCACGGTGAGGTGTGGAAGTTCAGGCATATTTATAGAGG  
GACACCAAGGAGGCATTTGTTGACTACTGGATGGAGCACTTTTGTTAACCAGAAGA  
AATTGGTTGCTGGGGATTCAATTGTGTTCTTGAGGGCTGAAAATGGCGATCTTCGTG  
TTGGAATTCGCCGCTCCAAGAGGGGGATTGGAATTGGAAGTAGACCTGAATCATCA  
TAACTACTGGGTGGAATTCACAACAATGCTACCTGTGCTATACCATATGATGGATTT  
TCACTTTTTGTCAAGGAAGATGAGATGCGAAATGGGGGAATGAAGGGAAGGGGGAG  
GGTGAAGCCTGAAGAGGTTTTGGAGGCTGCTGGTCTAGCTGCTAATGGAAAGCCTTT  
TCAAGTCGTTTATTATCCGCGATCAAGCACCCAGAGTTTTGTGTCAAGGCCTCTTCA  
GTGAGGGCAGCAATGAGGATCGGTTGGTGTCTCTGGGATGAGGTTCAAGATGGCTTTT  
GAAACTGAGGACTCTTCACGGATTAGCTGGTTTATGGGGACTGTTACCTCTGTTTCAG  
GTTGCTGATCCCGTCCGATGGCCTAATTCCTCATGGCGGCTACTCCAGGTGGCATGG  
GATGAGCCAGATTTGCTACAAAATGTAAAGCGTGTGACCCCATGGCTGGTTGAATTG  
GTGTCAAATATGCCAGTTATCCACCTGTCACCCTTCTCACCACCAAGAAAGAAGTCG  
CGATTCCCACAACAGTTAGGCTTTCCACTTGACCTCCAATTTCAATTGCCATCATTTT  
CAGGCAACCCCTTGGGCCAGCAGCCCATGTGTTGTCTATCCGATAAACTCCTG  
CAGGCATACAGGGAGCCAGGCATGCTCAATTTGGAATTTCAATTATCTGATATCCAGT  
TTAACAACAAACAGCAGTCAGGGATGTTTCTATCCAGTCTCCAGCGGTTCAATCCAC  
ATTCTAGAAATTCTGAAACTTACCTGACAGGTCACACAAACAGCAATGAGAATATAT  
CTTGCTTGTTAACAATGGGGAACAGCAACCCAAATTTGGAGAAATCTGATAATGTAA  
AGAAACACCAGTTTCTACTCTTTGGTCAACCAATACTTATTGAGCAGCATATATCTC  
ATAGCTGTTCAACTGATGCAGTCTCTCAAGTTATTAATGAGAGAAATTCATCTGACG  
AGTCTTCCAGCAAGGAAAAAATTTCTGATGTATTACTGTCTGCACCTGGGAAAAAGA  
TTTACAAGTAAAGTCGTGCGGTAAGGTTTTTTCATGGCACCAGAGTCTTCATAATA  
CCAGTGAAATTGGCAAAGATACTGGTCCCTGCAAGGATTTTTTGGAGTCAGAGGATG  
TGGGATGGACCCTCGATCTCTCTGCTCTTTGTTCTTACGAGGAGCTACATGGAAAAC  
TGGCCAACATGTTTGGTATAGAGAGATCAGAAATGTGCGAGCCATGTGCTCTACCGAG  
ATGCGACAGGTTCTGTTAAACAGATTGGAGATGAACCATTCAAGTGTTTTTATGAAAA

CTGCAAAAAGATTGACAATTTTGATGAACCAACCTAGCACAGAAAGTTGGGAGGAG  
ATGGATCACAGGGATGCGAAATGCTGA

Potri.009G018500.1 (bZIP family)

GGGGAGTTGTTTAGTGATATCGGGTTTTGCTTCCTTTTTATTTTTATTGTGGAGATGA  
GCCCTGATATCTTGTTTCGTTTCTAAAGCAAACGTGGTTAGGGTTAAGAGTTTGGTG  
GTGAATGGTGTTCAAACAATGGCATCTCAAAGAAATGGCCAGCAGTCTCATCTAC  
AGCCGTATCGTTGACGAGGCAAACTCGTGGTATAACCTCACTCTCAATGAAGTTG  
AAAACCAATTAGGAAATTTAGGGAAGCCCTTGTGTAGCATGAACCTTGACGAGCTTC  
TAAAAATGTATGGAGCACTGAAGCTCATCAATCCGTGGGAATGGATAGTGAAAGT  
ACCTCAATGTCTTCTCTCCAACATCAGGCTAGTCTCACATTGGCCAGGGCATTGAGT  
GGGAAGACAGTGGATCAAGTCTGGAAAGAGATTCAACAAGGGCAGGAGAAGAGGT  
TTGGTGAGGAGATGAAAGTTCAGGAAAGAGAGCAGACTCTTGGTGAAATGACTTTG  
GAGGATTTCTTGGTACAAGCAGGACTTTTTGCCAAAGCAACTATAAGCCCTTCTTTG  
GATTTAGTTACTGTTGATGCAGTGACCCACAAAGTTTTTCACAGAAAATGGTCCTT  
TCCTCATCCCCGTCACAAGCACATTATCTGATACTACGACATCAGGACGGAAAAG  
GGATACCCAGATGCATTTGAGAAGAGTATTGAGAGGAAGCTCAAGAGAAAAATCA  
AGAACAGGGAATCTGCTGCCCGTTCACGAGCTAGAAAACAGGCCTATCATAACGAG  
CTGGTGAGCAAGATTTACATTTAGGGGAGGAGAATATAAAGCTCAAGAAAGAGAA  
GGAATTTGAGAAGAAGTTTCCAATTGAACCATCAGCTGAACAAAATATCAGCTTA  
GAAGAACAAGTTCTACTTCTTCTGACATCACATCTCTGTGTGAGAGTTTTGTAGC  
TCATCGAGTGTTCTGTGCTAGGCTCATCGAGTGTTCTGTGCTAGGCTCATCGAGTGTT  
GTGCTAGGCTCATCGAGTGTTCTG

Potri.009G027300.3 (MYB family)

GTGGGTGGACTAAAGGTCGGAGAGAGACAGAGAGAAAAAGCAAAGGAGAGAAA  
AATGAAAATGATGCAAGACGAAACCCGAAAGGGTCCATGGACAGAACAGGAGGAC  
ATTCTACTGATCAACTTCGTGAACTTATTTGGTGATCGACGATGGGATTTTATAGCA  
AAAGTATCAGGTTTGAAGGTGGCGGGAGACAAATATAGGTATGCATATATGGCGAT  
GGGTGGTTTTGTAAAGGAACCACCTTTAACCACCTGGTTTTGTTGTAGGTTTGAACA  
GAACAGGAAAAAGTTGCAGGTTGCGATGGGTTAATTATCTCCACCCTGGTCTTAAAA  
GAGGAAAGATGACACCTCAAGAAGAAAGACTCGTCCTGGAACCTCACGCCAGATGG  
GGAAATAGGTGGTCAAGAATTGCTCGCAAATTACCTGGGCGAACTGATAATGAAAT  
AAAGAACTATTGGAGGACTCATAACGCGGAAGAAGGCTCAAGAAAGGAAAAGCGTC  
GTGTCCCTTCACTGTCATCTTCAAACCTGTTCTTCTCATCAAATATCACTACAGTGA  
ATTCATCATCTCCTCCAGGAACTGGAGAAGCAAGTTTTTACGACACAGGGGGGCTTG  
ACAAGTTGCTTCAGCAGGAAAAACGGAGAGGCAGTGCAAGGGGGTGAAAAGGG  
ATACTCGATGGATGACATATGGAGAGACATTGAAAACACTATTGAACCAGTTTGTG  
ATGGGTTTAGTGAAGAAGGTTGCAATTTTTCTTATCCTTCGTTGGCTTCTCCATCGTG  
GGAATATCGCCCGGACATACTTTGGAGCATTCTGGAGAAGAGAGCAAGATGTTTCT



CCCTTACGACGACGGCACAATGCTTTTGACAGGC**TAA**TCAGAAATTCTTTATTTAAA  
TTTGTCCATATATGTGATATTTCTCCGAGGAAACTCTAACCTGTATAGTATGAGTTTT  
CTCCAAGCTATCTTATGTATAACCTG

Potri.009G060600.3 (NF-YA family)

GGACCGAAATCAATGACTTTCCTATAGATTCTCCAAAATTCAAGCTCCTTTAGGGT  
TTCCAATTTCA**CAG**AACGTTGTGA**ATG**ATGCCGGCAAATCTGAAAAAGAAGA  
TCGACGTTTAGACCACAGTGGACCGAGCCCGTTCCAAACAAACATTTACTCGCAACC  
TTGGTGGCGTGATGTGGGGAACAGT**T**CCTCTTTAGGTGACACTGCATCAAAATTGTC  
TTCAGTAGAGCACCTAAATGGTTCTCTTGGCAATGCAGCAATACAATCACAAGTTAA  
TACTGGCTTACAGAAAGGAGCTATGGTGAACAAAGACATGCAGACCGATGTAACAT  
CGCAATCTGATGAAAGTAATGAACAAGAACACCATCTCAAACACATTCCATCACCA  
ACAACTGTTACCATGGGCGGACACCTTGAACCAAATTCCCAGATGGAACTTGTGGC  
CACTCAATTGTTTTGACTTCACATCCATATACAGATCCACAGTATGGCGGGATGTTT  
GCTTCTTATGGAGCACAAGCTATGGTACCTCAATTATATGGAATGCCACACGCCAGA  
ATGCCCTTGCCCTTCAAATGGAAGAGGAGCCTGTTTATGTAAATGCAAAACAGTTT  
CATGGTATTATGAGGCGAAGACAGGCACGTGCTAAGGCAGAGCTTGAAAAAAGGC  
AGTAAAAGTTAGAAAGCCATATCTACATGAGTCTCGACACCAACATGCTTTGAGAA  
GGGCAAGAGGTTGTGGTGGCCGTTTTCTCAATACAAAGAAGCTTGATAACAGCGCT  
ACCAATCCCACATCAGAAAAGGGTAGTGGAGATTTGAATTCCTCTGGCGATCTGGA  
AGAAGGAAAAGGGTCACAGGCTTCCTCCAATGGTCATGGTAATGGCCATGCACTCT  
CATCAAGATATCATTATCATCACATGATGGCAGCTTCTTGGGTCAGCAAAAGGAAA  
CCACACACGGGAATAGGGTGTCTAATGGAGCTGTCTCCATTCAT**TAA**ACTTCCACCT  
CGAGTTG(**Deletion:TACGGGGCCTTCAGCATTGCTACATTGG**)AAAAGCTGGAGGCAT  
TAGCCATGTTCAACTTGGGAGGAAACCTTTCCTGTGCTGTGTTTCTCAGGCAATTCAT  
TCTTGGCTTTAGGTCTTTGGTACTTGGTGCATTTCATGGTGGTGAGAGTGTAGTATAT  
GTGATGGACTTCA**C**GCTGTCTTCAGACTTGAACAAATTCATCTCTCTTTTAGTC  
GCTTCTGTA AAAAATGGCAAAAACCTTGTGTATCTACCTCGTAGAAATTA

Potri.009G068000.1 (HSF family)

AAACACATTGGACTTGCAGTTGTGAATATTGAGGGTAAAAATTGTACTTGTAGAAGT  
GCATATCATCTGCTTCTCTAGTTTAATTCCCAGCTGATA**ATG**GCATTTACAGTGGAT  
AGGTGTGAAGAGATGGTGTACTGTGGAGTCTCAAAGGCAGTTCCTGCACCCTTC  
TTAACAAAACTTACCAGCTAGTTGATGACCCTCTTACAGACCACGTTGTCTCTTGG  
GGTGTGATGAAACCACCTTTGTTGTGTGGAGACCTCCTGAGTTTGCTAGGGAACTC  
CTCCCAATTACTTCAAGCACAACTTCTCAAGCTTTGTCAGGCAGCTCAACACC  
TACGGATTCAAGAAGGTAGTAACCTGACAGGTGGGAGTTTGCAAATGAGTACTTCAG  
AAAAGGAGCAAAGCAGTTGCTATCTGAGATTACAGGAGAAAAACAATATCCAGC  
ACCATCACCAACTACCCTGACCAAGCAACCCAATTTCTCCAATCAGAAGATCATG

GTTTTGGTTGGATTGATCCTCCATTTCCATCTCCAAAACCAAATGTTGATCATATCCT  
AACTGCCCTCTCAGAAGACAACCAGCAACTGAGAAGGAAAACTGTATGCTTTTAT  
CAGAACTCTCCACATGAAGAATCTCTATAATGACATTATCTACTTCATCCAAAACC  
ATGTAACCAGTGCCCAATGAGCAAAAAGCTTACAATACAGTACCCAAGCTTATA  
GAGCCGGTTCTTCATGTCAAGATCAAACCATTTGTTTTGGCGTTCAAAGGGCTAAG  
AATGGTGTTTTGGGTAAGCATTCAATTAACATTTAGTACTGAGGAATCATCTAGTCCA  
GTGAAGCTTTTTGGAGTCCCTCTCATTGATAACAAAAGGCTGCATCCAGAAGCGATT  
GAATAGCAGGAATGATATTGTAGTGTCTCCTTAATTAGCTTCTACAATAGGATCTA  
GATGTTGTCAGTAAGAGTTATCAGAAGAGGAGCTACATATGTACACAAGTAGCTGA  
AAGTTCAGTTGGATTTAAGCCACTTCATGTTAATTAGCAGCAAAATTAAGAAATTTCT  
TCTTTTTCTTTCTTTTCTTTTTTCCCTCACAGATCTGAAGCAAATAT

Potri.009G134000.1 (MYB family)

GACCCACCAAAAATATCCTACTGAAATGGGAAGGTCTCCTTGCTGTGAAAAAGCCC  
ATACAAACAAGGGTGCCTGGACCAAGGAGGAAGACGATCGCCTTGTTGCTTACATT  
AGAGCTCACGGTGAAGGTTGCTGGCGCTCACTTCCCTAAAGCCGCTGGCCTTCTTAGA  
TGTGGCAAGAGTTGCAGACTTCGTTGGATCAACTATTTAAGACCTGACCTTAAACGT  
GGCAATTTACCGAAGCAGAAGATGAGCTCATTATCAAACCTCCATAGCCTCCTTGGAA  
ACAAATGGTCACTCATAGCTGGAAGATTACCAGGGAGAACAGATAATGAGATAAA  
GAATTATTGGAACACACATATAAGAAGGAAGCTTTTGAACAGAGGCATAGATCCCG  
CAACTCATAGGCCACTCAACGAACCAGCAGTACAAGAAGCCACAACAATATCT  
TTCACCACGACTACTTTCAGTACTTGAAGAAGAGTCTCTGGGTTCTATAATTTAAA  
GAGGAAAATAAAGAGAAGATAATTAGCGCAACTGCTTTCGTATGCAAAGAAGAGAA  
AACCCAAGTTCAAGAAAGGTGTCCAGACTTGAATCTCGAGCTTGGAATTAGCCTTCC  
TTCCCAAACCAGCCTGATCATCACCAGCCATTCAAACCTGGAGGAAGTAGAAGTC  
TTTGTTTTGCTTGCAGTTTGGGGCTACAAAACAGCAAGGATTGCAGCTGCAATGTTA  
TTGTGAGCACTGTTGGGAGCAGTGGCAGCACTAGCACAAAGACTGGTTATGACTTCT  
TGGGCATGAAAAGTGGTGTTTTGGATTATAGAAGTTTAGAGATGAAAATAA

Potri.010G004300.1 (MYB family)

GAAACACAAGCCTATTAAGATCCCAAGGCTTTGCTTCTTCTGAGTTCTGACAGACCA  
TTCTTCAACTAGAAATTAAGCTTAATTTCTTCTTCAAATGGGAGGCAATCTTGCGGT  
TACAAGCAGAACTAAGAAAAGGGTTGTGGTCCCCGGACGAAGATGAGAAGCTTTT  
GAGGTACATTACCGAGCATGGACATGGATGCTGGAGCTCCGTCCCCAAGCTTGCAG  
GTCTTGAAAGGTGCGGAAAGAGTTGCAGGCTGAGGTGGATCAATTAAGACCA  
GACTTGAAGAGAACCAGATTCTCAAGCCAGGAAGAGAACCTCGTAATCCAACCTCA  
GTCAGTTCTAGGCAACAGGTGGTCTCGAATTGCAGCACAGTTACCAGGAAGAACGG  
ACAATGAGATAAAGAATCTATGGAACCTTCCATTAAGAAGAACTCATGCAGAAA  
GGTATTGACCCCAACACCCACAAGCCACTCTCTGAGGTTAAGCTTTCTACTAGCAAG  
TGCCCTGAGAAGGCCTCAAGAGAACTGGATACAGCGATCTCACTCAATCTCAAGGC

AGATAGTTCAAAGCCATCACTCATTGATGTATCGAGCTGTAAGATTGAAAAAGGAG  
ATGACAATTTGAATGCCTCCAAAACCAGTGCCCACCAGGAATTCTTCCCAGACAAGT  
CTTTGCCATTCAATCGATACCCCAACATCCAGCACAGCCCTTTAGATTCAATTGCTTA  
CCTGCAATTTCCAGTCCAGCAGTTGAATCATGAGCAATTAGAGCTTGACCAGAAGTG  
CAGTCTTTTTGAGCCAAACCAAGAACTCAACTCCAGAACACTAGTACCCACGATTTC  
AAGGTCAATCTTATCTGCTCAAATGGACAATAAAATCCATGCAGGTCTTCCCTTTCA  
CTCAATGGGCACATTCAATAACATCCATTGGGATTCAAGTAATTGCAGCAGCGAAA  
GTAGTGAGTTTCAGAAGAAGTCCTTATTCGATAGCAACGTCTTCTCATGGGGGTTGG  
CAGATGATGGTGGATCATCAGACAAGACCTTACAACCTCATTCCGCTGATGCTGAGA  
CAACAGATATCAAGTGGTCCGAATATCACAACACATCATTCTAGCCGAACACAATC  
AACAGACACTACACTCGTGAATGCAC

Potri.010G186700.1 (bHLH family)

ATGGAAGATCACTATTCTCCTTGCTGGCCTGCTGCTCCTGCAGAGGCCAAACTGGGAT  
CAAACAAGTGCTGCAGTATATGATGAGTCCTTTTTAGTCCCATGCCATCTCATGCTT  
CTGCCTCTGCCAACTTTCAAGTATACGGATTCCCTTCGTGGTCAGTACCGCTTCAGGA  
GGCTTCAGAAGATAAAGCTGCTTCGAGTTCCAAGAGTCATAGCCAAGCTGAGAAGC  
GGCGACGGGACAGGATTAATGCACAACCTGGGAATTCTTAGGAACTCGTTCCTAAA  
TCAGAAAAGATGGACAAGGCAGCTCTCCTAGGAAGTGCGATTGATCATGTGAAGGA  
TCTCAAACAAAAGCAACGGAAATCAGCAGAACTTTCACAATCCCAACTGAAGTTG  
ATGAAGTGACGGTTGATTGTGATGTTTCTCAAGTTACAAGCCCTCCAGCACCAACA  
AAGACAAGGACAACACATTTATCAGGGCATCTGTTTGCTGCGATGATCGGCCAGAA  
CTGTTTTCGGAGCTTATTACGGTGCTCAAAGGCCTTAGACTAACCATAGTTAGAGCT  
GATATTGCTAGTGTAGGTGGAAGAGTTAAGAGCATATTAGTACTTTGCAGTGAGTGC  
AGTGAAGAGGGGAGTGTTTCAATTAGCACTATTAACAGTCGCTTAATCTAGTTTTG  
AGTAGAATCGCTTCATCATCAGTGCCATCAAATTATCGTATTAGAAGCAAGAGGCCAA  
AGGTTCTTTTTGCCTTCTCATTGTGTCAGAACAATATGAAATAA

Potri.010G188700.1 (NF-X1 family)

ATGTCCTCCGCCCTTGGCTACCACCATCACCACCACCTACAACAAGAACAACAACAA  
CAACAACAGAAACCCTTCTCCGACTCCGATTCTACTCCGACTCCGACTCCGACACC  
ACCAACAGCCAAAACCAACACTCCGCAGATCTCACAACTCAATCTTCAAATCCTAC  
TTCGAACACGCCAACCACCAATCCTTACAACCAACGCAACACGACCTAACCAAAAT  
CAAATCCTTCCTAACCTCCTCCTCCTCTGGCGCTCTATCATGTCTCATCTGTCTCGAA  
CGCATCAAAACCTCCGATCCGACCTGGTCTTGCACCTTCTCTCTGCTACGCCGTTTTCC  
ACCTTATCTGTATCCAATCCTGGGCTCGCCAAGCCTCCGATCTCTCCGCTCTTCGAGC  
CTCCACGCGCCTCCCTATCTCCTCTGATAAAGCCGCTGAATCCTCCACCTGGAATTG  
CCCTAAATGCCGCTCTGATTATTCTAGATCTAAAATCCCCAGAAATTACCTCTGTTTC  
TGTGGCAAAGTCGAAAATCCACCAAATGATCCTTGGATTTTATCCCATTCTTGCGGT  
GAAATCTGTAACCGTCAGTTGAAGAATAACTGCGGTCATTGCTGTTTGTACTTTGC

CATCCCGGTCCCTGCCCATCTTGCCCGAAACTTGTCAAAGCGACATGTTTTTGCGGC  
AAAACGACGGATGTTAAGCGTTGCGGTTACAAATTATTTTCTTGTAACAATATTTGT  
AAAAAATCATTAGATTGCGGGATTCATAGCTGTAAACAAATTTGTCACGATGGACCC  
TGCCCGCCGTGTAATGCCCGCGGGGTTATAAATGTTTCATGTGGAAGGAAAGTTGAG  
GAGAGGGAGTGTTGTGAGAGAGAATTTAGATGTGAGAATCCCTGTGAGAAATTGTT  
AGCCTGCGGAAAACATGTGTGTGAGAGGGGGTGCCATTTTGGGGAGTGTGGAGATT  
GTCCTCTTCAAGGGAAGAGAGCATGTCCATGCGGGAAGAGACTCTATGAAGGAATG  
GCTTGTGATATTGTTGTGCCGCTTTGTGGTGGTACCTGTGATAAAATGTTGAGTTGTG  
GTTTCCATAGGTGCCACGAGAGATGTCATCGAGGGCCTTGCAATTGAGACTTGTGCGAA  
TTGTTGTCACCAAGTTGTGTAGGTGTGGGGGGATGAAGAAAGAGGTTCCCTTGCTATC  
AAGATTTGGCATGTGAGAGGAAGTGTCAAAGAATGAGAGATTGTGGACGACATGCT  
TGTAACGTCGCTGCTGTGATGGGGACTGTCCGCCATGTGGAGAGATTTGCGGCAAG  
AGGCTTCGGTGTAAGAATCACAAGTGTCTGCCCGTGTTCATCGAGGTGCCTGTTCT  
CCTTGTCCCTGTAATGTTTACAATTTTCATGTGCTTGTGGAGAGACTCATTTTGAGGTTT  
CCTGTGGCACTGAGAAAGACCAAAGCCTCCAAAATGTCGTAATCATGTGGAATA  
TCTCCTTTATGCCGACATGGATCAGATTCTAAGCCACACAAATGCCATTATGGGGCA  
TGCCCTCCTTGTGCGATTGCTTTGTGATGAAGAATACCCATGCAGCCATAAGTGCAA  
TTAAGGTGCCACGGCCCCAGACCACCTCCTAATCCAGATTTTCACATTGAGGCCAAAG  
AAAAAGAAACCAAATCATCAGAGTGAAAGTACACCAGGAACCCCATGCCCTCCTTG  
CCCTGAACCTGTTTGGAGGCCATGTCTTGGCCAGCACATTGGAGCAGAGAGAATGAT  
GGTCTGCTCAAACAGAACCCAATTTTCTGTGAAAATCTGTGTGGGAGCCCTCTTTC  
TTGTGGCAATCATTATTGTACAAAACTTGCCATGCACTGAAGAGCCAGTCTTCAAC  
TTCATTGGTTCAACATAAAAGAAGCGAGTCTTGTGAAGAGTGTTCATCTTCCTTGTGA  
AAAGGAACGGAAACCTGCTTGTGCGACATTCTTGCCCTCTACCATGTCATCCTGGGGA  
CTGCCCTCCTTGCAAAGTTCTTGTGAAACGATCTTGTATTGTGGTTCTATGGTCCAC  
GTTTTTGAGTGCATATATTACAATAACTTGTGAGAAAAGGAGCAAATGGCTGCTCGT  
TCATGTGGTGGATCTTGCCATAGGAAATTGCCTAATTGTACACATTTATGTCCCAAG  
ACATGTCATCCAGGTCAATGCCCATCACCTGACAAGTGCGCCAAAAAGGTCACCTGTT  
CGTTGTCAATGCCAAACCTTGAAAAAGGAGATGCCATGTCAAGAGGTTCAAGCAGC  
CTATCACAAGCAGGTTCCGATCCCAAAGATATATCTAAAAGTCATTTTGGACTTGG  
ACTTCTTCCTTGCAATTCTGGTTGCAAGAGTAAAGCACAGGTTGTGGATCAGGAATT  
GCATTTGCGTAAATCCAAAGACCTGGAGGAGAAGGTTCCAGCCACTGAAATTCATC  
CACCGAAGCGCCGAAAACGGCGTGAACATTTACAAGAAACAAAGAAGACCTCACA  
ACTGCAGAAAATTGCTGCCACCATGAAGTGGCTTCTTGTAAATAGTCACCCTTATGGT  
GACTATGGTGGCAGCTGCATATTTTCGGTTACAAAGGTCTCATTTGGCTCTCCGATTG  
GATGAATGAAGTTGAAGAGCAACAAAGACACAGAAGAAGACATCCACGAATC **TAA**

Potri.010G209400.1 (C2H2 family)

AGGATAGGCGTACCACTTACACAATTTACACAAACCATACAACTTATAAATACCACA  
CCGATATGACTCCTACATGATTCCATCTTCTAAGCAAATCCAACATCCTTTTACATT  
TGAAACCAAAGGATAACAAAACCTTATTGTTTCATATTCTTATACC **ATG**AAGAGAGG

TCTGCACGAGAGAGAGATTGATAGCATAACCATGGCTAATTGCTTGATGTTTCTATC  
TAAAGGAAGGGAATCATATTCTTTTCCTTCATTTGATCATGCCATGAGCAATATTTCT  
CCTGCTCGTGTTTTTGGAGTGCAAACATGCAATAGGCAATTCCCATCGTTTTCAAGCC  
CTAGGTGGTCACCGTGCAAGTCACAAGAAGCCAAGGTTGATGGGAGGAGAAGGGA  
GCTTCGAGACTCAATCGCCAGCAAAGCCTAAAACGCACGAGTGCTCTATTTGCGGA  
CTAGAGTTTGCTATTGGACAAGCTTTGGGTGGTCACATGAGGAGACATAGAGCTGCC  
TTGAATGATCGAAACCAGGTGGATCCTCTGAACCCTCCTAGCACTGATGATCAAAAA  
GCAGTTCCTGTGCGTGAAGAGATCTAATAGCAGGAGGGTTTTGTGTTTGGATTTGAAT  
TTGACTCCTTATGAGAATGATATGGAGTTGTTTAAGCTCGGAACGACAGCTCCTATG  
GTCAATTGTTTCTTTTAGATCTTACATGTGTAATCGCATGAAACTATACCT

Potri.010G223200.1 (ARF family)

TCCAAGATTCACAGTTCTGATCTCTACCCTTTGAAAAGCTTACGACTTTTTTGTGGC  
TTATGAAGCTCAAGTTTGTATGTTGAGGCAAAGCTAAGAGACTGTTCTTCCCAGATT  
CTACAAATCCCAAAACTACAGAGTGGTCCAATGATTAGGGAATTTGCAGTTATGAAT  
TCCCAGAAGGAAAAAATGAGAGTGGCAGAAAAATGTTTAGATTACAATTATGGCA  
TGCTTGTGCAGGTAGCATGGTTCAAATGCCAGCAGTAACTCAAAGTTTTCTACTT  
TCCACAGGGTCATGCAGAACATGCTCAAGGGAGTGTAGAATTTGGTCACTTCCAGAT  
TCCTGCACTAATCCCTTGTAAGGTATCTGCTATTAAGTACATGGCAGATCCTGAAAC  
CGATGAGGTTTATGCCAAAATTAGGCTAATCCCCTGAATAATAGCGATTTAATGCT  
TGGACATGGTTGTGGTGAAGATAATGATGATAGGTTGCACAGTGGGAATGAGTCTC  
AAGAGAAGCCTGCTTCTTTTGCTAAGACATTGACTCAATCTGATGCTAATAACGGTG  
GTGGTTTTCTCTGTGCCACGTTATTGCGCCGAGACTATATTCCAAGATTGGATTACAC  
TGCTGAGCCTCCTGTGCAGACCATTCTTGCTAAGGATGTGCACGGAGAGACCTGGAA  
GTTTAGGCATATCTATAGAGGGACGCCTCGTCGCCATTTGTTGACTACTGGATGGAG  
TAATTTTGTGAACCAAAAGAACTTGTGGCTGGGGACTCTATTGTGTTTTTGGAGAGC  
AGAGAACGGGGACCTTTGTGTTGGAATTAGACGTGCTAAGAGAGGGATTGGTGGAA  
ATGAATGCTCATCAGGGTGGAAATTCATTTGCGGGCTATTCTGGGTTTTTGGGAAG  
ATGAGAGTAAATTGATGAGGAGGAATGGCAATGGGGATATGAAGGGGAAAGTGAA  
GGCTGAGTCTGTTATTGAAGCTGCATCTCTTGACGCCAATGGGCAGCCTTTTGAAGC  
TGTCTATTATCCAAGAGCGAGTACTCCAGAATTTTGTGTAAGGCCTCAGCTGTGAG  
GAGTGCAATACAGATTCAGTGGTGTCCAGGGATGAGGTTCAAATGGCTTTTGGAGA  
CTGAGGATTCGTCTCGGATTAGCTGGTTCATGGGAATATATCTTCTGTTTCAAGTTG  
TGACCCCATCCGCTGGCCCAATTCTCCCTGGCGGCTTCTGCAGGTAGCATGGGATGA  
GCCAGATCTACTCCATAATGTAAAGCGTGTGAGCCCATGGTTGGTTGAATTGGTATC  
AAACATGCCAGCCATCCACCTATCACCTTCTCACCCCAAGAAAGAAGTTGAGACT  
TCCACAGCCCCCGGATTTTCCCTTACTTGGTCAAATCCCAATGCCGTCATTTACTGGC  
AACCTCTTAGATCGAACAGTCCCTTATGCTGTGTCTCAGATAACATTCCTGCAGGC  
ATACAGGGAGCCAGGCATGCTCAATTTGGACTATCTTCTTCGGATCTCCAATTCAAC  
AAACTGCAGGCGGGACTGTTCCCGGTTGATTTTTCAGCGGCTTGATCGTGCTGCCCT  
CCTTCTAGAATCTCCAATAGTAACTTCGTTGGCAATACTCAAACAGCGAGAGTATT

TCTTGCTTGCTGACAATGGGAAATTCCTCACAGGGTATGAAGGGCAGTGACACAAA  
GACACCCACATTTTATTGTTTGGTCAGCTTATTGTCACCGATCAGCAGAGTTCTCAA  
AGCTGCTCGGGTGATACAAATGCAAACAGTTCATCAGATGGACATCCAGGGAAGGC  
AATTCAGATGGTTCTGGTTCTGCATCACAAACAGAATGGTCCGCTGGAAAATTCTTC  
AGGTGGGAGGTGTCCTTGGTACAAAGATTACCAAAAACTGATCCTGGCCTGGAGA  
CCGGTCATTGCAAGGTGTTTCATGGAATCAGAGGATGTGGGTGCGAACCTTGACCTAT  
CAGTCCTTGGTTCATATGAAGAGCTGCACAGAAAGTTGGTTAATATGTTTGGCATTG  
AGAGCTCAGAGATGCTGAGCAATGTGCTTTACCGGAATGCAGCTGGCGCCACCAAG  
CACGCTGGAGATGAACCCTTTAGTGAGTTTTTGAAGACAGCTAGAAGGTTAACGATT  
CTTTCAGATGCAAGTAGCGACAACGTAGGAAGATAGACAACGAGGAACTTCCATCA  
AAATGTACAGTTCGCAAGTCTTTTGTGTTTGAAGAACATTTCACTTATTTTTGTCTAT  
TGGGAGCTGTGGGATAAGTCCCCTTCATCCACATTTAGGACATGTTTTCCCCTGTCT  
GTAGCACAAAT

Potri.010G223300.2 (GATA family)

CTAGCTAGCAATGAAGGAGGAGGCTCAACTACCATATAGCGCCCTTTCCTTTCCTTC  
TTCAATCACTTGCTACTAACACTATTAGTACTACCCACCCACCTCTTCCCTCCCTGTTT  
CAAACTCAAACACATATCACACATTCCCCTCTCCTCTCTTTCACCTCACTTCACTCCT  
ACCGCCCTCTTACCTCTCTCTATAAG(Deletion:AGCCAAACTGGGTTCCCTTCTCTGC  
TTTCTCAAATTTGTTGGCAATCAAATTAAGCATAAACTAAGATATTTCTCTCGAAC  
AAATTCCAAGAATTCGA)GAATTTGAAAGCACAACTTCCAAAATTCGAATAACCAA  
GAACCCCTTCCCTCCCTCCTCAAGGAAAAAGAAGTTTGAGAGAAAGTGAAGAGAA  
AATGATTGGACAAACAAATACTTCTAGTGGTTTCATGGACGAGATAGATTGTGGAA  
GCTTCTTCGACCACATCGACGACCTCCTAGACTTCCCGTCTGATGATGTCGACGCTA  
GTTTGCCTGACTGCACCACCACAAACAACCATGCTAGTTGTTTCATTGACAACGATG  
ATAACTCGTTTCCTGGTATTTGGTCGTCTCAGTCCGACTCACTCCCCGGTTCTGCCTC  
TGACCTCTCCGCCGAGTTGTCCGTTCCGTACGAAGATATTGTTTCAGCTGGAATGGCT  
ATCGAACTTTGTGGAGGATTCCCTTCTCTGGGGGAAGCCTGACAATGAAGAAAGAGG  
AGTCTGCGTCTGTGACAAAAAGGACTCGACGCCACACCACAGTTCCAGACTTCCA  
GCCAGTTTCTGTCCCTTGAGAGCAGTAGCGACTGCTCAGGAGAGAAAAATGCACCTC  
GCAGCCCTGAAATTGTTGCTTCTGGAAAATGTGGGCGTGCTCGCAGCAAGCGTCCCTC  
GCCCTGCTGCGTTCCTCCTCGCCCTGCAATGCAACTCGTTTCGCCAACATCGTTCGAT  
CACTGAGGTGCCCCAGCAATTTGTTTCTCCTAGAGTCCCTTCAGATTCTGAGAGCTTT  
GCCGAGTCAAGACTTGTGATCAAGATACCAGAGCATGTTGACCCAGAACACAAGAA  
GAAGAAGAAAATTAAGTTTATTGTTCCGTCAGGTACTGTGGAGATGAATCAAACTC  
ACAGCCACAGCAAGCAGTTAGGAAATGCATGCATTGTGAGATAACCAAGACCCAC  
AATGGAGAGCAGGACCAATGGGTCCAAAACCCTTTGCAATGCCTGCGGTGTTTCGA  
TACAAGTCGGGCCGGCTTTTCCCCGAGTACCGGCCTGCAGCCAGTCCAACCTTTGTT  
CCTTCCCTGCACTCTAATTCGCATAAGAAAGTTGTTGAGATGAGAGCAAAGGCTGGG  
GAGAAAATTACTACCAGCAGACCTGCTACAATGATGGTCAACTCGCCAGAGTTTATT  
CCAAATGAGAGCAACCCTGCAATGGATTACATGTGAGGGAGGATGTAGGGAACAGT  
GTTCTGTTGGATCATTTCACTTTGCCGGCCCCCTATTTTCACTGTCATGCTGCTCGCT  
CAC

Potri.010G240800.1 (MYB family)

AATGCATCAAGACTTTAACTTCCAACTCGGTGCTTGACTCAGCCGCCTCATGCCAC  
AGCCGCCACTCGCTGGACTCGCGAGGAAGACAAGATTTTTGAACAGGCTCTAACTAT  
TTCCCTGAGAACTTGCCAGATCGGTGGCAGAGCATTGCAAACCATATCAGAAAATC  
AGCGTGGGAAGTGAAAGAACATTATGATATCTTGGTTCACGACGTTCTTGCAATAGA  
TTCGGGCCGTGTTGAATTGCCAACTTATAGGGACGATGAATCTGTGAGTTGGGAATC  
CAGCGGCGGCGACGACGGCGGGATGGTCGCTGCGGGTGCGCCGCCGTCTGGTCAGA  
TTTGT TTTGGTGGCAAAGGAAAGCAAGATACGGAACGGAAGAAAGGCACACCATGG  
ACTGAGGATGAACACAAGCTGTTTTTGGTTGGATTGAATAAATTTGGCAAGGGTGAT  
TGGAGGAGCATCTCAAGGAATGTGGTCATTACCAGAACACCAACACAAGTAGCTAG  
CCATGCACAGAAGTACTTCCTCCGCCAGAATTCGGTGAAGAAAGAGAGGAAGAGAT  
CTAGCATTGATGACAT AACCTCAGTGGATAACAACACTGTTGGTCCTTCAGCTGATG  
ATTATTGGAAGCTCTCCGCCTGGCCCTCCAGCTAATCAAGACGGGCCACCGGGTTTGG  
GTTATCAAACCTTTAGATTTCAAATGTAA AAATGGTTAATTAGTGTAACATCATTG  
TACTACCCGCGTCTC

Potri.011G098400.1 (NF-YA family)

GCTTAGGGACTGTGGACATAACAGCCTCATGACTTCTTCGGTGCATGATCTTTCTGA  
TAATAGTGAAGCTGGTGAGCAGCAAAAACACTCAGAACCCAGGTGCAGACTTCTT  
CTCCTGCAAATGCACTGGCACACCCAGGCATCTCACCTCCAAATTTTCAGTATGCAA  
CTCCACAGCTTGGAGCAGGACATGCTATGGCACCGGCAGCTTACCCATATCCAGATC  
CTTATTATAGAAGCATCTTTGCTCCATGTGATGCCAGCCATATGCTCCACAGCCCTA  
TGGTGCACAACCGATGGTCCATCTTCAATTGATGGGAATTCAGCAAGCTGGAGTTC  
TTTGCCATCTGATGCTGTGGAGGAACCTGTGTTTGTAAATGCAAACAGTATCATGG  
TATCTTGAGACGACGGCAATCTCGTGCAAAAGCTGAATCAGAGAACAAAGCAATCA  
AGTCTCGGAAGCCATACTTGCATGAATCTCGACATCAGCATGCACTTAAAAGAGCTA  
GAGGATGTGGGGGTCGGTTTCTCAATTCAAAGAAAAAGAGAATCAACAACAGAAT  
GGCATGGCCCCAGGTGACAAATCACAATCTAATGTCAATCTTAATGCCAATAAAAAT  
GATATTGCTTCCTTGGATGACAAGTCTTGA TACTGGAAGTGAT

Potri.011G123500.1 (NAC family)

CCCATCAGAAGTGGTAACTGTCCTTATAAAAAGAAGGATCATGCCACTCAATGCAAC  
ATTTGAACCACCTCTCTAAATTGTAGCATGTTCTCAGATAATAAACCTCTAAATCAT  
CTCAGGACTCCTCAATTTCTCAAATTCGCCACTCCAGCAATTAATGGAAAGCACTGA  
TTCATCCACAGGAGGTGCCGGAGGCGGCGGCGGCTCTCAACAACCAAACCTTC  
CACCAGGGTTCCGGTTCCACCCACAGATGAAGAGCTAGTTGTTCACTACCTCAAGA  
AAAAGACCACTTCTGCTCCTCTCCCTATGGCGATTATTGCAGAAGTTGATCTTTACA  
AGTTTGATCCATGGGAATTACCAGCTAAGGCCACGTTTGGTGAACAAGAATGGTACT  
TTTTTAGTCCGAGGGACCGGAAGTACCCAAATGGAAGTGGCCAAACAGGGCAGCA

ACTTCAGGGTATTGGAAGGCTACGGGAACTGATAAGCCAATATTAACCTTTAGGTGGT  
ACACAGAAAGTTGGGGTAAAAAAGCCCTGGTCTTCTATGGTGGTAAGCCTCCTAA  
AGGGATCAAACCAATTGGATCATGCACGAATACCGGTTAGCTGATAACAAAGTCA  
AAAACAAGCCACCAGGATGTGACTTGGGAAACAAGAAAACTCCTTGAGGCTTGAT  
GATTGGGTGTTATGTCTGAATATACAAGAAAAACAACACACATAGACCAATAGATCA  
CGATAAAGATGATTATATGGATGATATTCTTGGATCAATACCGCCTTCGATACTGGT  
TGGTAACCATCAGAATGGAACACTTCATCTTGCTAAAGGCACAACTATGAGACATT  
GCTTGACAATGACCATAATTTATTCGAAGGAATAATAAGCAGCAATGATGGCATCA  
GAAGCAGCAGTTCTATGTCTCACGTGGCTTCTTCAGTATCCAAGCCAGATCACCTAC  
CCATGCTTCCACTCAAAGAACACTCCCATCACTGTATTGGACCGACGAGGACATGG  
CTGTCCCTTCATCAAGTAAGAGATTTCAAGGGGATATTAATGGAGATGAAAGTGTTG  
TGGGGAATGATGGGAATAGTTCCATAGTTACTCTTCTCAGTCAACTTCCACAGACAT  
CTCAATTGCACCAACACACAATGCTGGGGTCTATGGGAAATGGAATTTTTAGGCCAC  
CATATCAAATTCCAGGCATGAACTGGTACTCTTAAACTAATCTT

Potri.011G129500.2 (bHLH family)

CACTCACACACACAGAGAGAAAGGTCAACCGCCAACATTCCGGTTAGTTCTTTCGTT  
AGCACACCACAGGACCCAAATGGTCACTTTGGCTACCCTCCTATATACTCGAGT  
TTTGCCTGAACGGTTTTCTATCATTTTTATGTAACCATAGAAGCTTAGTAAAAGCATC  
CAAGAAATCAAGAAACAAAGCACAAGAATCTTGCGCACAACAACCACACAGAGAC  
CAGGCAGCAGTCGCTATAGTTAAGCCATGGCAGACGAGTACACAAGCACAACTGG  
TGGGATTCATCTTCATCAAGCAGGAACAGGTTTTGATAGTACTGGATCATCATCTACA  
ACTTCGGGACATACTAGTTTAGGAAGCTTTGCTTGGCCAACAGAAATGGTTGATGTC  
AAAGGAAGGTCTTCTATGGAACTGTTTCAGTCTCGGATAGTTCTGTTGTTTTCCATG  
ATTCCAGAAGCTGCAACAAGGCCATGATTCTTCTGCTGACTTGCATATGATGGGTT  
TAGGCCTCTCTTACCAGCCATTGATTGGAACCAGGCCTTACTTCGCGGAGATAAGT  
CTGAGAACAGTTTTTCGATCGATGCTACAAGATAATTTGAGTTCAAGCACAAATTATC  
AGCAAGAACTGGGATTGGATCTTCTCAAGCTCAGTGGAGATCATCAGAGAGAGTG  
TTCGCTGGGGTCAGTGGAGACTCCTCTATGAATGAGTTTAAGCAAATGAATCGGGGC  
TTTTCTTTAGATCAACCACAGTTTAGTCCTCACGGGAGCTCCAGTGATAGTACTGTG  
ACAGGTCAAGGCTTGCAGTCTAGTTTCCAATGGATTCATCAGGTATATATGGAAGC  
CCTTCAACTATGTTGCAAGGACTATTGGGATCAGATAATCAAGTACAGCAGTCTTCG  
TTCGACAACCGATCGATGGGTTATGCATATGGGGCAAATTATGGTGTTAGCACTAAT  
GAATTGTTGCCTTCTTGGTCTAAAATACCTCAATTCTTGAGAAATTCACCACCCAAA  
CAGCCTCCTCATAACCAGTTGCACCTCTCCAATAATGCTCCCTTTTGGAATGCATCTT  
CAAGTGCCATGAGTGATGTCCGTCCGAGCTTTTTCCCGTCGATGCAACCGCAGTTTA  
CCACATCCAATTTTCGATGAAAAACCTAAGAATATATCTGAAGTACGGGATTTCGAATA  
CAGCAGTAAAGAAAAGTGGGGGTGAAGCAGGAGCAAAAAGGCCAAGAAATGAAAC  
ACCATCACCTTCGCCAGCTTTTAAGGCGAGGAAAGAGAAGATGGGGGACAGAATCA  
CTGCACTCCAACAATTGGTTTCACCTTTCGGAAAGACTGATACAGCCTCGGTTCTCTC  
TGAAGCTATTGAATACATCAAATTCCTCCATGAGCAAGTCACTGTCTTGTGCACCCC



ATACATGAAAAATGGAGCTCCCATACACCACCAGCAGAGTTCTGAGAAGTCCAGGG  
ACTCTGAAGGACAAAAACAAGATCTTAGAAGCCTAGGGCTATGTTTAGTACCGGTA  
TCGAGCACTTTTCCGGTTACTCATGAGACCACAGTTGATTTTTGGACCCCCACATTTG  
GAGGGACTTTCAGAT**TAA**AAGGAAAGGACGATGGTAAAAAATTCGGGCATGGGAAC  
AGATTCTATGCAACTAGTGTATATGATCTTATCAAACCCTAGCCAAGTTGGGAATGA  
TAAGATTAACGATAGAAAAAATAAGGAACAGAAAACAAAGAAGCCCCATATTA  
GTAGTTCTGGATGGAAAAGAACA  
ACTATGTAGAGAAACTGTGAAAGAGAAAGAAAA  
GGAAATGACTCTCCAAGGGTACACGCGGCCAGCTACAAGCAAATGATATTTTTGTT  
TCGACGGCTAGAAGTATGTTAGCGCCAGTTTCTGTGTTGATCGAGATTAATCCTCT  
CTTCAGATAATCTTAAAGGCAGGCAGGCTCACTTACCATATCAGCTAGTACATTC  
AAAGAGATTTAATGCATTTCTCGGAAAGTCAAAGGATGCATATGGCCAATGTTTGGAA  
GTATCTTATTTGCT

Potri.012G127700.1 (MYB family)

GGCGTGTGAGACATGTTTCATCTCCAAATTATCATTGTTGATTTGCCCTTAAGCAAGAG  
AAATCACTAGTATATAAAGGTGGGTGAGTGGGGCTTTGTTCTCTGGGAGTAATTTGG  
TGGGAGTGATATAGCAACTAGTGACTTGCTATAGTG**ATG**GGCAGACAACCTTGTTGC  
GACAACTCGGTGTGAAGAAGGGCCCTTGGACAGCTGAGGAAGACAAGAAGTTGGT  
CAATTTTATTCTCACACATGGCCAATGTTGCTGGCGTGCTGTACCCAAGCTCGCCGG  
ACTCCGCCGGTGTGGCAAGAGCTGCCGTCTTCGCTGGACTAATTACCTCCGGCCTGA  
CTTGAAGAGAGGCCTTCTTAACGAGGATGAGGAGCAACTTGTCATTGACCTCCATGC  
TTGCCCTTGGCAACAGGTGGTCCAAAATCGCAGCAAGATTGCCGGGAAGAACAGATA  
ATGAGATCAAGAATCACTGGAATACCCACATTAAGAAAAAGCTAATAAAGATGGGA  
ATTGATCCTGTTACGCACGAGCCTCTCAATAAGCTAGAGAGTCCTCAAGAAAGTACA  
GTACCTTGTCACACTAATTATGATCAACCCAATTTTAACGCTGATGGCCAGCAGGTC  
CTCCCCAAAATTGTGGCCATGCCTCCTCTAGCACCCTGATAATTCAAGCACGACC  
ACCCCGACTGAAAATTCTTCAGTGGATGAATGCATAGGGTCATCAGAACCTAACAGT  
ACTCCTGACAGTGATCCACTAATGAGTTGCATATGGTCGGAGGTATTTCTTGATGAT  
TCATCTTGGAACCTTCAAGCCAGTAGAGGAGGAGATTTTAGTGAATTCGGGCTATCT  
AAATCTTCATCAGAGGATAGTAACTCTCCATGGGTTTTAGACTCTAAGGATCTTGGA  
GATGAATCTTTGGACTTAGTTGTTTCAGTGACATGGACTTGAGTATCCTAGACATG  
GGTGGCAAGCAT**TAA**

Potri.013G008600.2 (TALE family)

GATCAGTGAAGCTAGTATTCTTGCTGTTACAATTCTAGATTGATAAATATCTTGACA  
ATCTTTTTTTTGTATTGATAGACAATTT**ATG**GAGGGATTTTATAGGTTAATCCTAC  
AATTTCTTGTTACCAAATGATATTGCTAGACTTGAAA  
ACTTGCCTGTTGTTAACTTT  
ACTGATGCTACTACCAGTAACAACGAATTTACAGTCAAGTTGGTAATTTACTTCAA  
GCTGGTCATGGTTATACACCAGTCACTGAATCAGATATGCATGATGTAATCAAGACC  
CAGATCGCCAATCACCTCGTTATCCAGACCTAGTTTCTGCATACGTAGAGTGCCGA

AAGGTTGGTGCACCTCCAGAAATGGTTTCTCTTCTTGAAGACATAGGCAGATGTAGC  
TACCAAATCAATACTTGCTATGAGATAGGAGCTGATCCAGAACTTGATGAGTTCATG  
GAATCATACTGTGAGGTTCTTCATAGATACAAGGAGGAATTATCCAAGCCGTTTGAC  
GAGGCTACTACTTTCTTGAGCAGCATAGAATCACAACCTAAGTAGTCTTTGCAAAGGA  
ACATTGACTAAAATATTTGATTATGGCTCAGATGAGCCAGCATGGACTTCCGAGGAG  
GAGTTAAGCTGTGGGGAAGTTGAAGCATCTGAAATTCAGGGTTCATTAGGTTTTTAC  
TCAAGCGATCAGAATCTAAAAGGAGTGCTCTTGAGCAAGTACAGTGGCCATCTTAG  
CAGTTTGAGAAAGGAATTCCTAAAGCAAAGAAAGAAAGGCAAACCTACCAAAGGAT  
GCAAAGACATTGCTTTTGGACTGGTGAACCACCATTATAGATGGCCATATCCTACG  
GAAGAGGAGAAGGCGAAGTTATCAGAGATTACAGGGCTAGATCAAAGCAGATTA  
ATAATTGGTTTATCAACCAGCGGAAGCGGCACTGGAAACCATCAAAGATATGAGG  
TTTGCTCTCATGGAAAGTGTCCGGTGGTGACACAGCTGGACCAACATGCTATGGTATT  
GTTGGTGATGACATTGGGACA**TGA**GGAAACTCATGTTTGGTATCCATTCGTCATCT  
TCTACC

Potri.013G025000.1 (NF-YC family)

**ATG**GATCAGCAAGGGTATGGGACAAATCCATATCAGCCAAACCAAATGCCTGCTGC  
CTCAAATCCTGGATCAGTTCCTGGTCAGCCTGCAGGAGCTCAGCTTGAACAGCATCA  
ACTTGCCTATCAGCAGATCCACCAGCAACAGCAACAGCAACTCCAGCAACAACGCC  
AGTCTTTTTGGACAAATCAGTATAAAGAAATAGACAAAGTTACTGATTTCAAAAATC  
ACAGTCTTCCCTTGGCAAGGATCAAGAAGATCATGAAGGCTGATGAGGATGTCAAG  
ATGATATCAGCTGAGGCACCAGTTATATTCGCCAGGGCTTGTGAAATGTTTATTTA  
GAGTTGACCTTGCAGTCTTGAATCACACGGAGGAGAACAAGAGGAGGACACTACA  
GAAGAATGATATTGCTGCAGCTATCACTAGGACTGATATCTTTGATTTCTGGTTGA  
CATTGTACCTAGGGAGGATATGAAAGATGAAGTGCTTGCATCAATCCCAAGAGGAA  
CAATGCCTGTTGGAGGGCCTGTTGATGCACTCCCTTACTGCTATATGCCACATCCAC  
ATGCACCTCAGGTCGGGACTCCTGGGATGATAATGGGCAAGCCTGTGACAGACCCA  
GCCATGTATGCCAGCAATCTCATCCCTATATGGCACA**A**CATATGTGGCCACAGGGA  
CCAGAGCAGCAGCAGTCACCCTCAGATCAG**TAG**

Potri.013G107600.1 (M-type family)

CA**ATG**GGCCGCAGGAAGGTAAAACATGAATTGATTTCCAATGAATCTGCCAGGAAA  
GTGACCTTCAGGAAGAGGAAGGCTGGCCTACTGAAGAAGCTTGATGAACTCGCAAC  
TCTTTGTGGGGTTATTGCTTGCCTATTATTTTCAGTGCCTATGATGATCAACCAGAG  
ATCTGGCCTTCCCCCGCAGAAGCATTGTTTGCCTTGAAGAGTTGAAGAGATTACCA  
TCAAGAAAGCCAGGAAAATACATGGTGGACCAAGAAGCTTTTCTCAGCACAAACGT  
ATCCAAGCTGAATCAGCAACTGGAGAAACAAAGGCGGAAAAATCTAGGGCTTGAGT  
TGGAGTTAATGATGGCCGGCTGCAAAGAAGGTATGGATTTACATGATTTAAAACGC  
ATAAAAAACCCGTCTGAATCAATTCAGTTTCTGGAGGAAATGATTGCGTCTGTCACC  
TCTGAGATCGAGCATGCTGAGAATGAGAATAATGCT**TAA**

Potri.013G126800.1 (bHLH family)

GAGCTCCTCTGGCAATGCTGTCTCTGGTTTCTTGGGAGAATAAAGAATAGAAGTGCT  
AAAG**ATG**ATGGAAAACAAAAGAAGCCCTTGCTCAGTTGACCATGCCAGTCTCACTT  
CTCTTGCTACCAAAAAGGCACAAAGCTGATTTTTCCATCTCCACAAAGGAACGAAAAG  
AGAAGCTCGGGGAACGAATTGTAGCTCTGCAGCAGCTTGTTTCACCATATGGGAAG  
ACTGATACTGCATCGGTCCTTATGGAGGCAATGGAGTACATACGGTTCCTTCATGAA  
CAAGTTCAGGTGTTGAGTGCTCCATACCTCCAAGGCACATCAACAGCTCAAATGCAG  
GAGTTAGGTCAATACAGTCTAAGAAACAAAGGTTTGTGTCTCGTTCCGACCTCGTGC  
ACTGCTGGCATTGCTCGCAGCAATGGAGCAGATATCTGGGCCCCCATCAAGAGCCCT  
TCTCCAAATTCAATAAGGACGTTTCACCATTTCAT**TGA**CACAATTTACCTCAGCAA  
CTTGTTAAGGTTGTTTTAAGTTTCTAGATAAGGTGGCGTTAAGGGTAATCACCTTTCT  
GGAGGCGCAACAAAGTTTTGTCAGGCAGATGCAACTTTGTAACAGAATTTAACGTG  
GGAAAAATGGATTTTCGCTTGTTATATTAGTCAAGCTCTCAATGATGTAAAATGTCT  
**GATGTAAAATGTCT**AAGTCACCATTCTAGTATTATCTATGT

Potri.014G050000.1 (WRKY family)

CAGCTTGCGCTCGACACTT**ATG**CACCAAATAAGCCAACAAGAAGAAGAAGAAG  
CACAAGAAGGACAGAGAAGCTTTTTGATCAGAATGGATCATGGAGAAAGAGATGTT  
CCAAATTACGAGCTACATGTCTCTTTCTCAACACCACAAGCAATCCATGAGATGGGT  
TTTGTTCAATTTGAAGAAAACCAGGTCTTGAGCTTCCTGGCCCCTTCACAATCTTCTC  
AGATATCTCAGCCTCTAAATGCTAATACTACCACAACCAACAATACTCACATGGGGT  
TTAGTCATAATGACCAGCAGGTGGGAGCATTGGATCCAAAGGCTTCTAGTGATGAG  
AACTGCACTGGTAATGCTAACAACGATGGCAACAATTCATGGTGGAGGAGCTCATC  
CGCAGACAAGAACAAGTTGAAAGTGAGGAGAAAGCTTAGAGAACCAAGATTTTGT  
TTCAAACAAGGAGTGAAGTGGATGTTCTTGATGATGGTTATAAATGGAGGAAATAT  
GGCCAGAAAGTTGTCAAAAACAGCCTTCATCCAAGAAGCTACTATCGTTGTAATCAC  
AACAACTGTCGAGTCAAGAAGAGGGTTGAAAGATTATCAGAGGATTGTCGAATGGT  
GATAACAACCTTATGAAGGTAGACACAATCACTCTCCATGTGATGATTCCAATTCATC  
AGAACATGAATGTTTTTCTCTTTC**TAA**TTAATACATACTTTAGTTAAATTATTAAGA  
AAGACTGTTGTAATATTATTAGAATAAGAATATATAACGTATCATCAGCTTATGACA  
GTATTTGCTAGTAAATGGTTTTGAGGGGTTTTTCATCTTCCCAAGATCAGCCATTTCTG  
ACAATTAATACGTACCTGTTGATATATGACA

Potri.014G100100.1 (ARF family)

**ATG**AGCCAAGCAACGCCTACTCAGGAACTGGCTGCCAGAGATCTTCATGGCTATGA  
GTGGCGGTTCAAGCATATATTTAGAGGTCAACCACGGAGGCATTTGCTTACAACAGG  
ATGGAGCACATTTGTCCTTCCAAAAGACTGGTTGCAGGAGATTCTTTTGTGTTTCTT  
AGAGGTGATAATGGGGAATTGCGAGTTGGGCTTCGGCGTGTTGCTCGTCAGCAATGC  
TCCATTCGTCATCTGTGATATCCAGCCAAGCATGCATTTAGGAGTGCTTGCGACT

GCCTCTCATGCTGTTTTGACACACACTCTCTTTGTTGTGTACTACAAGCCAAGGACGA  
ACCAGTATATCATTGGGCTGAACAAATATCTGGAGGCTGTTAAGAATGGATTTTCTG  
TTGGTATGCGCTTCAAGATGAGATTTGAGGGAGAGGATACTCCTGAGAGAAGGTTT  
ACAGGCACCATAGTTGGAGTTGGAGATATTTCTCCAGAGTGGTCTGGTTCTATATGG  
CGGTCGTTGAAGATTCAATGGGATGAACCAGCAACAATTCAAAGGCCAGAGAGAGT  
TTCTCCATGGGACATAGAGCCTTTTGCAGCTCCTGCTTCCCCAAATCTTACTCAACAG  
GTGGTGAAGAGCAAAAGGCCCCGATCCGTGGATATTCCTACATCTGAGATTACAAC  
AAATCCAGCTGCTTCAGCTTTCTGGTACCATGGACCAACCCAATCTCGTGAGTTAGT  
CCAACGAGGGAGTATTACTGAAGTCCAAAGCTCTGAAAGCCATGTCTGGTCTATGA  
GGCAGAAGGAAATTGATAGCAATCTCAATAATAACGGTAGCTGTAACCTCAAGGGCA  
CGACCAGAAGGAATCTGGCCTTCTTCATCTCACATGAACGTCTCTCTCAACTTTTTTC  
CAGATTCAGCAGCGGACAACAAATGTGCTAAAACACAGTCTATTATCTCTGGTTTTG  
CCTCTTCTATATCAAGGCAAAGCAATGGCCTGATAAATGAGCAGGTGGAGAGGGGG  
AGAAAGTTCGAGAACTCTGTAGGTTGCCGGTTGTTTGGAAATTGATCTGACAAGTAAC  
TCTGGCATTGCTGCTGTTCCAGAGAAGGAACCTGCATATCCAATTGTTGATTATAAT  
GGAACCAAGGACTTGTTCAGCTTCAAGTGAGGCTGAGAAGGCTCAAACCATGGA  
TGTTTCAATGTCCTCAAAGAAGCAGAAGCAAGTTGTACCAGACACATTGGCAAAGG  
AGTCACAAAGCAAGCAAGGCTCCACAACCTCCACGAGAACTCGTACCAAGGTGCAA  
ATGCAAGGGGTTGCTGTTGGCCGCGCTCTTGATTTAACTGTGTTGAAGGGGTACAAG  
GATCTTATAAATGAGCTGGAGAAAATGTTTCGAAACTGGAGGAGAACTTTCCACGCG  
TGAAAATGGGCTGTTGTGTTTACAGATAATGAGGGCGATATGATGCTTGTGGGCGA  
TGATCCATGGCCTGAGTTCTGTAAGATGGTGAAGAAGATATTCATATATTCAAGTGA  
GGAAGTAAAGAAGATGAGCACACGATGCAAGCTTCCCTGCATCTTCTTTTGGAGGGTG  
AAGGGACTGTTGTAAGCATGGAGTCGGAGCACAAAGTCTGATGCA**TGA**

Potri.014G120800.1 (bZIP family)

TCAAATCAAATATCTCTGCTAATCCTGTTTGTTTTTTAGATCCTGATCCCTGATTCTTC  
ATCTAATCTAATTACAACCGAAGGTATTGAATTTATTTGATTAACTAGTGATTATTT  
TATCGAAGAATCTAGAAATTGTAAAAATAAA**ATG**TCTGCAAGGCAAGCAGCGAGC  
TCAGGATCGGACAGCGATCCACGATATGCGAACGTGATGAGAGGAAAAGGAAGA  
GGATGATATCCAACAGGGATTCTGCCAGGCGGTCCAGGATGAGGAAGCAGAAACAA  
ATGGAGGATTTGGTTAATGAAGTGAGCAAATTGCAGAACGAGAATAATCAATTGAT  
GCAGGGTATCAATGTTGCCCAACAACGCTACATGGAGATGGAATCAGCCAACAATG  
TTCTGAGGGCTCAAGCTGTGGAATTGACTGAGAGGCTGCGGTCGTTGAACTCTGTGC  
TGCAGATTGTGGAGGATGTTAGCGGACTCTCCGTGGAGATACCTGAAATACCTGATC  
CTTTGTTCAAGCCGTGGGCAGCTCCCGTGTTTCAAGTACAGCCTATTATGACATCTGC**TG**  
**A**TTTTTTTTCAGCATTGATGAATGTGAGCTTGTTCGGTGCCTTGTCTGGGAGATTGTGTT  
TCTTGTTCCGGTCTTTTTTTTTTGTCTATCTGGGTCTTTATATTATGTAGTTTATTAGGT  
CGTAGGTGGATGCTGGTATCGCGTGAATGTGTTTTGATGGGGGTGTGGTTTGTATCGG  
AGTTGTGATGTTACGTGTCCTGTTTTAATTTCTATCTGCGTTTATGATGAGTCAGTTT  
CCAATCTGTGGCATTTCCTTCACTGC

Potri.014G167000.1 (FAR1 family)

ATGAAGCCATCAAATAACATATGGATTTCGGCGCCAGCAGTGCCCATGTGGAGATTG  
GAAGTGTTATATTAAGTATGAGGGAGATGATCAGACTTCAGCAAGCTCTCAGCTAG  
GAAGGAGTGAGACAACATCAACAGAATTAGTCTTCACTCCTTACGTGGGTCAAATTT  
TCAAAAGTGATGATGATGCTTTTTGAATACTACTCCAATTTTGCTCGGAAGAATGGGT  
TTTCAATTAGGAAAGCACGGTTCGACTGAAAGCCAACATTTAGGGATTTACAGACGA  
GATTTTGTGTTATCGTTCTGGATTTAATCAACCACGGAAAAAGGCAAATGTGGAG  
CATCCCCGAGATCGGAAATCAATACGATGTGGATGTGATGCAAAATTGTATTTGACA  
AAGGAAATTGTTGATGGTCTTGCCCAATGGTATGTCTCACAGTTTAGCAATGTTTCAT  
AACCATGAACTGCTGGAAGATGACCAAGTGCCTTTGCTACCTGCATATCGGAAAAT  
ACAGGAGGCTGATCAAGAGAGGATTCTTTTGCTATCCAAAGCAGGGTTTCTTATTA  
TCGGATAGTGAAGGTGTTGGAGTTGGAAAAAGGAGTTCAACCTGGACATTTTCCCTT  
TATAGAGAAGGATGTTAGGAACTTTGTTTCGGACTTGTAAAAAGACTGTTCAAGAAA  
ATGATGCTTTGCTCACTGAGAAGAGAGAGAATGATACATTGGAACCTCTTGAGGCCT  
GCAAGTCTGTGGCTGAAAGGGATCCAGATTTTGCTTATGATTATACCACAGATGAAA  
ATCAAAGGTTGAAAATATAGCATGGTTGTATGGGGATTCTGTTCGTGCATATACGT  
TGTATGGCGATGTAGTTACTTTTCGACACCACATATCGTTCTATTACCTACGGCTTGCT  
CCTAGGAGTTTGGTTTGGCATGGATAACCATGGAAAAGCAATTTTGTATGGATGTGT  
TTTGCTGCAAGATGAAAGTTCTCATTCTTTACATGGGCTTTACAGACTTTTGTCCGC  
TTTATAAAAGGAAGACATCCACAGACAATTATAACAGATATGGAGTTGGCCCTTAG  
GGATGCCATAGCAAGGGAGTTGCCAAATACAAAACATGTTGTATGTATATGGCACA  
TTCTATCTAAGTTATCCAGCTGGTTATCTTTTCCCCTTGGATCGCGGTTTGAAGATTT  
TAAAGCTGAGTTTGACCTCTTGTGTCATGAGGAAAATGTAGAAGACTTCGAACATCA  
ATGGAATCTTTTGGTTGCCAGATTTGAACTTGTTACAGATAAGCATATGGCTCTACTC  
TTTTCATATCGAGGATTTTGGTCAATTTCCCTACATTAGAGGTTTCATTTCTGGCTCGCA  
CAATGGCACCTGAGTTTTCACAGTCTCTGCACACATTCCTGAAAAGAATCTTGGGTG  
GACAAACATGTCTGCAAGCATCTTTTGGAGCAGATTGGTCTTGCTGCAACTGTTGGAA  
ATCAAACCAGAGATGGGACGCCGTATATGCATATCAAGACATGCTTGCCAATTGAA  
GAACATGCACGCAGTGTGCTTACACCTTATGCCTTTAATGTGTTGCAGCATGAAATT  
GTATTGTCGTTGCAATATGCTATACAAGAAATGGCAGATGGATCATATCTTGTCCAA  
CACATCAAGAAAATGGATGGCGAACGTTTTGTAAATTGGATGCCAGAAGATGAGCA  
AATTCAGTCTTCTTGCAAGGAATTTGAACATTCGGGGATATTATGTAGGCACTCTCTT  
AGACTGCTTGAGGTGAAAACTACTTTTCAGCTCCCAGAAAGATATTTTCCCCTTCGC  
TGGCGACGGGACCAATCACTGGTTCCCTATGGATGATCAAAATGCTCAAAGCAACAA  
CGATGAGTGTGCTCAAGCCTTCCATGCTCTTGCTGAAGCTCTATTGACAGAGTCCTT  
GATATCGAAGGAACGTTTTAACCATGTACAAAGAGAAATTACGGGGCTCCTTGCTG  
AAGTTAGAAGTATGCCAGTGGCTGAAGAATTATCTCTGAATATACCCCCTAACAATG  
TCAGTGAAACGTAG

Potri.015G082700.1 (MYB family)

TCACCTGAACAAACTCTTGACTTTTTCACTCATACTAGGCATAAATGTATAACC  
AACTCCTCGTTTATACCTTTCCATCTTGTTATATAGCGGCTGCTGCAGCTGCTTAGAG  
TTTTATTGATAACATACTGTCATATCGCTGTAATCTTTTGAGCAGAAATGGACGA  
CATTCTTGTTGTTTAAAGCAAAAATTAAGGAAAGGTTTGTGGTCACCTGAAGAAGAT  
GAGAACTACTCAATTATATACTAGATTTGGTGTGGTTGCTGGAGTTCTGTTCTTA  
AGCTAGCTGGTCTGCAAAGGTGTGGAAAGAGTTGCAGGTTGAGATGGATAAACTAC  
CTGAGACCTGATCTTAAAAGAGGAATGTTCTCTCAGCAAGAGGAGGATCTAATAAT  
CAGTCTTCATGAAGTTTTGGGTAAACAGGTGGGCTCAAATTGCTGCACAGTTACCAGG  
AAGAACAGATAATGAGATTAAGAACTTATGGAATTCCTATCTGAAGAAGAAGCTTA  
TGAAGCAAGGTATTGACCCAACAACCCACAAGCCTCTATGTCAAGTGGGGGTGAAA  
GAGGAGAAGGATTGTACAGAGAAGGCATCTTTCCAAATACCACAGTCTAAAGGGTT  
GCCATCGTATCAAACCTTCACTGCACAAGAGCCAGCATTCTCATTAAATGATACTAC  
TTACAATAGCAGTGGATTACCAGAAGTTTCAAGAGAGCAATTTCTCAACAAGCAAG  
CCTATGATCCTTTATCCTACTTTGAATTCCCTGCCGGTATTGATCTTACTGGGTATAA  
TCCAAGCCTTTCAAGTGTGTATCATCCAAGTGTAGATCTCTTGATCAAAACCAATTT  
GAAACAAGTTCAACTTTGGATTCACTTCAATGCCAAGTTTAAACAAGTTTTGACCAT  
GGAAGTATGAGTGGGACGGATTTCTCCGATAACTCGGCTTCAAGAATGAGTTCAATG  
TTCTTGAACGAGGCAAAGGAAAGTTCCAGTAACAGTTCAAACATCAGCAATTATGC  
AGGATACCAGATGAACAATATGGTGGAGAATGCAGCAGCTTTCTCATCATGGGATT  
CTGATGATCATAAGTTAGAGTCGGTGTTCATATCAACAAGTCAATGGGGTCAAGA  
CAGAAGAATTGAAGCCTAGCCCATGGCATGAAGCTGGACGGCTCCATACTCATCAG  
AATTCAGTAGATTTCAATAGCTATCCGTTAACGTCGCTGTCAGAAGATATAACAGGA  
GCAAATTTTGATGTCTTCCACCAGATACTGTAATTCATTAATTTACCCCCCCC  
CTCTTCTCTCCAAAC

Potri.015G097400.1 (NF-YC family)

ATGGACAACACCACCACCAATCACCAGCCTCAGCCCACGGCATAACCAACGCAATC  
CATCACCACCCTCCACCCTACCTCCAGCAGGTGGAGCACCATCCTCAACCCATT  
CCACCACCTCCTCCAACAACAACAGCAACAACCTTCAAATGTTTTGGTCTTACCAACG  
TCAAGAAATTGAACAAGTTAATGATTTCAAGAACCATCAACTCCCTTTAGCAAGAAT  
CAAGAAAATCATGAAAGCTGACGAGGATGTGCGCATGATCTCTGCTGAAGCACCTA  
TTCTCTTTGCTAAAGCATGTGAGCTTTTCATTTTAGAAGTCAATTCGTTCTTGGCT  
TCACGCTGAGGAAAACAAGAGAAGGACTTTACAGAAGAATGACATTGCTGCTGCTA  
TTACAAGAAGTCAATTTTGGATTCTTGGTTGATATTGTACCTAGAGATGAGATCA  
AAGAGGAAGCTGCTGGTCTTGGTGAATTGTCGGTGTACGGCTAGTGGGGTGCCAT  
ATTATTACCCTCCGATGGGACAGCCTGCCGCTGCCACTGGAGGGATGATGATCGGAA  
GGCCAGCCATGGATCCTGCCACTGGGGTGTATGTTCAACCACCTTCTCAGGCTTGGC  
AGTCTGTTTGGCAGACAGCTGCCACCGAAGATGGTTCTTATGGGAGTGGTGGTGC  
GTGGTGGACAAGGGAATCTTGATGGACAAGA(Deletion:GTAT)TTAAGCTTCTCGGAT  
GCAGAGGTGCGACAGAGGCTAACAAGGGCCTTGGCTAA

Sequence with Blue underline represents the premature termination codon.

Potri.015G129100.1 (MYB family)

GTGATGGGTAGACAACCTTGTTCGACAACTTGGTGTGAAGAAGGGGCCTTGGAC  
AGCTGAGGAAGACAAGAAGCTGGTCAGTTTTATTCTCTCACACGGCCAATGTTGTTG  
GCGTGCTGTACCAAAGCTCGCCGACTCCGCCGATGTGGCAAGAGCTGCCGTCTTCG  
CTGGACTAATTACCTCCGGCCTGACTTGAAGAGAGGCCTTCTTAATGATGATGAGGA  
AAAACCTTGTCATTGATCTCCATGCCCCGCCTTGGCAATAGGTGGTCCAAAATCGCTGC  
AAGATTGCCGGGAAGAACAGATAATGAGATCAAGAATCATTGGAATACTCACATTA  
AGAAAAAGCTTATTAAGATGGGAATTGATCCTGTTACACATGGGTCTCTCAGTAAAC  
AAGTGAGCCACAAGAAAGTACAGTATCTTGTCACACTAATTATGATCAACCCATTA  
TTAATGCTGATAATCAGCAGGTTCTTCCCAAATTTGCGCCCATGCCTCCTCTCGTAC  
TGATAATTCAAGCACTACGACTACACCGACAGAAAATTCCTCAGTGGATGAATGCGT  
AGGGTCATCAGAACCTAATAATGACAATGATCCAACAATGAGTTTCATATGGTCAG  
AGGCATTCCTTGATGACTCATCTTGGAACTTCCAAGCCACGAGAGAAGATTACAGTG  
AATTTGGGGTATCTAATTCTTCATCAGATCAGGATAGTTACTCTACATGGTTTTTAGA  
CTGTAAGGATCTTGGAGATGAATTCTTTGGGCTTAGTTGCTTCAGTGACATGGACTT  
GAGTATCCTAGACATGGGTGGCAAGCATTAATGCACTGCCTCGTAGAGTGATCA  
CAAGGTATATTAAGTAACAAGAATGGAAGCACAAGGATTATTGAAGGCTCAAGCT  
TCCTGAATTTTAGTTTCTATATAGTCTTGCACCTAGTTTTTTTTTTTTTCCATCCCAC  
CATTCAAATATTGAAAAGAACAAGGGAAAGGAAGATATTGAAAGTGTTAATAAT  
GATTTTCCTTTCCTTATCCAATATTCCAATAAGAGTTTCAAGACCCTTATAACATT  
AG

Potri.016G035400.1 (bHLH family)

CCTTCCCTCCGTTTCATTTTCTTCTTCTTAGAGCAATCCAAAAACACAACATGCAGC  
CTGAAAACCTGCTCAGAGAATTCACAGTTGTACCGCTTCTTGCAGAGAATGGAATGA  
TTAACGTTGGTGCATATGGTTTCCAGGCGCCGCGATGCAAACCTTGTGTACCTCAT  
CATCCACCTCCTACCATAACAATAATTACCAATTTGAAAGTTCTGTAATCACTGATA  
TGACACCACAAGATAGAGCTCTTGCTGCTTTGAAGAATCATAAGGAAGCTGAGAAG  
AGAAGGAGAGAGAGGATTA ACTCTCATCTTGATAAGCTTAGAGGCCTCCTTCTTGC  
AATCCAAGACAGACAAAGCTTCACTTCTAGCAAAGGTTGTCAAAGAGTTAGAGA  
GCTGAAACAACAGACCTCAGAGCTTCTGGACTTGAACTTTCCCATCAGAAACAGA  
TGAAGTCACTGTACTCTCTGGTGAATATTCAAGCGATGGACAGCTAATATTTAAGGC  
ATCTCTTTGTTGTGAAGACCGGTTGGATCTCATGCCAGAACTAAATGAGATACTGAA  
ATCTCTACATTTGAAGACATTGAAAGCTGAGATGGTAACACTTGGAGGAAGAATTA  
GGAATGTTCTTATCATTGCGGCCGATAAAGATCATAGTGTTGAGTCGGTCCATTTCTT  
GCAAAATGCATTGAAATCTTTGCTAGAACGCTCGAATTCTAGCGAGAAATCGAAAA  
GGCGAAGGATATTAGACCGAAAATTAGTAATCCAAATGATGATTAGTATTATTGTTTG  
TCGTAGTTAATTTCTT

Potri.016G087400.1 (S1Fa-like family)

GCTGATCTCTAGCAGCCATGCTGACGATTTTCGAGTTCTCTGATCAATCTCCTCCTTC  
CTTCCAGAATATGGGGAATGTGATCAAGGATGCTGAGCCTAAAGGGTTAAACCCGG  
GGTTGATAGTGCTGCTGGTTATTGGGGGGTTACTCATGTCATTCTAGTTGGAAACTT  
TGTACTTTACACATATGCGCAGAAGACCCTTCTCCGAAAAAGAAGAAGCCAGTCTC  
AAAGAAGAAGATGAAGAAGGAGAGACTGAAGCAAGGTGTATCTGCACCAGGAGAG  
TGA

Potri.016G112300.1 (MYB family)

CAACTAATCGGGGCATTGGAATCTGTCTCCGGCCTCGTATTTACAGAATTCAA  
ACTGGTTTTTTCACGAAAGCAGGGGAACAAAATGGACCCCTGAAGAGAACAAGCAG  
TTTGAGAATGCTTTGGCTTTGTATGACAAGGATACGCCTGATCGGTGGCTGAAGGTG  
GCAGCCATGATTCCAGGCAAGACTGTAGGTGATGTCATCAAACAGTACAGGGGAATT  
GGAGGAAGATGTTAGTGATATAGAGGCAGGACTCATCCCAATTCCTGGATATAATA  
GTGATTGTTTCACATTAGAGTGGGTGAGTAATCATGGGTATGAAGGGTTGAAGCAAT  
TTTATAGTCCTGGAGGTAAGAGGGGCACAGCGACTCGGCCTTCTGAGCAGGAAAGG  
AAGAAAGGTGTGCCGTGGACTGAGGAGGAGCACAGGCAGTTTCTTTTAGGTCTTCA  
AAAGTATGGTAAGGGGGATTGGAGAAATATCTCCCGCAATTATGTGACTACTAGGA  
CGCCAACTCAGGTGGCTAGCCATGCACAAAAGTATTTTATTAGGCAAAGTACTGGA  
GGGAAGGACAAGAGGAGATCTAGTATCCATGATATCACTACTGTCAATCTTCCAGAT  
GCCAGATCTCCATCACCAGAAAACAGAAAGCCATCATCTCCAGATCATTCAACCAC  
AACCAAGCAATCTCAGGCATCACCAATAACGACTGGCATGGTTAAAGGGCTATTTG  
ACTGGAAACCCCAAAATGAAGGAACAGCCACAGTTTTCAATCCAGCAAATGGCAAT  
TTGTTGATGGCACCTTCTGTGGGATATCCTCATATGGATCCAAGCTGCAGGAGCAA  
AATCTGCTTGGAGGAACACTCCAGGATATCAGTTCGGTCCTTACAATTTGATTTTC  
AGATGCAATCAATGCAACATCAC

Potri.017G130300.1 (MYB family)

ATCTTGGTGTTCGTGAAAGGGAAGGCAACCATGTTGTGACAAAGTTGGGTTGA  
AGAAAGGGCCATGGACTTCTGATGAGGATAAGAACTCATTACCTTCATCCTCGCTA  
ATGGTCAATGTTGCTGGAGAGCTGTTCTAAGCTTGCAGGATTGTTAAGGTGTGGGA  
AGAGTTGCAGGCTGAGATGGACAACTATCTCAGGCCAGATTTGAAGAGAGGTCTT  
TTATCAGAATACGAAGAGAAGATGGTGATTGATCTCCACGCTCAACTTGGCAACAG  
ATGGTCTAAGATTGCATCACATCTACCCGGCAGAACTGATAATGAAATCAAGAACC  
ATTGGAATACTCACATCAAGAAAAAGTTAAGGAAAATGGGAATTGATCCTCTCACT  
CACAAGCCACTCTCTACCATTGAAACACCGCCGTCACCACCACCACAGCAAGAAGT  
TCAAGTGCAGGAGAAATACAAGAAATAGAGCAGCAAGCTGTACAACAGTCTTGT  
CCACTAATATCGTATCTGAACTGGACCAAAATAAGGAACTGAGACATCATTCCGAT  
CAACAGTAACTCAAGAGGAAGAGATCAATAACATGGCCGCAAGCACATATGGCACA



ATGGAGCAAACGGATGGTTTTTGCATAGATGAAGTTCCGCTAATTGAACCCCATGAA  
ATCTTAGTCCCTTGTGGACTTTCTCCTTCATCAACCCCAACCTCTTCATCAT  
CGTCATCGACATCATCTTCTTCTTTCATATGGTTCAAACAATATCCTTGAAGACTT  
GCTACTGCCAGATTTTGAATGGCCTATTAATAATGTCGACATTGGCTTGTGGGGTGA  
TTACCTGAACAGTTGGGATGTGCTAATCAGTGATGCTGTCGGTGATTGGAAGCAAAC  
ACAATGTTTGATCCTCCTCTCAATCAGTGCTCAAGAATGATATTGGATCAAGATTC  
TTGGACAAATGGGCTCTTG**TGA**

Potri.018G083700.1 (bHLH family)

AAGAGATCATCATATACCAAGGGGGAAAAATATATATTCTGTAGGAAGGCA**ATGAA**  
TAGAGGGGTTTTGCAGAGTTCACCGGTGCAGCAAATGATGGCTGGCAACCCCAACT  
GGTGGAGCATCAACAATATGAGGCCACCAATAACTCATCATCAACAACCTCTCCTT  
TTCTGCCTCCTCCTAGTCTCTTCCCTCAATTCCTACCTTCCATTTCTTCTTTCATCAT  
CTTCTCTTCTCCTTCTTCTTGGAAATTATGATAACCCAGATCAGCTTCCAGAGTCATG  
GAGCCAACTACTTCTGGGTGGATTGGTGTGTGATGAAGACAAGAGCAATATAAGCA  
ATTTTCAAGCAAAGAAGATGGAGAATTGGGAGGAGCAAGTGTTACATCAAGCATCA  
AGTGCTTCGGTTATGGATGTCAAGCAAGAAAACCTCTGCAAGCAACTACGTGTACGGT  
GCAAATGAAGATTTCCAGGCAGCTGCAAAACCTACAGCTTGTCTCAAGTGATACCT  
GCTTCATCCCCAAGTCCTGTGTTACCAGTTTCAGCAGTAACATGTTGGATTTCTCTA  
CCAGCAAAGGAGATGGAAGGCATCCACCACCAGATCGATCTTCTGATTGTAACAGC  
ACCGCTAATGGTGGGGCAGTAAAGAAAGCTAGGGTTCAATCTTCTTCCGCCAACCT  
ACCTTTAAGGTGAGGAAGGAGAAATTAGGTGATAGGATTACCGCTCTTACCAGCTT  
GTTTCTCATTGTTGGGAAGACTGACACGGCCTCTGTCTTGTAGAAAGCTATTGGGTAC  
ATCAGATTCCCTCAGAGCCAAATTGAGGCTCTCAGCTTACCGTACTTGGGCAGTGGA  
TCCACAAATATGAGGCAGCAACAATCTGTTCAAGGAGAAAGCAACTGTATATTTCTT  
GAGGACCCCGGTCAGCTGTTGAATGATAGCTGCATAAAGAGGAAAGGAGCTTCTCA  
GCAGGACTCTCACGGGGAGCCAAAGGACCTGAGGAGTAGAGGATTGTGTCTTGTTT  
CAGTGTCATGCACACTGCAAGTTGGCAGCGATAATGGAGCAGACTACTGGGCTCCC  
GCTCTTGGAGGGGGGTTCCGA**TAG**GCGGAACAATCTTCTGGTGG

### Supplementary Table 5.

Sequence of 7 DNA-baits

*PtrCCoAOMT1* (Potri.009G099800)

CGTGCTGAGTTGGTGGTTGTTATGGATGGAAGAAAATTACCTCCAATTTGGATTAAT  
TTTTTTTGGGTACTTCATTGTTCAATATATTTATTTGATTCATATGATAATAATTTTGT  
GTTGTAGCCTACTTAGTTAGCATAACGTTTCTAAATCTAGAGTTCGTGGTTTATTTTAA  
TATTTTAAAGTATTTAAAAAAAATAATTTTTTTAATTTTTTATTTGGTTTAAATTA  
ATTTTTTTTTGTATTTTTATATTATTTTGTGATGTGATGATATAAAAAATAAAATTTTAA  
AAGTAACCTTATCTAAATACAAAATAGGCTCTATATATAAGCCAGAGGAGGTGAT

ATTTTGATTATTTTCTTTAAGACTATAGATGACCCGATAACATGAAACAAAAATATA  
AAAACAAGGTCAACCGTGTGACTTGTTCGCTCCCGTCCCGGGTTCGACCCTCTATG  
TGCACGCTGTACCCCCGCGGTGCCTTACCTGCTCCTGGGCTTGCAGGATGTCCAG  
TGGGCCGTGGGGAATAGTCGTGGTGC GCGTAAGCTGGCCCCGACACCCACGTA  
TCAAAAAAAAAAAAAAAAAAAGGTCACGCGGGCATTCTAGCTTCTCTATAGGCATTT  
GCTTTGAGCCTCCGACCATTCCCCCTGCTCTTTTCTTATTCACGATAGAAGTCTGTT  
CAGTTAAAGAAAACATGGCCTGTTTTCTAGAAATTTATCTATAAAAAAGGAAATTC  
TTGTTAAAATAAAGAAAAAATTCAATTGAAATACACTTCCCAGCTTTCGAATGTTT  
CTATTATATTTTGGAAAACATGTGAAAAATATTTTATTAATGTTCACTTGAAAAAT  
GGTTATGGTTGCTTTTCAAAGTGTTTTTACTTGGAATGCTTTAAAATAATATTTTT  
TTATTTTTTAAAAATCATTGTGATATCAGCGCATCAAAATGATTTGAAAACATTAA  
AAAATATTAATTTAAAACAAAAAATAAAAATAAAAATAATTTAAATTTTTTTAAATAC  
TTTTAAAACATAAAAAAAAAAAAAACAGAATAGAATTTAGACATAAAAAGTGTTATTCT  
CGTCGTTTAATAGCGGGAGGTGGTAAGAAACATGCTAAGCATTACAGTTTTGGATA  
TTGATTATCCATGTGTTACCCTAAAAATGCCTTTTTCCATTTTCATGAAATCCTCATT  
TAATAGCAATTCTTTAAAGGAGGAGACTAGAGACAGAGGTGGCTGCTGTCAACCTA  
GTCGGTGAATTTAACTTCAACCGGCACATATATGCATACCAAGTATACCCTTTACA  
TCTGCCCTAATTAAGACTGTAAAACGGATTTGGATTTTTGCCGACAAAGGCTAGTTT  
GTGGAGAAAAACAACGAAGATAAATTTTTAGATGACAAAGTCAACAATAGTTCTGA  
GAGATTCTTTAAAGGACTCATCCGTTGACGGAGGTGGCCATATGCTACCAACTCTTG  
GACGTGGAGTCCCTTTGGTAATTTACCTATCCCTCACCCAATTTCTATTAGCAGTTA  
GCACATGTAATTTATGATTGGTGAGCCAGCACAAATCTTTTCCAGTTAAACACATA  
TATTAATTTATGATTAATTATTTAATTCTCTCCACTCTTAACAAATTAATCATAATG  
GCATAACATTTTAGCTTTTGATCTCGAGAATCTCTACCTAACCATTGACTTCTTTACT  
GTTCAGGAATCTTAGAAAAAGGAGGACAAAAAAAATATGCCCAATAAATTATTT  
AAGAATTTGAACCGAGATTTGGTGT CATAGATCCCAAAAATGACGTCAGCGATGCCT  
CAGGGAAGGAGTACCACTAGCCCACAGCACGATACGATCACCAACAAGGTGGGTCC  
CATATTTGGTGGGCCAAAAACCCACATTATCCTTCGTCCTAACTACAGGAACCTCAC  
CAACCCCTCCCGGTTGGTAGCCGGTCCAGCCTCCCCGCTACTCCAATTCAAACCGG  
GCTCTCATTTCCAATAAATACCACCCGCCCTTTACCATTTTCGATCAGGTTAGGCATC  
ACTACCATCATCAACAACAAAAATAAAAATTCCAAGGCCAAGAAAGAGATCGTAGT  
TTAATTAGAAGATATACACAATA

*PtrCCoAOMT2* (Potri.001G304800)

CGACCTGATAGCTAGACTGATCAGGTAATTTGATGGTCTTAGACTCGCCCGCCAG  
AGTTAGTTCACTCCAGAGAGGGGAGGTTGCTGATTTTCTTAGACTTTGATGGTCTC  
ATCATCAATGGCAATTATCTTATCTTATGGGCTACTGCATAAAGCCCATCTAACTCAT  
TTCCCTTCTCAGCTTTTGCTATTTTTATTTCTTCTCTAAAGAAAGAAAGAAAAA  
CCATCGATGTTCATAATGGACCAAAAACAAAAGGAAATCTTTTATTATTATTATCTG  
GACTTTAATTGGTGGTTGGTAGCCCTAAGGCTTGA ACTCAAAAAGAAGCAAGCCTCT  
CCTCACCAACTTTGACCTAGTTTTTAATCTTTTTTATTTTTTAAAGTTTTGATGGGG

AACACTTCTTTCACGACCTTGATTTTTCTAATGATTGTTTGGTTATTGAATTATTACA  
AACCTAATCTCATGCGGTTTATAACAAGGAGCTCCCGTTAATTATTAGGAGTTAGTT  
AGTTAGTATGGTAGCGGTGATAATTTAAAATATTATTTTATAGAGATATATTA  
ATTTTTATTTTTTAAAAATTATTTTTAACATCAACACATCAAAACAATCTGAAAAA  
AAATTAATTTTTAAATAAAAAAATTTAAATTTTTAAAAAACACGGTTTCAACCGCGTT  
TCCAAACACGATTTAATACACAGTATATTTTTGCATTTCAATAGGGTTTTGAAAA  
GAAATGAATTTTTATTTATTTATTTTGCTTTAAATTATTTTTTAGTATTTTTAGATCGTT  
TTAACATGTCAATGTCAAAAAAAATTTAAAAATTTTAAAAAATATTATTTCAATTT  
ATTTATAAGAAAAAAACCTTAAAAATCAATCATTACCAAAAATCAA  
ACTGGCTCTGAAAGTATCTCATAGCAGAATGCACTAACCAATTATTTAAATTTTCCATCCTGTCAT  
GGAGAAAGATTCCATGGTTGAAGACTGTATGATAAGGAAAAATGTCATGA  
ACTCATGGTATAAGTAATTTCCATCCAATAACAGCAAGCTTGATGTTAGGTTAGGGTTGATG  
GTTGTCTTCTTTCATTGAAATGTTTTGCTATGCCACACGAAACAAGGCAAGAAAAC  
CAGACAAGATCACGAAATCGTTTTAATGTGTTGGTATTA  
AAAAATAAATTTTTAAAAA  
TAAAAAATATTATTTAATATATTTATAAATAAAAAAATTTTTAAAAAACATCTAT  
TACTTAAAAAAAACATTAATTAATTACTGCCTAGCTTTACTAGAAAATCCACAC  
ACTAACTGGGCGATTGAAACTCCAGCCATTTTTATATATTTGTCCTGTGATTATCAGA  
GACGGTAAAACGAAATTGGAATTTATTTTTTTTTTGTGGAGAAAAACAAAGAAA  
TAAATATTGTCAGCAGTAAGACGGAGAGATTCTTAAAAGGAGTCATCCATTGTCAAT  
GAGGTGGCTACAAGCCACCAACTCCCCTGGAGTCAAATTCCTTGAGGACACCTCACC  
AACCCCTTACCCACTTTCTATTAGCAGCACATGTAGCCATCCCCAACAACA  
AATTGGTGAGCCCACCACAATTTTCTACTCTCTACGATTTAAATCAATTACACGTGGCATAAA  
ATGTCGAGCCTTTTATTTCAAGAAACCAAACCTAACACCGTGA  
ACTTAATTTCTTTTCGCAAATATCTAAAATAAGGGGACATGAATTA  
AATGTATAGAAATTGAATTAGTGTCCGAAACCTAAAATGACCACTGGACAAACACCGATAAGTGGGTCCC  
AAAATACCCACGGTGTCTAAGA  
ACTCACCAACCCCCACCCGGTTGGCAGCCGGTCCAACCACCCCACTACTCCGGCTCAAACCGGACTCTCATCTCCAATAAATACCACCTGCCCTTGCCATTTTC  
AATCAGGT  
CAGACATCCTTACCATCGTCGCCCCAGAAAAACCTTCCAACGCCAGGAAAGAGAGTATAGTTTTGTTATAAGATATACAAAATA

*PtrHCT1* (Potri.003G183900)

GTGATCTTCAATGTGGATGGCAAATTAATTAAGCTACGTGAGCGGAAAGACTTGCTG  
CTGCCGCTTAATCAGGTGGCTGATGTCTCTTGTAGAGACAAACACTACTGCTCTCTC  
CTTGAAAGTTGAAATATTTGCTTAAAGTCACCTCCACCTTGTA  
AAATCAAACAACAA TAATTT  
CGGCTTCAATCACTATTTCTTTTCTGTTTTTCCCGAATACTTGCGCGTTGAAA  
TTAAAAGCTTCTGCGTTTGAGTAGCTGCTAACCACACGGCGCACAGCCTTAGGCCCT  
TAGCCACATAATCAAGGCAAGAATCGTAATTGGATGCGAGGTTATAGTTGTTTTTTA  
AAGTATTTTTTATTCAAAAAAATATATCAATAATTTTTTTTATTTTTTAAAAATTAT  
TTTTAAATTAATATATTA  
AAATAATTTGAAAACATAAAAAAATATATTAATTTAAAA  
AAAATTTAAATTA  
AAAAAAAACTTTTCAAAAACAGTGTCAAACACATAGCTAGATA  
GATCATGCTGGCCATGTGGATACATCACAATTGTGCAGTTAATTTTCCACTTATTATT

GTCCCTTTCATACATGATTAACCCGCCAGACAAATCGGTTTCAGCTTTGAGTCGGTTT  
AACTCGTAGCTAGAGTAATCAGTTCAATTTTTTAAAACATAAAAAAAAAAATGTTCAA  
ATTATTGGAAATTATTTAACATTGATAATAAAAATTAAGAAAAGAAAAGAAAGGAG  
AGGAGAGGATGAAAAGAAAGAGAGAAAGAAGGTCATCTTTTTCAATGTTTCGTATAA  
ATAAAATAAAAAAAAAAGGTGAATTGACACCCTAAATTCCTTTTGGATGCATTAGATAAT  
ACAATTATTTATCTGATATTTTTACAAGTTAAATATGTTCCAATTTATTTGGTTAA  
AGTTACGTCTAAGTTCAACGAGATTCTCGATAAAGAAAATAAAAATCAATCCCTCTTG  
TTTATTGAAAATATCTTCGGTTCGGTGGAGTGGTTATTTGCGATAATCAGATCCTTTC  
TCGATTGATCTCACTAAAAGCGTTAACTTTTAGGATTCTCCACTTTAATTGGTGAGAT  
TATTTCTTCACTTTAATTATTTGCATTTTGAAGATGTCGATTACTTTACTGGTTTTAA  
TTTGTATTTCAACATGGATATAAATTGTTTAGGACTGCGGCCAACCATATTTCAAGA  
ATTGTTTTTAATATTTTATTATTTAATAACTGATATTGAAAATAAATTTTTAAAA  
ATAAAAAAATATTATTTAATAAAAATTTCTTTAAAAATCAACATAATGACGCTTAA  
AAAAAAGGCATGAAATGATGATTCAAGGAAGGATGAAAATGCTCTTTTATTTGAG  
TCATGTGCCATTAAATCCCAGTACATGAGCAGTGAAGTTGCTATCTTTTTTAATTTT  
AAGTTAAGATGATATAAATTAATTGGTGGAGTTTTAGATTTTTTTTTTAATGATTATG  
AGTTTGAATTTTTTTAAAATAATTAATAATTTATATAATTATTAATTTTAAAACATGT  
AAAATTAATGAATTTAACACAAGTTAGTTTCGGACATCTTCATTAATAATAATAA  
AAAAAGTTGCTCTTCTGTAAAAAACATATGCACCATCACCAAGTGCTACCTGC  
ATGTCTATGATGTTGCTAAAGTTATTCTGACTCACGGAAGGACAGATAAATTTTATA  
AAATTCGCTAGTGATTTATATATTATTTAAAGAAAAAAGAACTTGAAATTAATTA  
AATTTTGATTAAGTTGTGAATTTACTTGTGAGTGGATTAAATCTAATAAGATAAATT  
TGCTTGCGCGATGAAATCTCACCAGCTTGATCTGCTTCCAAAAATACCAAACAGTTT  
TCTTAGCTAATAAAGATAAAGTTGGTGTGATGCTTTGGTTATCGTGAGAGTGATGAA  
AAGTCAATGTCATAAAGGCTGGGGTTGGTGTGAGACCAATAAAAAATTGAAAAAACTA  
AATTGCTCCTCACAGATTCCTATAAAGGTGTCCCTCCAACATCCTTCTTGGAAAGGTG  
GCGACTCCATTGACCTTTGTTACCCCTCTCTCGAACCCCTCCTTTTGTCTTCGATATTCT  
CTCTACTTCTCTGCTCTAGGCTCACAGGT

*PtrCCR2* (Potri.003G181400)

GATTCACGAGATTGTCATGCAAAAAAATCTAAGAAGATATTTCCAATGTACGTTA  
TTCGGTCAAAATTTAGCTAACCATTTTGCTTATAATTTCCATGTTAATGAATTTTTAA  
AACTGAAGTGTTAAAAAAAAGAAGAAAGAAAGGACGAAACTTGAAGAAATTAA  
AAAAATTTAGTGAGCACAATAATAATTAAGAAAGTAATGAAGAATAATTTGAACA  
TTTCTAACCTTTCTCCGAGCAACTTAAAGATAAAAATAAAAATAATTAAGAA  
CTAAAAGATAAAGTGTGGAAGGTTTTAGAATGTGATGGGATAATCAATAATAAGAA  
ATAAAGAATTGAAAAAAAACATGCAGTTTTAGAAAATATAGAGAAAAAAAATC  
AGAGAAGAAAAGAGAAATAGAGAAAAAATCATGATAGCCATTAGCCTCCCTCTCAT  
TTCTCCTATCAGTGTCCGCTCACCACCACAGCTCCTCCAACCTACCCTGACCTCATA  
ATGGACAATAACCTATCTAGCACGTCGGCAACAACAGTTCCGTCTGGTTAGCTGTGCG  
TTGCTCCCTCACAAAACCCGAATAGAACCGAAACAACCCAGCAACCTCGACTCCTC

CTCAGCCCTAAAAAGTCATCCTAAACACCATCAACCACCTTGACTTGTCTTTTTTCCA  
TGCTTAGTAGCATGGCAGTAGGAGAAACAGATCAAAAACCATGAAGAAAGAAAAG  
ATAAAGAAAGCCTAGAAACCTTCTCTTGATCTCTTCTCATAAGTGGCAGTGAAGCTC  
ACCACTGACATCGAAGGGAAGAAAAAGAAGAAGCAACATATCTGGTGAAGGAAAT  
TTCTTAGAAGTATGGTTTACTCTATGTGCTTCTCTTCAACATACTTAGAAATTTCTG  
GATGCCCTTACATACGGGCTCTCCATTTTTACCTGGGGTTCAACCTCTCTTCTTATGA  
AAATTTTTTTGATGATATTATTATAATTAGATATTTTATAAGTTTTTCAGGGATTA  
ATATCACAAAAATTTAGGGTGTATTGATAAATCCAAATAAAATACATCTAACAAAT  
TATTTAAAATTAAAAAAAACTTAAAAAACATGAATGAGAACCCTAGCCTGGCACT  
CTTGTGCGCTCGGGTTGTCACCATAGTTTCATTTCTTAATTTATTAAGTTAAATTAAG  
ATACAATAAGTTAGTCACAACATTTTAAAGCAAAGAGAAACAGGAAATGGGTAAAA  
AACAAACATGCATTCTCTTTCACATTTTTTGTCCACCAGGTTCTTTGTTAGTCTAGGAGT  
ATTAATTAATTAATGATTGGATATTTTTCGGTTTGGATTCGGTTTGGTTTTTTTTGGTTT  
TAGACTTATAAAACCGAAACCGAACCGAACCGATCAGTTTTTTTTAAAATTTTAACCG  
GTTTTTTTCATAGTTTTTTTTTTAATTTTTTTTTAATTTTCTCGGTTTCTCATTTTTTTT  
TTAATTTTTTTTTGTTCAACCATGGTAGACGAGAAGAGAGGCCATGTCATCATAGAC  
CTTCAAAGAAGAGAGAGAAATAGCAAAGCACATGGTGACGTGGTGTGACGATTCA  
CAATACAAAGACTCAGGCTCCTCCTTACAAACCTTAATAAACATAATAATAATAAT  
AATAAGAGAAAAAACTAGAAAAAGAAAAACAAAGAGAGAATCCCTTTCCTCTCTCT  
CAGAGGCCAATATTTACCAGTAGTAGGTGAGGATGGTAACTTCTAACCTTATAAATA  
CATCCACTCCACCATGTCTTTCCTTGTAAACATCCACTTTTAAATCCAAGATAAGAAG  
AAAACACGCCTCCTCTCTTCTTGTCTCTGTCTGTCTCCACTTTCCAGTCACCAAA  
CTCGTATGCATATAATTACATTTATCTAAATATAACAAC

*PtrC3H3* (Potri.006G033300)

ACACGTGCGTGTGTGTGTATATATATATATATATTAATACGTGTCAATTTATTCAACA  
TTCTTACACACACAAAAAAAATGCTATTTATGTTAATATTAGGAGTTTTTTTTATAA  
GGAAAACCTGCAATGTATATTATTTATGCTATTATCAGGAGTTTTTTCTTAAAGAAAA  
ACTGATATTTATTTTATTTATGTTATTATTGGGAGCTGTTTTTTTTATATAAAAAAAC  
GCCCTGATTAATAATAAATAAATGTTATTATTAGGGTCATCCTGTCGTCATTTTAAAA  
TGGTGGATGGTGTAGGTGCTTCCGGCGGCCACCGTGGTCCTTATCTCTTACTGATTT  
TATTTTTTATTTTTATTTTTCCTTTCCTTCTGTTTTAAGCTATGATTTTTTTATTTTT  
TTTTTAATGTCAATCAATGGTTTGATAACGATGCATGATAGTTGCCAGCTTCTCAAG  
AAAATTCTGGCCTACCTACCCACCACCACCAACAAGCGTGGTCCCTCGAGGCCTTG  
ACACTTTACCATCCTCACCCATTTTTTACCAAATTCACCATCCAAATATCATATATAT  
AAAATCTTGTGTTGTTGTTTTTTACTTGGTGGATTTGAGACCACGTTAGAGCCCGATC  
TTGCTGAGGGTTTAGATTATCGAGTTAATCTGTGGATTAATTTTAAAATAAATTTTT  
TAGATAGTTTTTTTTTAATAACATTATTTTAAATATAAATTAAAAAAATTAAAACTG  
ATTCAATTAAGTTTCATTTGAGATTTCTTTATCCAGTTTGACTTATCAAGATACCTAA  
ATTTAATACACAAATTGACTTGAAAGCAAATCTAATCTAAGTTAGGTTTTAAGAGTC  
CATTTAGAAACATGGATACTTAAATTTTGA AAAACAAATTATTA AAAATTTATTTTTT

ATGTA CTGATCTCAAAAATAAATTTTTAAAAAATAAAAAATATTATTTTGATGTATTTC  
TAAGCTAAAAACACGTTGAACCGCAATCACCATTACAATTTCAAGCTTAAAATACAT  
TAAAATGTGTGATTGTGGGAGTTTGGGAGTGTGATTATGGTTACTTTTCAAAGTATTT  
TTCCTTGGAAATACATTAATAAATAATTTTTTAAAAAAATTATTTTAAATATCAGC  
ACATTA AAAATATCTAAAAACACTAAAAAAATATTGTTTTATACAAAAAAATAAA  
AAATAAAAATATATAATTTAAATCGCATTCTCGAACATTACATATCTCCCGGTCCAG  
CCGTCAAAGCAACTTTTAAATTATATAATAGTAGTAGATAACATTATGTGCCCCGT  
AATTATAAATTTCTATAGCAATTTCCCTCTCAATTATTACAAACCTTTTAACTTATCT  
TATTTTCTTAATTACAAATATGTGGGCTGCGAGAAATGAATAGAATGGTCTCCCCCT  
TCACCAACTTTTGATTCCCTCCTTCTTTGCTTGTTAAAAAGTCTCACTTCACCAACCAC  
CAAATACTAAAAAAAACAAAAAAACAAAAACCCGCTCTACTATCTTTTACCCGAG  
AGTGAAGTCACGCGCCACCGTTCTTGTGCACGTGGGACATTGTAATTGGTCAATGTT  
TCCCCACAATGGGCATTGACAAGTGACACTTTTTTCCCCTCCCTCTCCTATGACAGCG  
ACTATAAGCAGAAGCAAAGAGTCGCACATCGTCCCTCAACTTCTTAAATTTATTCAT  
GTTAGACCCTCTTCTTTAAGTTTGATCAAACACTACTACTTCAATCTCAATGAAATGCA  
TTCTTACCTCGTGAAAAA ACTCAATTATTAATTAATGACTTGAATGAACATCTGAA  
ATTGGATTTGTATGAAAGTAAAAAGGGTTTATTTGACCAATTTAAAGTGAGGGATT  
GAGTTGGTAATTTGTGGAAATTAGAGGGACCATGAATGATTTTAAACAAGAAACAA  
AATCCACTCACCAACTCCCTCCCTCGCAGAGACCAACTCCATTCCCTAACTCCATTCCCT  
ACAATTTATATTCTGCCAAGGCCCTTCAGAAAAATTAGACCCTTCTCTCCCTTTTTT  
TTTTCTCTCCACA

*PtrCESA7* (Potri.006G181900)

ATATGCTGTAGCCGTGTCTTGATAAGAATACAAGGTTGGTACTTCACTTTCTTAAAC  
AATGGTGCTTTTCTTTCTAGTGTCTTAGTTTTAATCTCTTAAATTGACATAAAAAAAT  
GAACACAGCACTACCTGTGCCAAACTGCCATAAGCAAATCACCAACAGTTACATTG  
CGTGGATGTAGCAAGTTTTACAAATACAAATCTTGTGTGCGGTTAGGAGAGGCTAC  
ACTGTCCAGATGGAGAAGCTCCAACATACCCA ACTAACGATTGGAACATGACTTGA  
GTTTAAAGTTCTTGCATTCTAAGCATGCTCATTACCGTGTTTTTTCAGCTTGCATTAAC  
AGTTGACGGGCAGCGGAAGTTTTGAAAGGGAAGGATTTGAACTGTACCAAGTATCA  
CCGGTTGGCAGATAGTAGGGCCTCAGCTAATGTATGTATGCATGCATGCATGCATGT  
ATATGGGATTCTTAACTAGTAAGTCACTCATAACAAGAACTGAAAGTGGAAATAT  
CTTGTGCTCCATGGAGATCAAATTCGTATTTATGATTTAACAAAGAATTCAATGTAG  
CAATGCTATTTTCGTGCTGATAACCTCCTTGCCATAAATAAATAAAAATAAACTGAGCA  
GGAGAATGAAGTAATACCATTCCCTCCCGAATTCTATCCATCTTGAATCTATTTCCAA  
ATTGACATCGATGTTGATAGGTGGTGTGTTATTTTATTAGGAAATATATTA AAAATAA  
CATATTTTAAAAAAAATTAATTTTGATATTTGCTTATTA AAAATAAATAAAAAAACA  
TTTTAAATAAAAAAAAATTAATTTTTGAGAATTCTATTTAGAACGAAA ACTCAAGA  
CATCGGAATCAACTCAACTGAGAAAATTCAATTTAGTATGAAAAACTTGTTTGTAA  
TCATTCTTTTTCATAATATACCAATAATCATATTGTTTTGGAAAAAGAATTCGGAAGT  
GGTTTTTCATCATGCATAGCATTAGTCAAAGAGAGGAAGAGTTGATCAAGTTTACA

GGCATTACTGAAAGGCCTCGAGTAATTTTGTAGAGCCACGATTACCAAGAGTATTTT  
GAGCAACAGAAGAAACAATTAATTAACAAAAAGTAATGAAAAAAGAAAAGAAGCA  
GACATGAACTGTTTCAGTGTTAACCAAGA ACTTGTCTCCGGCTTCCTTCAGCCTAAA  
CAGCATGCGACTAACGAGCATGCATGCTTA ACTCAAACGCCAAGTGATCTTCACTTG  
AAAAATTACAAA ACTAGTACTGTGCCCAAATGTCAATCCCAAGTATAAACGTGGTCT  
AATCAGCCGTTATATTTCCCCCTTTCTTCTTTCGGTTTTTGTCTGGTATAAGAACAACA  
TTTGAGTTCCCTATCCAAAGAACAATAAAAATTCGAGTCCGAGTCCATGCCCCTAGCTC  
TTCCTGCTGTAAAGAAAGTCGTTCAATTTGTTGTTGAATCAAACAAAAACACACCCA  
TGTC AATATTAAGTAATGGGTTTTTTGTTTTTGTGGGGGTATAACTTTTTACAGCAA  
AAAATGCAAAGTAAAAGCAGTAAATTCATGTCTTTTCTGCTGTGTTTTTTTTGCTTT  
TAGTA ACTTTTTGCGTTTTTTACTGTGAAGGGTTAACCATAACAAACGCCAAAAATAAA  
AAAAAACACAAACACACTAGTAAAAATCAAACATAAGTGTA ACTAAAGGGAGGC  
CAAGTGTAAGATTTACTTTCATTTTCCAAGTTCTTTTTTAAAAAATAACAAAAG  
AGCTAAAATAAATTATCAAGAAATGATATCCGAAA ACTAGAGATATAATACTGAAA  
CCGAGTTGGTCGTCGAAAAGAAGGCATAAGAGAAGGGCACGGTAGTTGAAAATA  
GACGAAGCTTA ACTTCAAGGCAATGGCGACTCTGCAACCAACTTCCACACCACCAC  
CCTTAACATGCCACATTAGGTGAGAGCAAGAGATCCAGCACAACTTTCTATACCCTA  
CCCTTCCATT CATAAAAAAGAAACTCACCCCCTCTCAACCCAGTAGCTCTCTCGC  
CCCTTCCATTGCTCAAC

*PtrCESA8* (Potri.011G069600)

ATTCGTGTGTTATCCTAACAACATACCATAAACTGATTCACCATCTCCAGCATTCGA  
CGTCACTGATATTTTGT TTTGGTGCTTTTATGATCTCATAGAAAGTATAGTCTAAATA  
TGGCCCTTAAGCTTGTATTATTCTGTTGACCTGTAAGATTTACCAGTAGAACCTTTTC  
TTGAATACAGGTTTGCCTGACATAAAGAACGGTAGCAATGGGGCACAATGTTTGAA  
TCCTGCATTTGTT CATGCAATAGCAGTTCCAGATGTTGATATGTTGGATAAGTCTGAT  
AAAATATGTGTTGTGGCTAGGGGTGATGGTATTGTTGATGTAATAAATATTGAATCA  
GAGCTTGCAGTTATTAGATCAAAA ACTTCAGCAAAAGCACGGAAAGGATCTTCATC  
AACATCTAAAGATGGTGTCCAGCTGCAGGTACAGGA ACTCTTGATGAAAATGCAA  
GAAAAGGTTACATTTGGATTACTCTGTGGGCGGCCATGCTGCTGCTGTATCCTGTG  
TCACATTTTCACAGTTTGGGGAGAAGGGGAAGTTGATAATATCAGGTGGGAATGAC  
AAGTCTGTGAAAGTCTGGGATTGCTCCAAATATGATGATGCAGTGCAGACTGGTGGC  
AACAGTGATGTTCTTCGTCTTAACATTAATTTGAGCAAAAAGGTCAGTTTTTCATTGTC  
TTTTTGACAATATCTTGGTTTTTCAGCTTCTTGTTCTTTTGCATCACTCGTGTTGGAAT  
CTTTTCATCTCATACTTTCCATTTTGGCAGGTCAATTGGCTCTGTACCACTCCGACTG  
ACTCAGAAAACCTTGTTGTTTGTGACACAACAAAAGTAGTAAAGGTCTATTCTGTTT  
CTTAGTTTACAGCTAAAACATCAAAGACTCCTGGAGAGCATGCCTTAATTCTATTGC  
AGGAGAAGATTGTTTCCTGTTTGTCTCAGTGTTGCGTCAATTGCTTGGTTATCCAAGG  
GCAGCCTTTTACAGTTATCATCATTTT GACCGAGGTAAAGTGATGATACACCAGCC  
ACCCCTTTCAAGGCACACCGGCAAAACCCATGATTTTTAGAGTTTTAAGCTTGTATA  
AGTTGAGTCACAGGTTGATGAACAGCTGTACAAAATGGAATTATTATGGTTCATAGG

AATTTCTTCGCTGTTATATTTCTCAGAATGATTATCGAACTGAATGGATATCGTTGAC  
TAAATTTCTGCAACAAGTCTCCTTACAGTTTTGCTGGTTTTCTTTGACTAGGAGCAAAA  
TTTGCATGATGTGAATTGGCTTGTGATTTATCAAATTAGAAAGAGTATGTATCAAAA  
GGAATTTATGTGTTAATATTCATGACCAAACCTTACTTCCCCCATCCCCAGAAAATA  
CAAAGATGGCTGAATAAGCAACGCTTCTGTTGTTATCGTCCAATTTTAATTTTCATCG  
AATAAATTCAGTCAGGCACCAAAAAGAACAAGTCAATCAATTCTTTCATGAAATGC  
CCTTTTTTTTTAAATCAATTTTTTGATGTCTTTTTTCATGGTTCGTTGAATGGCTCTGTT  
TGCATCTGGTGTTGCAATTTCCCGTGTAGATTTAACAGGAAAATGGATTCTTTAGTC  
ATTTGCATCTTCATCAAAAGCAAGGATCTAAGATCTACGAAAATGGATGCCCATCAT  
CTGTTCTTGGGGATAACACTGATGTGAAGTCGCAGAGAATAAATGGTTAATCTGCTA  
CCATTACTGGACCAACCAGATATATGGTCTCAGCGACATAAAAAGAGATGTGCTTTA  
TTTTTCATTTTTTTCCTTTCCTTGAGAGACTTACCCTGATACATCGATATGATGATTAT  
CTGAAGCATGCCGATGGGAGACGCCAGTACACTGTTTGGATGCTGCCAGTTTTTCGGT  
CTACATGGCGGCCAGCCCCGGATCTTGTGTTTATATTCAAGAGAGGGGACTTGCAT  
TGAAAGTAAGTTTGTTAAAGATGTGCTCTGCCTAACAGACACCTTCCTTAAACTTCC  
CGCAAAAATTTCAAACCTTTTCTCTTTCACCCCAAAAATTAGACGTTGCTTCTCATCT  
CTCTCTTTCTCTGTAAACACATGACACCAACTCCTCAACCGCCATGCCCCACCAACC  
TCAACCCTCTCTTCTGCATTAAAAAATGTCAGCACCACCCTCTGAGAGACAACCAAG  
ACACCCTAGCTTTGGTTAGGGTCTTTGATATAAAAACCAGGCCAAAATAAAAGATTG  
AAAAGCAGAGGGAAGCCCTCTTGAAAGAAGTGAAGGAATTGGGGGTGTAAAGAGCC  
GGTGAAGTGGTAATCAGCAAA

**Supplementary Table 6.**

See Supplementary Spread Sheet
